# Supplementary material for: Mendelian randomization analysis suggests no causal influence of gastroesophageal reflux disease on the susceptibility and prognosis of idiopathic pulmonary fibrosis
Source: Springer Nature journal article supplement (doi:10.1186/s12890-023-02788-8), 2023-12-21
Supplement: MOESM1 [file 26555854]

## Supplemental Material

Mendelian Randomization Analysis Suggests No Causal Influence of Gastroesophageal Reflux Disease on the Susceptibility and Prognosis of Idiopathic Pulmonary Fibrosis

Di Sun, Qiao Ye\*

Department of Occupational Medicine and Toxicology, Clinical Center for Interstitial Lung Diseases, Beijing Institute of Respiratory Medicine, Beijing Chao-Yang Hospital, Capital Medical University, Beijing 100020, China

\* Correspondence:

Professor Qiao Ye

Department of Occupational Medicine and Toxicology, Clinical Center for Interstitial Lung Diseases, Beijing Institute of Respiratory Medicine, Beijing Chao-Yang Hospital, Capital Medical University

yeqiao\_chaoyang@sina.com

**Table S1 Potential confounders of exposure SNPs in the PhenoScanner database**

| <b>Exposure</b>               | <b>Outcomes</b> | <b>Excluded SNPs</b> | <b>Trait</b>                                      |                                          |
|-------------------------------|-----------------|----------------------|---------------------------------------------------|------------------------------------------|
| GERD<br>(discovery<br>cohort) | FVC             | rs215614             | Smoking behavior                                  |                                          |
|                               |                 | rs13107325           | FEV <sub>1</sub> % predicted                      |                                          |
|                               |                 | rs12357321           | FVC                                               |                                          |
|                               |                 | rs2782641            | Smoking behavior                                  |                                          |
|                               |                 | rs12967855           | Smoking behavior, FEV <sub>1</sub> , FVC          |                                          |
|                               |                 | rs1510719            | FEV <sub>1</sub>                                  |                                          |
|                               |                 | rs1479405            | FEV <sub>1</sub>                                  |                                          |
|                               |                 | rs10010963           | Smoking behavior                                  |                                          |
|                               |                 | rs773109             | FEV <sub>1</sub>                                  |                                          |
|                               |                 | rs9372625            | Exposure to tobacco smoke, FEV <sub>1</sub> , FVC |                                          |
|                               |                 | rs329122             | Smoking behavior                                  |                                          |
|                               |                 | rs324769             | Smoking behavior                                  |                                          |
|                               |                 | rs4300861            | Smoking behavior                                  |                                          |
|                               |                 | DLCO                 | rs13107325                                        | FEV <sub>1</sub> % predicted             |
|                               |                 |                      | rs12357321                                        | FVC                                      |
|                               |                 |                      | rs2782641                                         | Smoking behavior                         |
|                               |                 |                      | rs12967855                                        | Smoking behavior, FEV <sub>1</sub> , FVC |
|                               |                 |                      | rs1510719                                         | FEV <sub>1</sub>                         |
|                               | rs1479405       |                      | FEV <sub>1</sub>                                  |                                          |
|                               | rs10010963      |                      | Smoking behavior                                  |                                          |
|                               | rs773109        |                      | FEV <sub>1</sub>                                  |                                          |
|                               | rs9372625       |                      | Exposure to tobacco smoke, FEV <sub>1</sub> , FVC |                                          |
|                               | rs329122        |                      | Smoking behavior                                  |                                          |
|                               | rs324769        |                      | Smoking behavior                                  |                                          |
|                               | rs4300861       |                      | Smoking behavior                                  |                                          |
|                               | TFS             |                      | rs215614                                          | Smoking behavior                         |
|                               |                 |                      | rs13107325                                        | FEV <sub>1</sub> % predicted             |
|                               |                 |                      | rs12357321                                        | FVC                                      |
|                               |                 |                      | rs12967855                                        | Smoking behavior, FEV <sub>1</sub> , FVC |
|                               |                 |                      | rs1510719                                         | FEV <sub>1</sub>                         |
|                               |                 |                      | rs1479405                                         | FEV <sub>1</sub>                         |
|                               |                 | rs10010963           | Smoking behavior                                  |                                          |
|                               |                 | rs773109             | FEV <sub>1</sub>                                  |                                          |
|                               |                 | rs9372625            | Exposure to tobacco smoke, FEV <sub>1</sub> , FVC |                                          |
|                               |                 | rs2782641            | Smoking behavior                                  |                                          |
|                               |                 | rs329122             | Smoking behavior                                  |                                          |
| rs4300861                     |                 | Smoking behavior     |                                                   |                                          |
| Susceptibility                |                 | rs215614             | Smoking behavior                                  |                                          |
|                               |                 | rs2613505            | Smoking behavior, previous                        |                                          |
|                               |                 | rs2782641            | Smoking behavior                                  |                                          |

| <b>Exposure</b> | <b>Outcomes</b> | <b>Excluded SNPs</b> | <b>Trait</b>               |
|-----------------|-----------------|----------------------|----------------------------|
|                 |                 | rs12357321           | Smoking behavior, previous |
|                 |                 | rs1592757            | Smoking behavior, previous |
|                 |                 | rs10010963           | Smoking behavior           |
|                 |                 | rs6711584            | Smoking behavior, previous |
|                 |                 | rs329122             | Smoking behavior           |
|                 |                 | rs324769             | Smoking behavior           |
|                 |                 | rs4300861            | Smoking behavior           |
|                 |                 | rs12967855           | Smoking behavior           |
| GERD            | FVC             | rs10887132           | FEV <sub>1</sub> , FVC     |
| (replication    | DLCO            | rs10887132           | FEV <sub>1</sub> , FVC     |
| cohort)         | TFS             | rs10887132           | FEV <sub>1</sub> , FVC     |
|                 | Susceptibility  | None                 | -                          |

The potential confounders of FVC, DLco, and TFS in patients with idiopathic pulmonary fibrosis included pulmonary function testing, pollution and occupation (excluded previous exposures), and pulmonary infection. The potential confounders of susceptibility on idiopathic pulmonary fibrosis included pollution and occupation, animal antigens, and viral exposures. Abbreviations: SNP: single nucleotide polymorphism; GERD: gastroesophageal reflux disease; FVC: forced vital capacity; FEV<sub>1</sub>: forced expiratory volume in 1 s; DLco: diffuse lung capacity for carbon monoxide; TFS: transplantation-free survival.

**Table S2 Summary information on SNPs of GRED used as genetic instruments for the MR analyses**

| SNPs                                             | EA | NEA | EAF   | Beta   | SE    | Sample size | <i>P</i> -value        | R <sup>2</sup>        | <i>F</i> -statistics |
|--------------------------------------------------|----|-----|-------|--------|-------|-------------|------------------------|-----------------------|----------------------|
| <b>62 SNPs for GRED on FVC, discovery cohort</b> |    |     |       |        |       |             |                        |                       |                      |
| rs1011407                                        | A  | G   | 0.878 | 0.042  | 0.007 | 55,499      | $1.09 \times 10^{-8}$  | $3.78 \times 10^{-4}$ | 33                   |
| rs10133111                                       | G  | A   | 0.837 | -0.042 | 0.007 | 55,581      | $1.35 \times 10^{-10}$ | $4.76 \times 10^{-4}$ | 41                   |
| rs1021363                                        | A  | G   | 0.358 | 0.031  | 0.005 | 55,401      | $5.10 \times 10^{-10}$ | $4.48 \times 10^{-4}$ | 39                   |
| rs10837002                                       | C  | G   | 0.649 | -0.028 | 0.005 | 55,605      | $4.03 \times 10^{-8}$  | $3.48 \times 10^{-4}$ | 30                   |
| rs11762636                                       | C  | A   | 0.820 | 0.051  | 0.006 | 55,423      | $1.88 \times 10^{-16}$ | $7.83 \times 10^{-4}$ | 68                   |
| rs12204714                                       | C  | T   | 0.368 | 0.029  | 0.005 | 55,429      | $7.92 \times 10^{-9}$  | $3.86 \times 10^{-4}$ | 33                   |
| rs12453010                                       | C  | T   | 0.605 | -0.030 | 0.005 | 55,027      | $1.75 \times 10^{-9}$  | $4.21 \times 10^{-4}$ | 36                   |
| rs12598916                                       | C  | G   | 0.725 | 0.033  | 0.005 | 55,368      | $6.87 \times 10^{-10}$ | $4.41 \times 10^{-4}$ | 38                   |
| rs12997558                                       | G  | A   | 0.641 | -0.028 | 0.005 | 55,346      | $3.04 \times 10^{-8}$  | $3.56 \times 10^{-4}$ | 31                   |
| rs1334297                                        | G  | A   | 0.266 | 0.039  | 0.005 | 55,300      | $1.14 \times 10^{-12}$ | $5.87 \times 10^{-4}$ | 51                   |
| rs13409451                                       | A  | G   | 0.608 | 0.028  | 0.005 | 55,257      | $1.93 \times 10^{-8}$  | $3.66 \times 10^{-4}$ | 32                   |
| rs1431196                                        | A  | G   | 0.572 | -0.032 | 0.005 | 55,140      | $2.65 \times 10^{-11}$ | $5.14 \times 10^{-4}$ | 44                   |
| rs1592757                                        | G  | C   | 0.644 | -0.031 | 0.005 | 55,559      | $6.00 \times 10^{-10}$ | $4.44 \times 10^{-4}$ | 38                   |
| rs1596747                                        | A  | G   | 0.506 | -0.031 | 0.005 | 55,670      | $1.00 \times 10^{-10}$ | $4.83 \times 10^{-4}$ | 42                   |
| rs1716171                                        | C  | T   | 0.210 | -0.038 | 0.006 | 55,381      | $7.82 \times 10^{-11}$ | $4.89 \times 10^{-4}$ | 42                   |
| rs17379561                                       | A  | T   | 0.856 | -0.053 | 0.007 | 55,522      | $1.08 \times 10^{-14}$ | $6.96 \times 10^{-4}$ | 60                   |
| rs1883842                                        | T  | G   | 0.721 | -0.031 | 0.005 | 55,209      | $9.27 \times 10^{-9}$  | $3.83 \times 10^{-4}$ | 33                   |
| rs1937450                                        | T  | G   | 0.462 | -0.032 | 0.005 | 54,639      | $7.07 \times 10^{-11}$ | $4.96 \times 10^{-4}$ | 43                   |
| rs2016933                                        | C  | G   | 0.270 | 0.031  | 0.005 | 55,414      | $1.04 \times 10^{-8}$  | $3.79 \times 10^{-4}$ | 33                   |
| rs2023878                                        | C  | T   | 0.808 | 0.036  | 0.006 | 55,227      | $3.04 \times 10^{-9}$  | $4.09 \times 10^{-4}$ | 35                   |
| rs2043539                                        | G  | A   | 0.581 | -0.027 | 0.005 | 55,631      | $2.24 \times 10^{-8}$  | $3.60 \times 10^{-4}$ | 31                   |
| rs2164300                                        | C  | T   | 0.477 | 0.026  | 0.005 | 55,075      | $4.13 \times 10^{-8}$  | $3.50 \times 10^{-4}$ | 30                   |

| <b>SNPs</b> | <b>EA</b> | <b>NEA</b> | <b>EAF</b> | <b>Beta</b> | <b>SE</b> | <b>Sample size</b> | <b>P-value</b>         | <b>R<sup>2</sup></b>  | <b>F-statistics</b> |
|-------------|-----------|------------|------------|-------------|-----------|--------------------|------------------------|-----------------------|---------------------|
| rs2240326   | G         | A          | 0.526      | 0.047       | 0.005     | 55,674             | $1.13 \times 10^{-22}$ | $1.11 \times 10^{-3}$ | 96                  |
| rs2396133   | A         | G          | 0.525      | -0.029      | 0.005     | 55,446             | $1.11 \times 10^{-9}$  | $4.30 \times 10^{-4}$ | 37                  |
| rs2396766   | G         | A          | 0.527      | -0.032      | 0.005     | 55,425             | $2.33 \times 10^{-11}$ | $5.17 \times 10^{-4}$ | 45                  |
| rs2613505   | C         | T          | 0.200      | -0.039      | 0.006     | 55,418             | $1.17 \times 10^{-10}$ | $4.80 \times 10^{-4}$ | 42                  |
| rs2734839   | C         | T          | 0.393      | 0.028       | 0.005     | 55,355             | $8.79 \times 10^{-9}$  | $3.84 \times 10^{-4}$ | 33                  |
| rs2744961   | C         | T          | 0.642      | -0.029      | 0.005     | 55,635             | $5.81 \times 10^{-9}$  | $3.92 \times 10^{-4}$ | 34                  |
| rs2834005   | T         | C          | 0.685      | -0.030      | 0.005     | 55,500             | $9.42 \times 10^{-9}$  | $3.81 \times 10^{-4}$ | 33                  |
| rs2838771   | G         | C          | 0.353      | 0.028       | 0.005     | 55,271             | $2.91 \times 10^{-8}$  | $3.61 \times 10^{-4}$ | 31                  |
| rs3766823   | G         | A          | 0.829      | -0.039      | 0.006     | 55,515             | $7.09 \times 10^{-10}$ | $4.40 \times 10^{-4}$ | 38                  |
| rs3793577   | A         | G          | 0.462      | -0.027      | 0.005     | 54,460             | $2.49 \times 10^{-8}$  | $3.63 \times 10^{-4}$ | 31                  |
| rs3828917   | G         | T          | 0.958      | -0.067      | 0.012     | 55,673             | $2.27 \times 10^{-8}$  | $3.61 \times 10^{-4}$ | 31                  |
| rs3863241   | C         | T          | 0.473      | -0.032      | 0.005     | 55,578             | $1.49 \times 10^{-11}$ | $5.27 \times 10^{-4}$ | 46                  |
| rs4382592   | T         | G          | 0.300      | 0.030       | 0.005     | 55,446             | $8.20 \times 10^{-9}$  | $3.85 \times 10^{-4}$ | 33                  |
| rs4713692   | C         | T          | 0.632      | 0.028       | 0.005     | 55,721             | $3.07 \times 10^{-8}$  | $3.55 \times 10^{-4}$ | 31                  |
| rs569356    | A         | G          | 0.859      | 0.038       | 0.007     | 55,601             | $4.07 \times 10^{-8}$  | $3.48 \times 10^{-4}$ | 30                  |
| rs6711584   | G         | A          | 0.548      | -0.032      | 0.005     | 55,140             | $2.66 \times 10^{-11}$ | $5.15 \times 10^{-4}$ | 44                  |
| rs6722661   | G         | A          | 0.635      | 0.032       | 0.005     | 55,396             | $1.15 \times 10^{-10}$ | $4.82 \times 10^{-4}$ | 42                  |
| rs6780459   | A         | T          | 0.253      | -0.031      | 0.006     | 55,576             | $3.14 \times 10^{-8}$  | $3.53 \times 10^{-4}$ | 31                  |
| rs7032155   | C         | A          | 0.408      | -0.028      | 0.005     | 54,863             | $1.63 \times 10^{-8}$  | $3.72 \times 10^{-4}$ | 32                  |
| rs7206608   | C         | G          | 0.677      | -0.029      | 0.005     | 55,434             | $1.46 \times 10^{-8}$  | $3.72 \times 10^{-4}$ | 32                  |
| rs7241572   | G         | A          | 0.791      | -0.037      | 0.006     | 53,887             | $9.49 \times 10^{-10}$ | $4.42 \times 10^{-4}$ | 37                  |
| rs7527682   | A         | G          | 0.463      | 0.027       | 0.005     | 55,547             | $3.13 \times 10^{-8}$  | $3.54 \times 10^{-4}$ | 31                  |
| rs7541875   | A         | G          | 0.574      | -0.027      | 0.005     | 55,810             | $1.61 \times 10^{-8}$  | $3.67 \times 10^{-4}$ | 32                  |
| rs7600261   | C         | T          | 0.694      | -0.034      | 0.005     | 55,531             | $9.47 \times 10^{-11}$ | $4.86 \times 10^{-4}$ | 42                  |

| SNPs                                              | EA | NEA | EAF   | Beta   | SE    | Sample size | P-value                | R <sup>2</sup>        | F-statistics |
|---------------------------------------------------|----|-----|-------|--------|-------|-------------|------------------------|-----------------------|--------------|
| rs7612999                                         | G  | A   | 0.755 | -0.031 | 0.006 | 55,396      | $4.90 \times 10^{-8}$  | $3.45 \times 10^{-4}$ | 30           |
| rs761777                                          | A  | G   | 0.746 | -0.035 | 0.006 | 55,606      | $4.71 \times 10^{-10}$ | $4.52 \times 10^{-4}$ | 39           |
| rs7675588                                         | C  | A   | 0.205 | 0.034  | 0.006 | 55,455      | $1.80 \times 10^{-8}$  | $3.67 \times 10^{-4}$ | 32           |
| rs7685686                                         | A  | G   | 0.578 | 0.028  | 0.005 | 55,432      | $1.14 \times 10^{-8}$  | $3.80 \times 10^{-4}$ | 33           |
| rs7942368                                         | C  | T   | 0.785 | 0.034  | 0.006 | 53,991      | $9.54 \times 10^{-9}$  | $3.89 \times 10^{-4}$ | 33           |
| rs903678                                          | G  | A   | 0.661 | -0.028 | 0.005 | 55,569      | $4.89 \times 10^{-8}$  | $3.45 \times 10^{-4}$ | 30           |
| rs903959                                          | T  | A   | 0.601 | -0.029 | 0.005 | 55,339      | $2.99 \times 10^{-9}$  | $4.08 \times 10^{-4}$ | 35           |
| rs9373363                                         | A  | G   | 0.746 | 0.033  | 0.006 | 54,713      | $4.13 \times 10^{-9}$  | $4.04 \times 10^{-4}$ | 35           |
| rs9396740                                         | G  | A   | 0.751 | 0.031  | 0.006 | 55,476      | $1.47 \times 10^{-8}$  | $3.71 \times 10^{-4}$ | 32           |
| rs942065                                          | G  | A   | 0.366 | -0.031 | 0.005 | 55,098      | $8.45 \times 10^{-10}$ | $4.38 \times 10^{-4}$ | 38           |
| rs9517313                                         | G  | C   | 0.617 | -0.033 | 0.005 | 55,658      | $2.05 \times 10^{-11}$ | $5.18 \times 10^{-4}$ | 45           |
| rs9529055                                         | G  | A   | 0.524 | -0.027 | 0.005 | 55,506      | $3.11 \times 10^{-8}$  | $3.55 \times 10^{-4}$ | 31           |
| rs9542729                                         | C  | G   | 0.798 | 0.036  | 0.006 | 55,285      | $1.41 \times 10^{-9}$  | $4.26 \times 10^{-4}$ | 37           |
| rs9615905                                         | C  | T   | 0.542 | -0.028 | 0.005 | 55,538      | $1.21 \times 10^{-8}$  | $3.77 \times 10^{-4}$ | 32           |
| rs9636202                                         | G  | A   | 0.733 | 0.035  | 0.005 | 55,069      | $1.51 \times 10^{-10}$ | $4.80 \times 10^{-4}$ | 41           |
| rs9940128                                         | G  | A   | 0.578 | -0.033 | 0.005 | 55,566      | $8.06 \times 10^{-12}$ | $5.39 \times 10^{-4}$ | 47           |
| <b>61 SNPs for GRED on DLco, discovery cohort</b> |    |     |       |        |       |             |                        |                       |              |
| rs1011407                                         | A  | G   | 0.878 | 0.042  | 0.007 | 55499       | $1.09 \times 10^{-8}$  | $3.78 \times 10^{-4}$ | 33           |
| rs10133111                                        | G  | A   | 0.837 | -0.042 | 0.007 | 55581       | $1.35 \times 10^{-10}$ | $4.76 \times 10^{-4}$ | 41           |
| rs1021363                                         | A  | G   | 0.358 | 0.031  | 0.005 | 55401       | $5.10 \times 10^{-10}$ | $4.48 \times 10^{-4}$ | 39           |
| rs10837002                                        | C  | G   | 0.649 | -0.028 | 0.005 | 55605       | $4.03 \times 10^{-8}$  | $3.48 \times 10^{-4}$ | 30           |
| rs11762636                                        | C  | A   | 0.820 | 0.051  | 0.006 | 55423       | $1.88 \times 10^{-16}$ | $7.83 \times 10^{-4}$ | 68           |
| rs12204714                                        | C  | T   | 0.368 | 0.029  | 0.005 | 55429       | $7.92 \times 10^{-9}$  | $3.86 \times 10^{-4}$ | 33           |
| rs12453010                                        | C  | T   | 0.605 | -0.030 | 0.005 | 55027       | $1.75 \times 10^{-9}$  | $4.21 \times 10^{-4}$ | 36           |

| <b>SNPs</b> | <b>EA</b> | <b>NEA</b> | <b>EAF</b> | <b>Beta</b> | <b>SE</b> | <b>Sample size</b> | <b>P-value</b>         | <b>R<sup>2</sup></b>  | <b>F-statistics</b> |
|-------------|-----------|------------|------------|-------------|-----------|--------------------|------------------------|-----------------------|---------------------|
| rs12598916  | C         | G          | 0.725      | 0.033       | 0.005     | 55368              | $6.87 \times 10^{-10}$ | $4.41 \times 10^{-4}$ | 38                  |
| rs12997558  | G         | A          | 0.641      | -0.028      | 0.005     | 55,346             | $3.04 \times 10^{-8}$  | $3.56 \times 10^{-4}$ | 31                  |
| rs1334297   | G         | A          | 0.266      | 0.039       | 0.005     | 55,300             | $1.14 \times 10^{-12}$ | $5.87 \times 10^{-4}$ | 51                  |
| rs13409451  | A         | G          | 0.608      | 0.028       | 0.005     | 55,257             | $1.93 \times 10^{-8}$  | $3.66 \times 10^{-4}$ | 32                  |
| rs1431196   | A         | G          | 0.572      | -0.032      | 0.005     | 55,140             | $2.65 \times 10^{-11}$ | $5.15 \times 10^{-4}$ | 44                  |
| rs1592757   | G         | C          | 0.644      | -0.031      | 0.005     | 55,559             | $6.00 \times 10^{-10}$ | $4.44 \times 10^{-4}$ | 38                  |
| rs1596747   | A         | G          | 0.506      | -0.031      | 0.005     | 55,670             | $1.00 \times 10^{-10}$ | $4.83 \times 10^{-4}$ | 42                  |
| rs1716171   | C         | T          | 0.210      | -0.038      | 0.006     | 55,381             | $7.82 \times 10^{-11}$ | $4.89 \times 10^{-4}$ | 42                  |
| rs17379561  | A         | T          | 0.856      | -0.053      | 0.007     | 55,522             | $1.08 \times 10^{-14}$ | $6.96 \times 10^{-4}$ | 60                  |
| rs1883842   | T         | G          | 0.721      | -0.031      | 0.005     | 55,209             | $9.27 \times 10^{-9}$  | $3.83 \times 10^{-4}$ | 33                  |
| rs1937450   | T         | G          | 0.462      | -0.032      | 0.005     | 54,639             | $7.07 \times 10^{-11}$ | $4.96 \times 10^{-4}$ | 43                  |
| rs2016933   | C         | G          | 0.270      | 0.031       | 0.005     | 55,414             | $1.04 \times 10^{-8}$  | $3.79 \times 10^{-4}$ | 33                  |
| rs2023878   | C         | T          | 0.808      | 0.036       | 0.006     | 55,227             | $3.04 \times 10^{-9}$  | $4.09 \times 10^{-4}$ | 35                  |
| rs2043539   | G         | A          | 0.581      | -0.027      | 0.005     | 55,631             | $2.24 \times 10^{-8}$  | $3.60 \times 10^{-4}$ | 31                  |
| rs2164300   | C         | T          | 0.477      | 0.026       | 0.005     | 55,075             | $4.13 \times 10^{-8}$  | $3.50 \times 10^{-4}$ | 30                  |
| rs2240326   | G         | A          | 0.526      | 0.047       | 0.005     | 55,674             | $1.13 \times 10^{-22}$ | $1.11 \times 10^{-3}$ | 96                  |
| rs2396133   | A         | G          | 0.525      | -0.029      | 0.005     | 55,446             | $1.11 \times 10^{-9}$  | $4.30 \times 10^{-4}$ | 37                  |
| rs2396766   | G         | A          | 0.527      | -0.032      | 0.005     | 55,425             | $2.33 \times 10^{-11}$ | $5.17 \times 10^{-4}$ | 45                  |
| rs2613505   | C         | T          | 0.200      | -0.039      | 0.006     | 55,418             | $1.17 \times 10^{-10}$ | $4.80 \times 10^{-4}$ | 42                  |
| rs2734839   | C         | T          | 0.393      | 0.028       | 0.005     | 55,355             | $8.79 \times 10^{-9}$  | $3.84 \times 10^{-4}$ | 33                  |
| rs2744961   | C         | T          | 0.642      | -0.029      | 0.005     | 55,635             | $5.81 \times 10^{-9}$  | $3.92 \times 10^{-4}$ | 34                  |
| rs2834005   | T         | C          | 0.685      | -0.030      | 0.005     | 55,500             | $9.42 \times 10^{-9}$  | $3.81 \times 10^{-4}$ | 33                  |
| rs2838771   | G         | C          | 0.353      | 0.028       | 0.005     | 55,271             | $2.91 \times 10^{-8}$  | $3.61 \times 10^{-4}$ | 31                  |
| rs3766823   | G         | A          | 0.829      | -0.039      | 0.006     | 55,515             | $7.09 \times 10^{-10}$ | $4.40 \times 10^{-4}$ | 38                  |

| <b>SNPs</b> | <b>EA</b> | <b>NEA</b> | <b>EAF</b> | <b>Beta</b> | <b>SE</b> | <b>Sample size</b> | <b><i>P</i>-value</b>  | <b>R<sup>2</sup></b>  | <b><i>F</i>-statistics</b> |
|-------------|-----------|------------|------------|-------------|-----------|--------------------|------------------------|-----------------------|----------------------------|
| rs3793577   | A         | G          | 0.462      | -0.027      | 0.005     | 54,460             | $2.49 \times 10^{-8}$  | $3.63 \times 10^{-4}$ | 31                         |
| rs3828917   | G         | T          | 0.958      | -0.067      | 0.012     | 55,673             | $2.27 \times 10^{-8}$  | $3.61 \times 10^{-4}$ | 31                         |
| rs3863241   | C         | T          | 0.473      | -0.032      | 0.005     | 55,578             | $1.49 \times 10^{-11}$ | $5.27 \times 10^{-4}$ | 46                         |
| rs4382592   | T         | G          | 0.300      | 0.030       | 0.005     | 55,446             | $8.20 \times 10^{-9}$  | $3.85 \times 10^{-4}$ | 33                         |
| rs4713692   | C         | T          | 0.632      | 0.028       | 0.005     | 55,721             | $3.07 \times 10^{-8}$  | $3.55 \times 10^{-4}$ | 31                         |
| rs569356    | A         | G          | 0.859      | 0.038       | 0.007     | 55,601             | $4.07 \times 10^{-8}$  | $3.48 \times 10^{-4}$ | 30                         |
| rs6711584   | G         | A          | 0.548      | -0.032      | 0.005     | 55,140             | $2.66 \times 10^{-11}$ | $5.15 \times 10^{-4}$ | 44                         |
| rs6722661   | G         | A          | 0.635      | 0.032       | 0.005     | 55,396             | $1.15 \times 10^{-10}$ | $4.82 \times 10^{-4}$ | 42                         |
| rs6780459   | A         | T          | 0.253      | -0.031      | 0.006     | 55,576             | $3.14 \times 10^{-8}$  | $3.53 \times 10^{-4}$ | 31                         |
| rs7032155   | C         | A          | 0.408      | -0.028      | 0.005     | 54,863             | $1.63 \times 10^{-8}$  | $3.72 \times 10^{-4}$ | 32                         |
| rs7206608   | C         | G          | 0.677      | -0.029      | 0.005     | 55,434             | $1.46 \times 10^{-8}$  | $3.72 \times 10^{-4}$ | 32                         |
| rs7241572   | G         | A          | 0.791      | -0.037      | 0.006     | 53,887             | $9.49 \times 10^{-10}$ | $4.42 \times 10^{-4}$ | 37                         |
| rs7527682   | A         | G          | 0.463      | 0.027       | 0.005     | 55,547             | $3.13 \times 10^{-8}$  | $3.54 \times 10^{-4}$ | 31                         |
| rs7541875   | A         | G          | 0.574      | -0.027      | 0.005     | 55,810             | $1.61 \times 10^{-8}$  | $3.67 \times 10^{-4}$ | 32                         |
| rs7600261   | C         | T          | 0.694      | -0.034      | 0.005     | 55,531             | $9.47 \times 10^{-11}$ | $4.86 \times 10^{-4}$ | 42                         |
| rs7612999   | G         | A          | 0.755      | -0.031      | 0.006     | 55,396             | $4.90 \times 10^{-8}$  | $3.45 \times 10^{-4}$ | 30                         |
| rs761777    | A         | G          | 0.746      | -0.035      | 0.006     | 55,606             | $4.71 \times 10^{-10}$ | $4.52 \times 10^{-4}$ | 39                         |
| rs7675588   | C         | A          | 0.205      | 0.034       | 0.006     | 55,455             | $1.80 \times 10^{-8}$  | $3.67 \times 10^{-4}$ | 32                         |
| rs7685686   | A         | G          | 0.578      | 0.028       | 0.005     | 55,432             | $1.14 \times 10^{-8}$  | $3.80 \times 10^{-4}$ | 33                         |
| rs7942368   | C         | T          | 0.785      | 0.034       | 0.006     | 53,991             | $9.54 \times 10^{-9}$  | $3.89 \times 10^{-4}$ | 33                         |
| rs903678    | G         | A          | 0.661      | -0.028      | 0.005     | 55,569             | $4.89 \times 10^{-8}$  | $3.45 \times 10^{-4}$ | 30                         |
| rs903959    | T         | A          | 0.601      | -0.029      | 0.005     | 55,339             | $2.99 \times 10^{-9}$  | $4.08 \times 10^{-4}$ | 35                         |
| rs9373363   | A         | G          | 0.746      | 0.033       | 0.006     | 54,713             | $4.13 \times 10^{-9}$  | $4.04 \times 10^{-4}$ | 35                         |
| rs9396740   | G         | A          | 0.751      | 0.031       | 0.006     | 55,476             | $1.47 \times 10^{-8}$  | $3.71 \times 10^{-4}$ | 32                         |



| SNPs                                             | EA | NEA | EAF   | Beta   | SE    | Sample size | <i>P</i> -value        | R <sup>2</sup>        | <i>F</i> -statistics |
|--------------------------------------------------|----|-----|-------|--------|-------|-------------|------------------------|-----------------------|----------------------|
| rs942065                                         | G  | A   | 0.366 | -0.031 | 0.005 | 55,098      | $8.45 \times 10^{-10}$ | $4.38 \times 10^{-4}$ | 38                   |
| rs9529055                                        | G  | A   | 0.524 | -0.027 | 0.005 | 55,506      | $3.11 \times 10^{-8}$  | $3.55 \times 10^{-4}$ | 31                   |
| rs9542729                                        | C  | G   | 0.798 | 0.036  | 0.006 | 55,285      | $1.41 \times 10^{-9}$  | $4.26 \times 10^{-4}$ | 37                   |
| rs9615905                                        | C  | T   | 0.542 | -0.028 | 0.005 | 55,538      | $1.21 \times 10^{-8}$  | $3.77 \times 10^{-4}$ | 32                   |
| rs9636202                                        | G  | A   | 0.733 | 0.035  | 0.005 | 55,069      | $1.51 \times 10^{-10}$ | $4.80 \times 10^{-4}$ | 41                   |
| rs9940128                                        | G  | A   | 0.578 | -0.033 | 0.005 | 55,566      | $8.06 \times 10^{-12}$ | $5.39 \times 10^{-4}$ | 47                   |
| <b>60 SNPs for GRED on TFS, discovery cohort</b> |    |     |       |        |       |             |                        |                       |                      |
| rs1011407                                        | A  | G   | 0.878 | 0.042  | 0.007 | 55,499      | $1.09 \times 10^{-8}$  | $3.78 \times 10^{-4}$ | 33                   |
| rs10133111                                       | G  | A   | 0.837 | -0.042 | 0.007 | 55,581      | $1.35 \times 10^{-10}$ | $4.76 \times 10^{-4}$ | 41                   |
| rs1021363                                        | A  | G   | 0.358 | 0.031  | 0.005 | 55,401      | $5.10 \times 10^{-10}$ | $4.48 \times 10^{-4}$ | 39                   |
| rs10837002                                       | C  | G   | 0.649 | -0.028 | 0.005 | 55,605      | $4.03 \times 10^{-8}$  | $3.48 \times 10^{-4}$ | 30                   |
| rs11762636                                       | C  | A   | 0.820 | 0.051  | 0.006 | 55,423      | $1.88 \times 10^{-16}$ | $7.83 \times 10^{-4}$ | 68                   |
| rs11953061                                       | C  | T   | 0.661 | -0.028 | 0.005 | 55,084      | $3.10 \times 10^{-8}$  | $3.55 \times 10^{-4}$ | 31                   |
| rs12204714                                       | C  | T   | 0.368 | 0.029  | 0.005 | 55,429      | $7.92 \times 10^{-9}$  | $3.86 \times 10^{-4}$ | 33                   |
| rs12453010                                       | C  | T   | 0.605 | -0.030 | 0.005 | 55,027      | $1.75 \times 10^{-9}$  | $4.21 \times 10^{-4}$ | 36                   |
| rs12598916                                       | C  | G   | 0.725 | 0.033  | 0.005 | 55,368      | $6.87 \times 10^{-10}$ | $4.41 \times 10^{-4}$ | 38                   |
| rs12997558                                       | G  | A   | 0.641 | -0.028 | 0.005 | 55,346      | $3.04 \times 10^{-8}$  | $3.56 \times 10^{-4}$ | 31                   |
| rs1334297                                        | G  | A   | 0.266 | 0.039  | 0.005 | 55,300      | $1.14 \times 10^{-12}$ | $5.87 \times 10^{-4}$ | 51                   |
| rs13409451                                       | A  | G   | 0.608 | 0.028  | 0.005 | 55,257      | $1.93 \times 10^{-8}$  | $3.66 \times 10^{-4}$ | 32                   |
| rs1431196                                        | A  | G   | 0.572 | -0.032 | 0.005 | 55,140      | $2.65 \times 10^{-11}$ | $5.15 \times 10^{-4}$ | 44                   |
| rs1592757                                        | G  | C   | 0.644 | -0.031 | 0.005 | 55,559      | $6.00 \times 10^{-10}$ | $4.44 \times 10^{-4}$ | 38                   |
| rs1596747                                        | A  | G   | 0.506 | -0.031 | 0.005 | 55,670      | $1.00 \times 10^{-10}$ | $4.83 \times 10^{-4}$ | 42                   |
| rs1716171                                        | C  | T   | 0.210 | -0.038 | 0.006 | 55,381      | $7.82 \times 10^{-11}$ | $4.89 \times 10^{-4}$ | 42                   |
| rs17379561                                       | A  | T   | 0.856 | -0.053 | 0.007 | 55,522      | $1.08 \times 10^{-14}$ | $6.96 \times 10^{-4}$ | 60                   |

| <b>SNPs</b> | <b>EA</b> | <b>NEA</b> | <b>EAF</b> | <b>Beta</b> | <b>SE</b> | <b>Sample size</b> | <b>P-value</b>         | <b>R<sup>2</sup></b>  | <b>F-statistics</b> |
|-------------|-----------|------------|------------|-------------|-----------|--------------------|------------------------|-----------------------|---------------------|
| rs1883842   | T         | G          | 0.721      | -0.031      | 0.005     | 55,209             | $9.27 \times 10^{-9}$  | $3.83 \times 10^{-4}$ | 33                  |
| rs1937450   | T         | G          | 0.462      | -0.032      | 0.005     | 54,639             | $7.07 \times 10^{-11}$ | $4.96 \times 10^{-4}$ | 43                  |
| rs2016933   | C         | G          | 0.270      | 0.031       | 0.005     | 55,414             | $1.04 \times 10^{-8}$  | $3.79 \times 10^{-4}$ | 33                  |
| rs2023878   | C         | T          | 0.808      | 0.036       | 0.006     | 55,227             | $3.04 \times 10^{-9}$  | $4.09 \times 10^{-4}$ | 35                  |
| rs2043539   | G         | A          | 0.581      | -0.027      | 0.005     | 55,631             | $2.24 \times 10^{-8}$  | $3.60 \times 10^{-4}$ | 31                  |
| rs2106353   | G         | T          | 0.769      | -0.037      | 0.006     | 55,129             | $1.37 \times 10^{-10}$ | $4.80 \times 10^{-4}$ | 41                  |
| rs2164300   | C         | T          | 0.477      | 0.026       | 0.005     | 55,075             | $4.13 \times 10^{-8}$  | $3.50 \times 10^{-4}$ | 30                  |
| rs2240326   | G         | A          | 0.526      | 0.047       | 0.005     | 55,674             | $1.13 \times 10^{-22}$ | $1.11 \times 10^{-3}$ | 96                  |
| rs2396133   | A         | G          | 0.525      | -0.029      | 0.005     | 55,446             | $1.11 \times 10^{-9}$  | $4.30 \times 10^{-4}$ | 37                  |
| rs2396766   | G         | A          | 0.527      | -0.032      | 0.005     | 55,425             | $2.33 \times 10^{-11}$ | $5.17 \times 10^{-4}$ | 45                  |
| rs2613505   | C         | T          | 0.200      | -0.039      | 0.006     | 55,418             | $1.17 \times 10^{-10}$ | $4.80 \times 10^{-4}$ | 42                  |
| rs2734839   | C         | T          | 0.393      | 0.028       | 0.005     | 55,355             | $8.79 \times 10^{-9}$  | $3.84 \times 10^{-4}$ | 33                  |
| rs2744961   | C         | T          | 0.642      | -0.029      | 0.005     | 55,635             | $5.81 \times 10^{-9}$  | $3.92 \times 10^{-4}$ | 34                  |
| rs2834005   | T         | C          | 0.685      | -0.030      | 0.005     | 55,500             | $9.42 \times 10^{-9}$  | $3.81 \times 10^{-4}$ | 33                  |
| rs2838771   | G         | C          | 0.353      | 0.028       | 0.005     | 55,271             | $2.91 \times 10^{-8}$  | $3.61 \times 10^{-4}$ | 31                  |
| rs3766823   | G         | A          | 0.829      | -0.039      | 0.006     | 55,515             | $7.09 \times 10^{-10}$ | $4.40 \times 10^{-4}$ | 38                  |
| rs3828917   | G         | T          | 0.958      | -0.067      | 0.012     | 55,673             | $2.27 \times 10^{-8}$  | $3.61 \times 10^{-4}$ | 31                  |
| rs3863241   | C         | T          | 0.473      | -0.032      | 0.005     | 55,578             | $1.49 \times 10^{-11}$ | $5.27 \times 10^{-4}$ | 46                  |
| rs4713692   | C         | T          | 0.632      | 0.028       | 0.005     | 55,721             | $3.07 \times 10^{-8}$  | $3.55 \times 10^{-4}$ | 31                  |
| rs569356    | A         | G          | 0.859      | 0.038       | 0.007     | 55,601             | $4.07 \times 10^{-8}$  | $3.48 \times 10^{-4}$ | 30                  |
| rs6711584   | G         | A          | 0.548      | -0.032      | 0.005     | 55,140             | $2.66 \times 10^{-11}$ | $5.15 \times 10^{-4}$ | 44                  |
| rs6722661   | G         | A          | 0.635      | 0.032       | 0.005     | 55,396             | $1.15 \times 10^{-10}$ | $4.82 \times 10^{-4}$ | 42                  |
| rs6780459   | A         | T          | 0.253      | -0.031      | 0.006     | 55,576             | $3.14 \times 10^{-8}$  | $3.53 \times 10^{-4}$ | 31                  |
| rs7206608   | C         | G          | 0.677      | -0.029      | 0.005     | 55,434             | $1.46 \times 10^{-8}$  | $3.72 \times 10^{-4}$ | 32                  |

| SNPs                                                        | EA | NEA | EAF   | Beta   | SE    | Sample size | <i>P</i> -value        | R <sup>2</sup>        | <i>F</i> -statistics |
|-------------------------------------------------------------|----|-----|-------|--------|-------|-------------|------------------------|-----------------------|----------------------|
| rs7241572                                                   | G  | A   | 0.791 | -0.037 | 0.006 | 53,887      | $9.49 \times 10^{-10}$ | $4.42 \times 10^{-4}$ | 37                   |
| rs7527682                                                   | A  | G   | 0.463 | 0.027  | 0.005 | 55,547      | $3.13 \times 10^{-8}$  | $3.54 \times 10^{-4}$ | 31                   |
| rs7541875                                                   | A  | G   | 0.574 | -0.027 | 0.005 | 55,810      | $1.61 \times 10^{-8}$  | $3.67 \times 10^{-4}$ | 32                   |
| rs7600261                                                   | C  | T   | 0.694 | -0.034 | 0.005 | 55,531      | $9.47 \times 10^{-11}$ | $4.86 \times 10^{-4}$ | 42                   |
| rs7612999                                                   | G  | A   | 0.755 | -0.031 | 0.006 | 55,396      | $4.90 \times 10^{-8}$  | $3.45 \times 10^{-4}$ | 30                   |
| rs761777                                                    | A  | G   | 0.746 | -0.035 | 0.006 | 55,606      | $4.71 \times 10^{-10}$ | $4.52 \times 10^{-4}$ | 39                   |
| rs7675588                                                   | C  | A   | 0.205 | 0.034  | 0.006 | 55,455      | $1.80 \times 10^{-8}$  | $3.67 \times 10^{-4}$ | 32                   |
| rs7685686                                                   | A  | G   | 0.578 | 0.028  | 0.005 | 55,432      | $1.14 \times 10^{-8}$  | $3.80 \times 10^{-4}$ | 33                   |
| rs7942368                                                   | C  | T   | 0.785 | 0.034  | 0.006 | 53,991      | $9.54 \times 10^{-9}$  | $3.89 \times 10^{-4}$ | 33                   |
| rs903678                                                    | G  | A   | 0.661 | -0.028 | 0.005 | 55,569      | $4.89 \times 10^{-8}$  | $3.45 \times 10^{-4}$ | 30                   |
| rs9373363                                                   | A  | G   | 0.746 | 0.033  | 0.006 | 54,713      | $4.13 \times 10^{-9}$  | $4.04 \times 10^{-4}$ | 35                   |
| rs9396740                                                   | G  | A   | 0.751 | 0.031  | 0.006 | 55,476      | $1.47 \times 10^{-8}$  | $3.71 \times 10^{-4}$ | 32                   |
| rs942065                                                    | G  | A   | 0.366 | -0.031 | 0.005 | 55,098      | $8.45 \times 10^{-10}$ | $4.38 \times 10^{-4}$ | 38                   |
| rs9517313                                                   | G  | C   | 0.617 | -0.033 | 0.005 | 55,658      | $2.05 \times 10^{-11}$ | $5.18 \times 10^{-4}$ | 45                   |
| rs9529055                                                   | G  | A   | 0.524 | -0.027 | 0.005 | 55,506      | $3.11 \times 10^{-8}$  | $3.55 \times 10^{-4}$ | 31                   |
| rs9542729                                                   | C  | G   | 0.798 | 0.036  | 0.006 | 55,285      | $1.41 \times 10^{-9}$  | $4.26 \times 10^{-4}$ | 37                   |
| rs9615905                                                   | C  | T   | 0.542 | -0.028 | 0.005 | 55,538      | $1.21 \times 10^{-8}$  | $3.77 \times 10^{-4}$ | 32                   |
| rs9636202                                                   | G  | A   | 0.733 | 0.035  | 0.005 | 55,069      | $1.51 \times 10^{-10}$ | $4.80 \times 10^{-4}$ | 41                   |
| rs9940128                                                   | G  | A   | 0.578 | -0.033 | 0.005 | 55,566      | $8.06 \times 10^{-12}$ | $5.39 \times 10^{-4}$ | 47                   |
| <b>75 SNPs for GRED on susceptibility, discovery cohort</b> |    |     |       |        |       |             |                        |                       |                      |
| rs10010963                                                  | C  | T   | 0.384 | 0.027  | 0.005 | 55,391      | $4.92 \times 10^{-8}$  | $3.44 \times 10^{-4}$ | 30                   |
| rs1011407                                                   | A  | G   | 0.878 | 0.042  | 0.007 | 55,499      | $1.09 \times 10^{-8}$  | $3.78 \times 10^{-4}$ | 33                   |
| rs10133111                                                  | G  | A   | 0.837 | -0.042 | 0.007 | 55,581      | $1.35 \times 10^{-10}$ | $4.76 \times 10^{-4}$ | 41                   |
| rs1021363                                                   | A  | G   | 0.358 | 0.031  | 0.005 | 55,401      | $5.10 \times 10^{-10}$ | $4.48 \times 10^{-4}$ | 39                   |

| <b>SNPs</b> | <b>EA</b> | <b>NEA</b> | <b>EAF</b> | <b>Beta</b> | <b>SE</b> | <b>Sample size</b> | <b>P-value</b>         | <b>R<sup>2</sup></b>  | <b>F-statistics</b> |
|-------------|-----------|------------|------------|-------------|-----------|--------------------|------------------------|-----------------------|---------------------|
| rs10837002  | C         | G          | 0.649      | -0.028      | 0.005     | 55,605             | $4.03 \times 10^{-8}$  | $3.48 \times 10^{-4}$ | 30                  |
| rs11762636  | C         | A          | 0.820      | 0.051       | 0.006     | 55,423             | $1.88 \times 10^{-16}$ | $7.83 \times 10^{-4}$ | 68                  |
| rs12204714  | C         | T          | 0.368      | 0.029       | 0.005     | 55,429             | $7.92 \times 10^{-9}$  | $3.86 \times 10^{-4}$ | 33                  |
| rs12357321  | G         | A          | 0.689      | -0.032      | 0.005     | 54,582             | $1.33 \times 10^{-9}$  | $4.31 \times 10^{-4}$ | 37                  |
| rs12453010  | C         | T          | 0.605      | -0.030      | 0.005     | 55,027             | $1.75 \times 10^{-9}$  | $4.21 \times 10^{-4}$ | 36                  |
| rs12598916  | C         | G          | 0.725      | 0.033       | 0.005     | 55,368             | $6.87 \times 10^{-10}$ | $4.41 \times 10^{-4}$ | 38                  |
| rs12967855  | A         | G          | 0.330      | 0.037       | 0.005     | 55,051             | $1.09 \times 10^{-12}$ | $5.90 \times 10^{-4}$ | 51                  |
| rs12997558  | G         | A          | 0.641      | -0.028      | 0.005     | 55,346             | $3.04 \times 10^{-8}$  | $3.56 \times 10^{-4}$ | 31                  |
| rs13107325  | C         | T          | 0.926      | -0.070      | 0.009     | 55,434             | $2.20 \times 10^{-14}$ | $6.78 \times 10^{-4}$ | 58                  |
| rs1334297   | G         | A          | 0.266      | 0.039       | 0.005     | 55,300             | $1.14 \times 10^{-12}$ | $5.87 \times 10^{-4}$ | 51                  |
| rs13409451  | A         | G          | 0.608      | 0.028       | 0.005     | 55,257             | $1.93 \times 10^{-8}$  | $3.66 \times 10^{-4}$ | 32                  |
| rs1431196   | A         | G          | 0.572      | -0.032      | 0.005     | 55,140             | $2.65 \times 10^{-11}$ | $5.15 \times 10^{-4}$ | 44                  |
| rs1479405   | C         | T          | 0.678      | -0.031      | 0.005     | 55,492             | $9.85 \times 10^{-10}$ | $4.33 \times 10^{-4}$ | 37                  |
| rs1510719   | T         | C          | 0.617      | 0.039       | 0.005     | 55,373             | $3.84 \times 10^{-15}$ | $7.15 \times 10^{-4}$ | 62                  |
| rs1592757   | G         | C          | 0.644      | -0.031      | 0.005     | 55,559             | $6.00 \times 10^{-10}$ | $4.44 \times 10^{-4}$ | 38                  |
| rs1596747   | A         | G          | 0.506      | -0.031      | 0.005     | 55,670             | $1.00 \times 10^{-10}$ | $4.83 \times 10^{-4}$ | 42                  |
| rs1716171   | C         | T          | 0.210      | -0.038      | 0.006     | 55,381             | $7.82 \times 10^{-11}$ | $4.89 \times 10^{-4}$ | 42                  |
| rs17379561  | A         | T          | 0.856      | -0.053      | 0.007     | 55,522             | $1.08 \times 10^{-14}$ | $6.96 \times 10^{-4}$ | 60                  |
| rs1883842   | T         | G          | 0.721      | -0.031      | 0.005     | 55,209             | $9.27 \times 10^{-9}$  | $3.83 \times 10^{-4}$ | 33                  |
| rs1937450   | T         | G          | 0.462      | -0.032      | 0.005     | 54,639             | $7.07 \times 10^{-11}$ | $4.96 \times 10^{-4}$ | 43                  |
| rs2016933   | C         | G          | 0.270      | 0.031       | 0.005     | 55,414             | $1.04 \times 10^{-8}$  | $3.79 \times 10^{-4}$ | 33                  |
| rs2023878   | C         | T          | 0.808      | 0.036       | 0.006     | 55,227             | $3.04 \times 10^{-9}$  | $4.09 \times 10^{-4}$ | 35                  |
| rs2043539   | G         | A          | 0.581      | -0.027      | 0.005     | 55,631             | $2.24 \times 10^{-8}$  | $3.60 \times 10^{-4}$ | 31                  |
| rs215614    | G         | A          | 0.370      | 0.033       | 0.005     | 55,406             | $4.08 \times 10^{-11}$ | $5.03 \times 10^{-4}$ | 44                  |

| <b>SNPs</b> | <b>EA</b> | <b>NEA</b> | <b>EAF</b> | <b>Beta</b> | <b>SE</b> | <b>Sample size</b> | <b>P-value</b>         | <b>R<sup>2</sup></b>  | <b>F-statistics</b> |
|-------------|-----------|------------|------------|-------------|-----------|--------------------|------------------------|-----------------------|---------------------|
| rs2164300   | C         | T          | 0.477      | 0.026       | 0.005     | 55,075             | $4.13 \times 10^{-8}$  | $3.50 \times 10^{-4}$ | 30                  |
| rs2240326   | G         | A          | 0.526      | 0.047       | 0.005     | 55,674             | $1.13 \times 10^{-22}$ | $1.11 \times 10^{-3}$ | 96                  |
| rs2396133   | A         | G          | 0.525      | -0.029      | 0.005     | 55,446             | $1.11 \times 10^{-9}$  | $4.30 \times 10^{-4}$ | 37                  |
| rs2396766   | G         | A          | 0.527      | -0.032      | 0.005     | 55,425             | $2.33 \times 10^{-11}$ | $5.17 \times 10^{-4}$ | 45                  |
| rs2613505   | C         | T          | 0.200      | -0.039      | 0.006     | 55,418             | $1.17 \times 10^{-10}$ | $4.80 \times 10^{-4}$ | 42                  |
| rs2734839   | C         | T          | 0.393      | 0.028       | 0.005     | 55,355             | $8.79 \times 10^{-9}$  | $3.84 \times 10^{-4}$ | 33                  |
| rs2744961   | C         | T          | 0.642      | -0.029      | 0.005     | 55,635             | $5.81 \times 10^{-9}$  | $3.92 \times 10^{-4}$ | 34                  |
| rs2782641   | G         | A          | 0.387      | -0.027      | 0.005     | 55,107             | $4.33 \times 10^{-8}$  | $3.48 \times 10^{-4}$ | 30                  |
| rs2834005   | T         | C          | 0.685      | -0.030      | 0.005     | 55,500             | $9.42 \times 10^{-9}$  | $3.81 \times 10^{-4}$ | 33                  |
| rs2838771   | G         | C          | 0.353      | 0.028       | 0.005     | 55,271             | $2.91 \times 10^{-8}$  | $3.61 \times 10^{-4}$ | 31                  |
| rs324769    | C         | T          | 0.551      | 0.027       | 0.005     | 55,497             | $3.05 \times 10^{-8}$  | $3.55 \times 10^{-4}$ | 31                  |
| rs329122    | G         | A          | 0.580      | 0.029       | 0.005     | 55,403             | $3.05 \times 10^{-9}$  | $4.08 \times 10^{-4}$ | 35                  |
| rs3766823   | G         | A          | 0.829      | -0.039      | 0.006     | 55,515             | $7.09 \times 10^{-10}$ | $4.40 \times 10^{-4}$ | 38                  |
| rs3793577   | A         | G          | 0.462      | -0.027      | 0.005     | 54,460             | $2.49 \times 10^{-8}$  | $3.63 \times 10^{-4}$ | 31                  |
| rs3828917   | G         | T          | 0.958      | -0.067      | 0.012     | 55,673             | $2.27 \times 10^{-8}$  | $3.61 \times 10^{-4}$ | 31                  |
| rs3863241   | C         | T          | 0.473      | -0.032      | 0.005     | 55,578             | $1.49 \times 10^{-11}$ | $5.27 \times 10^{-4}$ | 46                  |
| rs4300861   | C         | T          | 0.618      | -0.031      | 0.005     | 55,421             | $5.43 \times 10^{-10}$ | $4.45 \times 10^{-4}$ | 39                  |
| rs4382592   | T         | G          | 0.300      | 0.030       | 0.005     | 55,446             | $8.20 \times 10^{-9}$  | $3.85 \times 10^{-4}$ | 33                  |
| rs4713692   | C         | T          | 0.632      | 0.028       | 0.005     | 55,721             | $3.07 \times 10^{-8}$  | $3.55 \times 10^{-4}$ | 31                  |
| rs569356    | A         | G          | 0.859      | 0.038       | 0.007     | 55,601             | $4.07 \times 10^{-8}$  | $3.48 \times 10^{-4}$ | 30                  |
| rs6711584   | G         | A          | 0.548      | -0.032      | 0.005     | 55,140             | $2.66 \times 10^{-11}$ | $5.15 \times 10^{-4}$ | 44                  |
| rs6722661   | G         | A          | 0.635      | 0.032       | 0.005     | 55,396             | $1.15 \times 10^{-10}$ | $4.82 \times 10^{-4}$ | 42                  |
| rs6780459   | A         | T          | 0.253      | -0.031      | 0.006     | 55,576             | $3.14 \times 10^{-8}$  | $3.53 \times 10^{-4}$ | 31                  |
| rs7032155   | C         | A          | 0.408      | -0.028      | 0.005     | 54,863             | $1.63 \times 10^{-8}$  | $3.72 \times 10^{-4}$ | 32                  |

| SNPs      | EA | NEA | EAF   | Beta   | SE    | Sample size | <i>P</i> -value        | R <sup>2</sup>        | <i>F</i> -statistics |
|-----------|----|-----|-------|--------|-------|-------------|------------------------|-----------------------|----------------------|
| rs7206608 | C  | G   | 0.677 | -0.029 | 0.005 | 55,434      | $1.46 \times 10^{-8}$  | $3.72 \times 10^{-4}$ | 32                   |
| rs7241572 | G  | A   | 0.791 | -0.037 | 0.006 | 53,887      | $9.49 \times 10^{-10}$ | $4.42 \times 10^{-4}$ | 37                   |
| rs7527682 | A  | G   | 0.463 | 0.027  | 0.005 | 55,547      | $3.13 \times 10^{-8}$  | $3.54 \times 10^{-4}$ | 31                   |
| rs7541875 | A  | G   | 0.574 | -0.027 | 0.005 | 55,810      | $1.61 \times 10^{-8}$  | $3.67 \times 10^{-4}$ | 32                   |
| rs7600261 | C  | T   | 0.694 | -0.034 | 0.005 | 55,531      | $9.47 \times 10^{-11}$ | $4.86 \times 10^{-4}$ | 42                   |
| rs7612999 | G  | A   | 0.755 | -0.031 | 0.006 | 55,396      | $4.90 \times 10^{-8}$  | $3.45 \times 10^{-4}$ | 30                   |
| rs761777  | A  | G   | 0.746 | -0.035 | 0.006 | 55,606      | $4.71 \times 10^{-10}$ | $4.52 \times 10^{-4}$ | 39                   |
| rs7675588 | C  | A   | 0.205 | 0.034  | 0.006 | 55,455      | $1.80 \times 10^{-8}$  | $3.67 \times 10^{-4}$ | 32                   |
| rs7685686 | A  | G   | 0.578 | 0.028  | 0.005 | 55,432      | $1.14 \times 10^{-8}$  | $3.80 \times 10^{-4}$ | 33                   |
| rs773109  | G  | A   | 0.665 | 0.038  | 0.005 | 55,447      | $8.71 \times 10^{-14}$ | $6.46 \times 10^{-4}$ | 56                   |
| rs7942368 | C  | T   | 0.785 | 0.034  | 0.006 | 53,991      | $9.54 \times 10^{-9}$  | $3.89 \times 10^{-4}$ | 33                   |
| rs903678  | G  | A   | 0.661 | -0.028 | 0.005 | 55,569      | $4.89 \times 10^{-8}$  | $3.45 \times 10^{-4}$ | 30                   |
| rs903959  | T  | A   | 0.601 | -0.029 | 0.005 | 55,339      | $2.99 \times 10^{-9}$  | $4.08 \times 10^{-4}$ | 35                   |
| rs9372625 | G  | A   | 0.617 | 0.038  | 0.005 | 55,150      | $2.62 \times 10^{-14}$ | $6.73 \times 10^{-4}$ | 58                   |
| rs9373363 | A  | G   | 0.746 | 0.033  | 0.006 | 54,713      | $4.13 \times 10^{-9}$  | $4.04 \times 10^{-4}$ | 35                   |
| rs9396740 | G  | A   | 0.751 | 0.031  | 0.006 | 55,476      | $1.47 \times 10^{-8}$  | $3.71 \times 10^{-4}$ | 32                   |
| rs942065  | G  | A   | 0.366 | -0.031 | 0.005 | 55,098      | $8.45 \times 10^{-10}$ | $4.38 \times 10^{-4}$ | 38                   |
| rs9517313 | G  | C   | 0.617 | -0.033 | 0.005 | 55,658      | $2.05 \times 10^{-11}$ | $5.18 \times 10^{-4}$ | 45                   |
| rs9529055 | G  | A   | 0.524 | -0.027 | 0.005 | 55,506      | $3.11 \times 10^{-8}$  | $3.55 \times 10^{-4}$ | 31                   |
| rs9542729 | C  | G   | 0.798 | 0.036  | 0.006 | 55,285      | $1.41 \times 10^{-9}$  | $4.26 \times 10^{-4}$ | 37                   |
| rs9615905 | C  | T   | 0.542 | -0.028 | 0.005 | 55,538      | $1.21 \times 10^{-8}$  | $3.77 \times 10^{-4}$ | 32                   |
| rs9636202 | G  | A   | 0.733 | 0.035  | 0.005 | 55,069      | $1.51 \times 10^{-10}$ | $4.80 \times 10^{-4}$ | 41                   |
| rs9940128 | G  | A   | 0.578 | -0.033 | 0.005 | 55,566      | $8.06 \times 10^{-12}$ | $5.39 \times 10^{-4}$ | 47                   |

**63 SNPs for GRED on susceptibility (excluded confounding factors), discovery cohort**

| <b>SNPs</b> | <b>EA</b> | <b>NEA</b> | <b>EAF</b> | <b>Beta</b> | <b>SE</b> | <b>Sample size</b> | <b><i>P</i>-value</b>  | <b>R<sup>2</sup></b>  | <b><i>F</i>-statistics</b> |
|-------------|-----------|------------|------------|-------------|-----------|--------------------|------------------------|-----------------------|----------------------------|
| rs10133111  | G         | A          | 0.837      | -0.042      | 0.007     | 55,581             | $1.35 \times 10^{-10}$ | $4.76 \times 10^{-4}$ | 41                         |
| rs1021363   | A         | G          | 0.358      | 0.031       | 0.005     | 55,401             | $5.10 \times 10^{-10}$ | $4.48 \times 10^{-4}$ | 39                         |
| rs10837002  | C         | G          | 0.649      | -0.028      | 0.005     | 55,605             | $4.03 \times 10^{-8}$  | $3.48 \times 10^{-4}$ | 30                         |
| rs11762636  | C         | A          | 0.820      | 0.051       | 0.006     | 55,423             | $1.88 \times 10^{-16}$ | $7.83 \times 10^{-4}$ | 68                         |
| rs12204714  | C         | T          | 0.368      | 0.029       | 0.005     | 55,429             | $7.92 \times 10^{-9}$  | $3.86 \times 10^{-4}$ | 33                         |
| rs12453010  | C         | T          | 0.605      | -0.030      | 0.005     | 55,027             | $1.75 \times 10^{-9}$  | $4.21 \times 10^{-4}$ | 36                         |
| rs12598916  | C         | G          | 0.725      | 0.033       | 0.005     | 55,368             | $6.87 \times 10^{-10}$ | $4.41 \times 10^{-4}$ | 38                         |
| rs12997558  | G         | A          | 0.641      | -0.028      | 0.005     | 55,346             | $3.04 \times 10^{-8}$  | $3.56 \times 10^{-4}$ | 31                         |
| rs13107325  | C         | T          | 0.926      | -0.070      | 0.009     | 55,434             | $2.20 \times 10^{-14}$ | $6.78 \times 10^{-4}$ | 58                         |
| rs1334297   | G         | A          | 0.266      | 0.039       | 0.005     | 55,300             | $1.14 \times 10^{-12}$ | $5.87 \times 10^{-4}$ | 51                         |
| rs13409451  | A         | G          | 0.608      | 0.028       | 0.005     | 55,257             | $1.93 \times 10^{-8}$  | $3.66 \times 10^{-4}$ | 32                         |
| rs1431196   | A         | G          | 0.572      | -0.032      | 0.005     | 55,140             | $2.65 \times 10^{-11}$ | $5.15 \times 10^{-4}$ | 44                         |
| rs1479405   | C         | T          | 0.678      | -0.031      | 0.005     | 55,492             | $9.85 \times 10^{-10}$ | $4.33 \times 10^{-4}$ | 37                         |
| rs1510719   | T         | C          | 0.617      | 0.039       | 0.005     | 55,373             | $3.84 \times 10^{-15}$ | $7.15 \times 10^{-4}$ | 62                         |
| rs1596747   | A         | G          | 0.506      | -0.031      | 0.005     | 55,670             | $1.00 \times 10^{-10}$ | $4.83 \times 10^{-4}$ | 42                         |
| rs1716171   | C         | T          | 0.210      | -0.038      | 0.006     | 55,381             | $7.82 \times 10^{-11}$ | $4.89 \times 10^{-4}$ | 42                         |
| rs17379561  | A         | T          | 0.856      | -0.053      | 0.007     | 55,522             | $1.08 \times 10^{-14}$ | $6.96 \times 10^{-4}$ | 60                         |
| rs1883842   | T         | G          | 0.721      | -0.031      | 0.005     | 55,209             | $9.27 \times 10^{-9}$  | $3.83 \times 10^{-4}$ | 33                         |
| rs1937450   | T         | G          | 0.462      | -0.032      | 0.005     | 54,639             | $7.07 \times 10^{-11}$ | $4.96 \times 10^{-4}$ | 43                         |
| rs2016933   | C         | G          | 0.270      | 0.031       | 0.005     | 55,414             | $1.04 \times 10^{-8}$  | $3.79 \times 10^{-4}$ | 33                         |
| rs2023878   | C         | T          | 0.808      | 0.036       | 0.006     | 55,227             | $3.04 \times 10^{-9}$  | $4.09 \times 10^{-4}$ | 35                         |
| rs2043539   | G         | A          | 0.581      | -0.027      | 0.005     | 55,631             | $2.24 \times 10^{-8}$  | $3.60 \times 10^{-4}$ | 31                         |
| rs2164300   | C         | T          | 0.477      | 0.026       | 0.005     | 55,075             | $4.13 \times 10^{-8}$  | $3.50 \times 10^{-4}$ | 30                         |
| rs2240326   | G         | A          | 0.526      | 0.047       | 0.005     | 55,674             | $1.13 \times 10^{-22}$ | $1.11 \times 10^{-3}$ | 96                         |

| <b>SNPs</b> | <b>EA</b> | <b>NEA</b> | <b>EAF</b> | <b>Beta</b> | <b>SE</b> | <b>Sample size</b> | <b>P-value</b>         | <b>R<sup>2</sup></b>  | <b>F-statistics</b> |
|-------------|-----------|------------|------------|-------------|-----------|--------------------|------------------------|-----------------------|---------------------|
| rs2396133   | A         | G          | 0.525      | -0.029      | 0.005     | 55,446             | $1.11 \times 10^{-9}$  | $4.30 \times 10^{-4}$ | 37                  |
| rs2396766   | G         | A          | 0.527      | -0.032      | 0.005     | 55,425             | $2.33 \times 10^{-11}$ | $5.17 \times 10^{-4}$ | 45                  |
| rs2734839   | C         | T          | 0.393      | 0.028       | 0.005     | 55,355             | $8.79 \times 10^{-9}$  | $3.84 \times 10^{-4}$ | 33                  |
| rs2744961   | C         | T          | 0.642      | -0.029      | 0.005     | 55,635             | $5.81 \times 10^{-9}$  | $3.92 \times 10^{-4}$ | 34                  |
| rs2834005   | T         | C          | 0.685      | -0.030      | 0.005     | 55,500             | $9.42 \times 10^{-9}$  | $3.81 \times 10^{-4}$ | 33                  |
| rs2838771   | G         | C          | 0.353      | 0.028       | 0.005     | 55,271             | $2.91 \times 10^{-8}$  | $3.61 \times 10^{-4}$ | 31                  |
| rs3766823   | G         | A          | 0.829      | -0.039      | 0.006     | 55,515             | $7.09 \times 10^{-10}$ | $4.40 \times 10^{-4}$ | 38                  |
| rs3793577   | A         | G          | 0.462      | -0.027      | 0.005     | 54,460             | $2.49 \times 10^{-8}$  | $3.63 \times 10^{-4}$ | 31                  |
| rs3828917   | G         | T          | 0.958      | -0.067      | 0.012     | 55,673             | $2.27 \times 10^{-8}$  | $3.61 \times 10^{-4}$ | 31                  |
| rs3863241   | C         | T          | 0.473      | -0.032      | 0.005     | 55,578             | $1.49 \times 10^{-11}$ | $5.27 \times 10^{-4}$ | 46                  |
| rs4382592   | T         | G          | 0.300      | 0.030       | 0.005     | 55,446             | $8.20 \times 10^{-9}$  | $3.85 \times 10^{-4}$ | 33                  |
| rs4713692   | C         | T          | 0.632      | 0.028       | 0.005     | 55,721             | $3.07 \times 10^{-8}$  | $3.55 \times 10^{-4}$ | 31                  |
| rs569356    | A         | G          | 0.859      | 0.038       | 0.007     | 55,601             | $4.07 \times 10^{-8}$  | $3.48 \times 10^{-4}$ | 30                  |
| rs6722661   | G         | A          | 0.635      | 0.032       | 0.005     | 55,396             | $1.15 \times 10^{-10}$ | $4.82 \times 10^{-4}$ | 42                  |
| rs6780459   | A         | T          | 0.253      | -0.031      | 0.006     | 55,576             | $3.14 \times 10^{-8}$  | $3.53 \times 10^{-4}$ | 31                  |
| rs7032155   | C         | A          | 0.408      | -0.028      | 0.005     | 54,863             | $1.63 \times 10^{-8}$  | $3.72 \times 10^{-4}$ | 32                  |
| rs7206608   | C         | G          | 0.677      | -0.029      | 0.005     | 55,434             | $1.46 \times 10^{-8}$  | $3.72 \times 10^{-4}$ | 32                  |
| rs7241572   | G         | A          | 0.791      | -0.037      | 0.006     | 53,887             | $9.49 \times 10^{-10}$ | $4.42 \times 10^{-4}$ | 37                  |
| rs7527682   | A         | G          | 0.463      | 0.027       | 0.005     | 55,547             | $3.13 \times 10^{-8}$  | $3.54 \times 10^{-4}$ | 31                  |
| rs7541875   | A         | G          | 0.574      | -0.027      | 0.005     | 55,810             | $1.61 \times 10^{-8}$  | $3.67 \times 10^{-4}$ | 32                  |
| rs7600261   | C         | T          | 0.694      | -0.034      | 0.005     | 55,531             | $9.47 \times 10^{-11}$ | $4.86 \times 10^{-4}$ | 42                  |
| rs7612999   | G         | A          | 0.755      | -0.031      | 0.006     | 55,396             | $4.90 \times 10^{-8}$  | $3.45 \times 10^{-4}$ | 30                  |
| rs761777    | A         | G          | 0.746      | -0.035      | 0.006     | 55,606             | $4.71 \times 10^{-10}$ | $4.52 \times 10^{-4}$ | 39                  |
| rs7675588   | C         | A          | 0.205      | 0.034       | 0.006     | 55,455             | $1.80 \times 10^{-8}$  | $3.67 \times 10^{-4}$ | 32                  |



| <b>SNPs</b>                                        | <b>EA</b> | <b>NEA</b> | <b>EAF</b> | <b>Beta</b> | <b>SE</b> | <b>Sample size</b> | <b>P-value</b>         | <b>R<sup>2</sup></b>  | <b>F-statistics</b> |
|----------------------------------------------------|-----------|------------|------------|-------------|-----------|--------------------|------------------------|-----------------------|---------------------|
| rs7685686                                          | A         | G          | 0.578      | 0.028       | 0.005     | 55,432             | $1.14 \times 10^{-8}$  | $3.80 \times 10^{-4}$ | 33                  |
| rs773109                                           | G         | A          | 0.665      | 0.038       | 0.005     | 55,447             | $8.71 \times 10^{-14}$ | $6.46 \times 10^{-4}$ | 56                  |
| rs7942368                                          | C         | T          | 0.785      | 0.034       | 0.006     | 53,991             | $9.54 \times 10^{-9}$  | $3.89 \times 10^{-4}$ | 33                  |
| rs903678                                           | G         | A          | 0.661      | -0.028      | 0.005     | 55,569             | $4.89 \times 10^{-8}$  | $3.45 \times 10^{-4}$ | 30                  |
| rs903959                                           | T         | A          | 0.601      | -0.029      | 0.005     | 55,339             | $2.99 \times 10^{-9}$  | $4.08 \times 10^{-4}$ | 35                  |
| rs9372625                                          | G         | A          | 0.617      | 0.038       | 0.005     | 55,150             | $2.62 \times 10^{-14}$ | $6.73 \times 10^{-4}$ | 58                  |
| rs9373363                                          | A         | G          | 0.746      | 0.033       | 0.006     | 54,713             | $4.13 \times 10^{-9}$  | $4.04 \times 10^{-4}$ | 35                  |
| rs9396740                                          | G         | A          | 0.751      | 0.031       | 0.006     | 55,476             | $1.47 \times 10^{-8}$  | $3.71 \times 10^{-4}$ | 32                  |
| rs942065                                           | G         | A          | 0.366      | -0.031      | 0.005     | 55,098             | $8.45 \times 10^{-10}$ | $4.38 \times 10^{-4}$ | 38                  |
| rs9517313                                          | G         | C          | 0.617      | -0.033      | 0.005     | 55,658             | $2.05 \times 10^{-11}$ | $5.18 \times 10^{-4}$ | 45                  |
| rs9529055                                          | G         | A          | 0.524      | -0.027      | 0.005     | 55,506             | $3.11 \times 10^{-8}$  | $3.55 \times 10^{-4}$ | 31                  |
| rs9542729                                          | C         | G          | 0.798      | 0.036       | 0.006     | 55,285             | $1.41 \times 10^{-9}$  | $4.26 \times 10^{-4}$ | 37                  |
| rs9615905                                          | C         | T          | 0.542      | -0.028      | 0.005     | 55,538             | $1.21 \times 10^{-8}$  | $3.77 \times 10^{-4}$ | 32                  |
| rs9636202                                          | G         | A          | 0.733      | 0.035       | 0.005     | 55,069             | $1.51 \times 10^{-10}$ | $4.80 \times 10^{-4}$ | 41                  |
| rs9940128                                          | G         | A          | 0.578      | -0.033      | 0.005     | 55,566             | $8.06 \times 10^{-12}$ | $5.39 \times 10^{-4}$ | 47                  |
| <b>7 SNPs for GRED on FVC, replication cohort</b>  |           |            |            |             |           |                    |                        |                       |                     |
| rs12238219                                         | A         | G          | 0.312      | 0.050       | 0.010     | 375,082            | $4.25 \times 10^{-7}$  | $1.08 \times 10^{-3}$ | 26                  |
| rs13140558                                         | A         | C          | 0.178      | 0.060       | 0.012     | 375,082            | $7.84 \times 10^{-7}$  | $1.04 \times 10^{-3}$ | 24                  |
| rs1549726                                          | G         | A          | 0.371      | 0.049       | 0.009     | 375,082            | $1.80 \times 10^{-7}$  | $1.14 \times 10^{-3}$ | 27                  |
| rs4269485                                          | G         | A          | 0.541      | -0.049      | 0.009     | 375,082            | $1.10 \times 10^{-7}$  | $1.19 \times 10^{-3}$ | 28                  |
| rs4725102                                          | C         | T          | 0.980      | 0.171       | 0.035     | 375,082            | $8.36 \times 10^{-7}$  | $1.16 \times 10^{-3}$ | 24                  |
| rs79348626                                         | A         | G          | 0.017      | 0.179       | 0.033     | 375,082            | $8.79 \times 10^{-8}$  | $1.08 \times 10^{-3}$ | 299                 |
| rs7946110                                          | G         | A          | 0.810      | 0.059       | 0.012     | 375,082            | $5.92 \times 10^{-7}$  | $1.08 \times 10^{-3}$ | 25                  |
| <b>7 SNPs for GRED on DLco, replication cohort</b> |           |            |            |             |           |                    |                        |                       |                     |

| <b>SNPs</b>                                                  | <b>EA</b> | <b>NEA</b> | <b>EAF</b> | <b>Beta</b> | <b>SE</b> | <b>Sample size</b> | <b>P-value</b>        | <b>R<sup>2</sup></b>  | <b>F-statistics</b> |
|--------------------------------------------------------------|-----------|------------|------------|-------------|-----------|--------------------|-----------------------|-----------------------|---------------------|
| rs12238219                                                   | A         | G          | 0.312      | 0.050       | 0.010     | 375,082            | $4.25 \times 10^{-7}$ | $1.08 \times 10^{-3}$ | 26                  |
| rs13140558                                                   | A         | C          | 0.178      | 0.060       | 0.012     | 375,082            | $7.84 \times 10^{-7}$ | $1.04 \times 10^{-3}$ | 24                  |
| rs1549726                                                    | G         | A          | 0.371      | 0.049       | 0.009     | 375,082            | $1.80 \times 10^{-7}$ | $1.14 \times 10^{-3}$ | 27                  |
| rs4269485                                                    | G         | A          | 0.541      | -0.049      | 0.009     | 375,082            | $1.10 \times 10^{-7}$ | $1.19 \times 10^{-3}$ | 28                  |
| rs4725102                                                    | C         | T          | 0.980      | 0.171       | 0.035     | 375,082            | $8.36 \times 10^{-7}$ | $1.16 \times 10^{-3}$ | 24                  |
| rs79348626                                                   | A         | G          | 0.017      | 0.179       | 0.033     | 375,082            | $8.79 \times 10^{-8}$ | $1.08 \times 10^{-3}$ | 299                 |
| rs7946110                                                    | G         | A          | 0.810      | 0.059       | 0.012     | 375,082            | $5.92 \times 10^{-7}$ | $1.08 \times 10^{-3}$ | 25                  |
| <b>7 SNPs for GRED on TFS, replication cohort</b>            |           |            |            |             |           |                    |                       |                       |                     |
| rs13140558                                                   | A         | C          | 0.312      | 0.050       | 0.012     | 375,082            | $7.84 \times 10^{-7}$ | $1.04 \times 10^{-3}$ | 24                  |
| rs1549726                                                    | G         | A          | 0.178      | 0.060       | 0.009     | 375,082            | $1.80 \times 10^{-7}$ | $1.14 \times 10^{-3}$ | 27                  |
| rs36110110                                                   | C         | A          | 0.371      | 0.049       | 0.0766    | 375,082            | $3.86 \times 10^{-7}$ | $9.52 \times 10^{-4}$ | 26                  |
| rs4269485                                                    | G         | A          | 0.541      | -0.049      | 0.009     | 375,082            | $1.10 \times 10^{-7}$ | $1.19 \times 10^{-3}$ | 28                  |
| rs4725102                                                    | C         | T          | 0.980      | 0.171       | 0.036     | 375,082            | $8.36 \times 10^{-7}$ | $1.16 \times 10^{-3}$ | 24                  |
| rs79348626                                                   | A         | G          | 0.017      | 0.179       | 0.033     | 375,082            | $8.79 \times 10^{-8}$ | $1.08 \times 10^{-3}$ | 29                  |
| rs7946110                                                    | G         | A          | 0.801      | 0.059       | 0.012     | 375,082            | $5.92 \times 10^{-7}$ | $1.08 \times 10^{-3}$ | 25                  |
| <b>9 SNPs for GRED on susceptibility, replication cohort</b> |           |            |            |             |           |                    |                       |                       |                     |
| rs10887132                                                   | C         | T          | 0.200      | -0.059      | 0.012     | 375,082            | $3.95 \times 10^{-7}$ | $1.10 \times 10^{-3}$ | 26                  |
| rs12238219                                                   | A         | G          | 0.312      | 0.050       | 0.010     | 375,082            | $4.25 \times 10^{-7}$ | $1.08 \times 10^{-3}$ | 26                  |
| rs13140558                                                   | A         | C          | 0.178      | 0.060       | 0.012     | 375,082            | $7.84 \times 10^{-7}$ | $1.04 \times 10^{-3}$ | 24                  |
| rs1549726                                                    | G         | A          | 0.371      | 0.049       | 0.009     | 375,082            | $1.80 \times 10^{-7}$ | $1.14 \times 10^{-3}$ | 27                  |
| rs36110110                                                   | C         | A          | 0.003      | 0.384       | 0.076     | 375,082            | $3.86 \times 10^{-7}$ | $9.52 \times 10^{-4}$ | 26                  |
| rs4269485                                                    | G         | A          | 0.541      | -0.049      | 0.009     | 375,082            | $1.10 \times 10^{-7}$ | $1.19 \times 10^{-3}$ | 28                  |
| rs4725102                                                    | C         | T          | 0.980      | 0.171       | 0.035     | 375,082            | $8.36 \times 10^{-7}$ | $1.16 \times 10^{-3}$ | 24                  |
| rs79348626                                                   | A         | G          | 0.017      | 0.179       | 0.033     | 375,082            | $8.79 \times 10^{-8}$ | $1.08 \times 10^{-3}$ | 29                  |

| <b>SNPs</b> | <b>EA</b> | <b>NEA</b> | <b>EAF</b> | <b>Beta</b> | <b>SE</b> | <b>Sample size</b> | <b><i>P</i>-value</b> | <b>R<sup>2</sup></b>  | <b><i>F</i>-statistics</b> |
|-------------|-----------|------------|------------|-------------|-----------|--------------------|-----------------------|-----------------------|----------------------------|
| rs7946110   | G         | A          | 0.810      | 0.059       | 0.012     | 375,082            | $5.92 \times 10^{-7}$ | $1.08 \times 10^{-3}$ | 25                         |

A  $P$ -value  $< 5 \times 10^{-8}$  was considered genome-wide significant for discovery cohort ( $P$ -value  $< 1 \times 10^{-6}$  for replication cohort). Abbreviations: SNP: single nucleotide polymorphism; MR: Mendelian randomization; EA: effect allele; NEA: baseline allele; EAF: effect allele frequency; SE: standard error; GERD: gastroesophageal reflux disease; FVC: forced vital capacity; DLco: diffuse lung capacity for carbon monoxide; TFS: transplantation-free survival.

**Table S3 Summary information on outcome SNPs used as genetic instruments for the MR study**

| SNPs                                             | EA | NEA | Sample size | EAF | Beta  | SE   | P-value |
|--------------------------------------------------|----|-----|-------------|-----|-------|------|---------|
| <b>62 SNPs for GRED on FVC, discovery cohort</b> |    |     |             |     |       |      |         |
| rs1011407                                        | A  | G   | 1,048       | 0.9 | 0.0   | 18.2 | 0.987   |
| rs10133111                                       | G  | A   | 1,048       | 0.8 | -1.2  | 14.5 | 0.945   |
| rs1021363                                        | A  | G   | 1,048       | 0.4 | -2.4  | 10.9 | 0.867   |
| rs10837002                                       | C  | G   | 1,048       | 0.7 | -6.0  | 12.1 | 0.613   |
| rs11762636                                       | C  | A   | 1,048       | 0.8 | 14.4  | 14.5 | 0.325   |
| rs12204714                                       | C  | T   | 1,048       | 0.4 | 9.6   | 10.9 | 0.398   |
| rs12453010                                       | C  | T   | 1,048       | 0.6 | -1.2  | 10.9 | 0.936   |
| rs12598916                                       | C  | G   | 1,048       | 0.7 | 20.4  | 12.1 | 0.094   |
| rs12997558                                       | G  | A   | 1,048       | 0.7 | -13.2 | 12.1 | 0.259   |
| rs1334297                                        | G  | A   | 1,048       | 0.3 | 12.0  | 13.3 | 0.363   |
| rs13409451                                       | A  | G   | 1,048       | 0.6 | -1.2  | 10.9 | 0.930   |
| rs1431196                                        | A  | G   | 1,048       | 0.6 | -13.2 | 10.9 | 0.226   |
| rs1592757                                        | G  | C   | 1,048       | 0.6 | -13.2 | 10.9 | 0.247   |
| rs1596747                                        | A  | G   | 1,048       | 0.5 | 8.4   | 10.9 | 0.457   |
| rs1716171                                        | C  | T   | 1,048       | 0.2 | 15.6  | 14.5 | 0.244   |
| rs17379561                                       | A  | T   | 1,048       | 0.9 | 8.4   | 16.9 | 0.610   |
| rs1883842                                        | T  | G   | 1,048       | 0.7 | -1.2  | 12.1 | 0.888   |
| rs1937450                                        | T  | G   | 1,048       | 0.5 | -2.4  | 10.9 | 0.817   |
| rs2016933                                        | C  | G   | 1,048       | 0.3 | 36.0  | 13.3 | 0.005   |
| rs2023878                                        | C  | T   | 1,048       | 0.8 | 7.2   | 14.5 | 0.616   |
| rs2043539                                        | G  | A   | 1,048       | 0.6 | 3.6   | 10.9 | 0.785   |
| rs2164300                                        | C  | T   | 1,048       | 0.5 | -15.6 | 10.9 | 0.169   |
| rs2240326                                        | G  | A   | 1,048       | 0.5 | -18.0 | 12.1 | 0.117   |
| rs2396133                                        | A  | G   | 1,048       | 0.5 | 3.6   | 10.9 | 0.787   |
| rs2396766                                        | G  | A   | 1,048       | 0.5 | -10.8 | 10.9 | 0.340   |
| rs2613505                                        | C  | T   | 1,048       | 0.2 | 1.2   | 14.5 | 0.963   |
| rs2734839                                        | C  | T   | 1,048       | 0.4 | 4.8   | 10.9 | 0.686   |
| rs2744961                                        | C  | T   | 1,048       | 0.6 | 1.2   | 12.1 | 0.909   |
| rs2834005                                        | T  | C   | 1,048       | 0.7 | 6.0   | 12.1 | 0.584   |
| rs2838771                                        | G  | C   | 1,048       | 0.4 | 0.0   | 12.1 | 0.967   |
| rs3766823                                        | G  | A   | 1,048       | 0.8 | 3.6   | 14.5 | 0.794   |
| rs3793577                                        | A  | G   | 1,048       | 0.5 | 1.2   | 10.9 | 0.917   |
| rs3828917                                        | G  | T   | 1,048       | 1.0 | 3.6   | 32.7 | 0.909   |
| rs3863241                                        | C  | T   | 1,048       | 0.4 | 14.4  | 10.9 | 0.201   |
| rs4382592                                        | T  | G   | 1,048       | 0.3 | -12.0 | 12.1 | 0.336   |
| rs4713692                                        | C  | T   | 1,048       | 0.6 | -7.2  | 12.1 | 0.582   |
| rs569356                                         | A  | G   | 1,048       | 0.9 | 8.4   | 16.9 | 0.617   |
| rs6711584                                        | G  | A   | 1,048       | 0.6 | 6.0   | 12.1 | 0.611   |

| SNPs                                              | EA | NEA | Sample size | EAF   | Beta   | SE    | P-value |
|---------------------------------------------------|----|-----|-------------|-------|--------|-------|---------|
| rs6722661                                         | G  | A   | 1,048       | 0.6   | 13.2   | 12.1  | 0.267   |
| rs6780459                                         | A  | T   | 1,048       | 0.2   | 2.4    | 13.3  | 0.863   |
| rs7032155                                         | C  | A   | 1,048       | 0.4   | -1.2   | 10.9  | 0.919   |
| rs7206608                                         | C  | G   | 1,048       | 0.7   | -19.2  | 12.1  | 0.119   |
| rs7241572                                         | G  | A   | 1,048       | 0.8   | 7.2    | 14.5  | 0.610   |
| rs7527682                                         | A  | G   | 1,048       | 0.5   | -12.0  | 12.1  | 0.292   |
| rs7541875                                         | A  | G   | 1,048       | 0.6   | -8.4   | 10.9  | 0.454   |
| rs7600261                                         | C  | T   | 1,048       | 0.7   | -1.2   | 12.1  | 0.941   |
| rs7612999                                         | G  | A   | 1,048       | 0.7   | 10.8   | 13.3  | 0.437   |
| rs761777                                          | A  | G   | 1,048       | 0.7   | -20.4  | 13.3  | 0.116   |
| rs7675588                                         | C  | A   | 1,048       | 0.2   | 7.2    | 13.3  | 0.578   |
| rs7685686                                         | A  | G   | 1,048       | 0.6   | 1.2    | 10.9  | 0.883   |
| rs7942368                                         | C  | T   | 1,048       | 0.8   | -31.2  | 13.3  | 0.024   |
| rs903678                                          | G  | A   | 1,048       | 0.6   | 3.6    | 12.1  | 0.731   |
| rs903959                                          | T  | A   | 1,048       | 0.6   | -4.8   | 10.9  | 0.639   |
| rs9373363                                         | A  | G   | 1,048       | 0.7   | 3.6    | 13.3  | 0.779   |
| rs9396740                                         | G  | A   | 1,048       | 0.7   | -2.4   | 13.3  | 0.882   |
| rs942065                                          | G  | A   | 1,048       | 0.4   | -3.6   | 12.1  | 0.736   |
| rs9517313                                         | G  | C   | 1,048       | 0.6   | -33.6  | 12.1  | 0.003   |
| rs9529055                                         | G  | A   | 1,048       | 0.5   | -10.8  | 12.1  | 0.370   |
| rs9542729                                         | C  | G   | 1,048       | 0.8   | -14.4  | 14.5  | 0.325   |
| rs9615905                                         | C  | T   | 1,048       | 0.5   | 8.4    | 10.9  | 0.438   |
| rs9636202                                         | G  | A   | 1,048       | 0.7   | -4.8   | 12.1  | 0.682   |
| rs9940128                                         | G  | A   | 1,048       | 0.6   | 16.8   | 10.9  | 0.137   |
| <b>61 SNPs for GRED on DLco, discovery cohort</b> |    |     |             |       |        |       |         |
| rs1011407                                         | A  | G   | 729         | 0.891 | -0.073 | 0.042 | 0.082   |
| rs10133111                                        | G  | A   | 729         | 0.831 | -0.002 | 0.035 | 0.931   |
| rs1021363                                         | A  | G   | 729         | 0.368 | 0.028  | 0.026 | 0.304   |
| rs10837002                                        | C  | G   | 729         | 0.665 | -0.047 | 0.028 | 0.089   |
| rs11762636                                        | C  | A   | 729         | 0.831 | -0.005 | 0.035 | 0.886   |
| rs12204714                                        | C  | T   | 729         | 0.372 | 0.043  | 0.026 | 0.106   |
| rs12453010                                        | C  | T   | 729         | 0.574 | -0.024 | 0.028 | 0.388   |
| rs12598916                                        | C  | G   | 729         | 0.728 | 0.026  | 0.029 | 0.349   |
| rs12997558                                        | G  | A   | 729         | 0.665 | 0.000  | 0.028 | 0.992   |
| rs1334297                                         | G  | A   | 729         | 0.262 | 0.052  | 0.031 | 0.093   |
| rs13409451                                        | A  | G   | 654         | 0.596 | 0.058  | 0.028 | 0.037   |
| rs1431196                                         | A  | G   | 729         | 0.561 | -0.061 | 0.028 | 0.031   |
| rs1592757                                         | G  | C   | 729         | 0.626 | -0.036 | 0.026 | 0.172   |
| rs1596747                                         | A  | G   | 729         | 0.511 | 0.036  | 0.025 | 0.164   |
| rs1716171                                         | C  | T   | 729         | 0.189 | 0.030  | 0.034 | 0.362   |
| rs17379561                                        | A  | T   | 654         | 0.856 | -0.006 | 0.042 | 0.876   |
| rs1883842                                         | T  | G   | 729         | 0.722 | 0.016  | 0.029 | 0.583   |

| <b>SNPs</b> | <b>EA</b> | <b>NEA</b> | <b>Sample size</b> | <b>EAF</b> | <b>Beta</b> | <b>SE</b> | <b>P-value</b> |
|-------------|-----------|------------|--------------------|------------|-------------|-----------|----------------|
| rs1937450   | T         | G          | 729                | 0.457      | -0.031      | 0.028     | 0.251          |
| rs2016933   | C         | G          | 654                | 0.277      | 0.043       | 0.032     | 0.187          |
| rs2023878   | C         | T          | 729                | 0.828      | 0.020       | 0.036     | 0.563          |
| rs2043539   | G         | A          | 729                | 0.590      | 0.019       | 0.026     | 0.477          |
| rs2164300   | C         | T          | 729                | 0.469      | -0.038      | 0.026     | 0.142          |
| rs2240326   | G         | A          | 729                | 0.532      | -0.022      | 0.026     | 0.406          |
| rs2396133   | A         | G          | 729                | 0.494      | -0.026      | 0.023     | 0.261          |
| rs2396766   | G         | A          | 729                | 0.523      | 0.017       | 0.026     | 0.535          |
| rs2613505   | C         | T          | 729                | 0.192      | -0.038      | 0.034     | 0.250          |
| rs2734839   | C         | T          | 729                | 0.388      | 0.050       | 0.028     | 0.062          |
| rs2744961   | C         | T          | 729                | 0.614      | 0.038       | 0.028     | 0.157          |
| rs2834005   | T         | C          | 729                | 0.703      | -0.032      | 0.028     | 0.256          |
| rs2838771   | G         | C          | 729                | 0.363      | 0.031       | 0.028     | 0.273          |
| rs3766823   | G         | A          | 729                | 0.821      | -0.004      | 0.035     | 0.926          |
| rs3793577   | A         | G          | 729                | 0.473      | -0.018      | 0.023     | 0.434          |
| rs3828917   | G         | T          | 729                | 0.970      | -0.030      | 0.082     | 0.716          |
| rs3863241   | C         | T          | 729                | 0.452      | -0.001      | 0.025     | 0.981          |
| rs4382592   | T         | G          | 729                | 0.295      | -0.041      | 0.029     | 0.150          |
| rs4713692   | C         | T          | 729                | 0.642      | -0.043      | 0.030     | 0.148          |
| rs569356    | A         | G          | 729                | 0.875      | 0.025       | 0.041     | 0.524          |
| rs6711584   | G         | A          | 729                | 0.546      | 0.004       | 0.028     | 0.904          |
| rs6722661   | G         | A          | 729                | 0.632      | -0.012      | 0.029     | 0.684          |
| rs6780459   | A         | T          | 729                | 0.227      | 0.010       | 0.030     | 0.750          |
| rs7032155   | C         | A          | 729                | 0.404      | 0.013       | 0.026     | 0.613          |
| rs7206608   | C         | G          | 729                | 0.671      | 0.000       | 0.030     | 0.998          |
| rs7241572   | G         | A          | 729                | 0.805      | -0.004      | 0.035     | 0.927          |
| rs7527682   | A         | G          | 729                | 0.472      | 0.017       | 0.028     | 0.526          |
| rs7541875   | A         | G          | 729                | 0.584      | 0.006       | 0.026     | 0.822          |
| rs7600261   | C         | T          | 729                | 0.705      | -0.028      | 0.029     | 0.341          |
| rs7612999   | G         | A          | 729                | 0.749      | 0.029       | 0.031     | 0.367          |
| rs761777    | A         | G          | 729                | 0.729      | -0.012      | 0.030     | 0.681          |
| rs7675588   | C         | A          | 654                | 0.224      | 0.008       | 0.034     | 0.789          |
| rs7685686   | A         | G          | 729                | 0.559      | -0.022      | 0.026     | 0.421          |
| rs7942368   | C         | T          | 654                | 0.779      | -0.036      | 0.035     | 0.308          |
| rs903678    | G         | A          | 654                | 0.646      | -0.032      | 0.029     | 0.259          |
| rs903959    | T         | A          | 729                | 0.609      | 0.036       | 0.026     | 0.170          |
| rs9373363   | A         | G          | 654                | 0.746      | 0.016       | 0.031     | 0.610          |
| rs9396740   | G         | A          | 729                | 0.762      | 0.036       | 0.031     | 0.249          |
| rs942065    | G         | A          | 729                | 0.357      | 0.013       | 0.026     | 0.638          |
| rs9529055   | G         | A          | 729                | 0.522      | 0.061       | 0.028     | 0.026          |
| rs9542729   | C         | G          | 729                | 0.829      | -0.029      | 0.035     | 0.401          |
| rs9615905   | C         | T          | 654                | 0.543      | 0.016       | 0.029     | 0.580          |

| SNPs                                             | EA | NEA | Sample size | EAF   | Beta   | SE    | P-value |
|--------------------------------------------------|----|-----|-------------|-------|--------|-------|---------|
| rs9636202                                        | G  | A   | 729         | 0.729 | 0.040  | 0.030 | 0.188   |
| rs9940128                                        | G  | A   | 729         | 0.574 | 0.023  | 0.026 | 0.403   |
| <b>60 SNPs for GRED on TFS, discovery cohort</b> |    |     |             |       |        |       |         |
| rs1011407                                        | A  | G   | 1,481       | 0.895 | 0.066  | 0.081 | 0.413   |
| rs10133111                                       | G  | A   | 1,481       | 0.823 | -0.096 | 0.066 | 0.145   |
| rs1021363                                        | A  | G   | 1,481       | 0.378 | 0.044  | 0.052 | 0.398   |
| rs10837002                                       | C  | G   | 1,481       | 0.663 | -0.013 | 0.052 | 0.800   |
| rs11762636                                       | C  | A   | 1,481       | 0.823 | -0.098 | 0.065 | 0.134   |
| rs11953061                                       | C  | T   | 1,481       | 0.677 | -0.001 | 0.052 | 0.992   |
| rs12204714                                       | C  | T   | 1,481       | 0.365 | -0.010 | 0.052 | 0.853   |
| rs12453010                                       | C  | T   | 1,481       | 0.584 | -0.014 | 0.052 | 0.782   |
| rs12598916                                       | C  | G   | 1,481       | 0.713 | -0.001 | 0.057 | 0.984   |
| rs12997558                                       | G  | A   | 1,481       | 0.641 | 0.045  | 0.054 | 0.410   |
| rs1334297                                        | G  | A   | 1,481       | 0.261 | -0.127 | 0.060 | 0.035   |
| rs13409451                                       | A  | G   | 1,481       | 0.610 | 0.041  | 0.053 | 0.441   |
| rs1431196                                        | A  | G   | 1,481       | 0.577 | 0.010  | 0.052 | 0.848   |
| rs1592757                                        | G  | C   | 1,481       | 0.642 | 0.009  | 0.053 | 0.872   |
| rs1596747                                        | A  | G   | 1,481       | 0.489 | 0.023  | 0.050 | 0.647   |
| rs1716171                                        | C  | T   | 1,481       | 0.191 | -0.068 | 0.066 | 0.306   |
| rs17379561                                       | A  | T   | 1,481       | 0.867 | 0.044  | 0.070 | 0.532   |
| rs1883842                                        | T  | G   | 1,481       | 0.725 | 0.090  | 0.058 | 0.120   |
| rs1937450                                        | T  | G   | 1,481       | 0.427 | -0.044 | 0.052 | 0.396   |
| rs2016933                                        | C  | G   | 1,481       | 0.275 | 0.114  | 0.059 | 0.052   |
| rs2023878                                        | C  | T   | 1,481       | 0.818 | -0.048 | 0.065 | 0.463   |
| rs2043539                                        | G  | A   | 1,481       | 0.593 | 0.014  | 0.051 | 0.780   |
| rs2106353                                        | G  | T   | 1,481       | 0.770 | 0.043  | 0.062 | 0.483   |
| rs2164300                                        | C  | T   | 1,481       | 0.442 | -0.005 | 0.052 | 0.930   |
| rs2240326                                        | G  | A   | 1,481       | 0.521 | 0.045  | 0.051 | 0.377   |
| rs2396133                                        | A  | G   | 1,481       | 0.520 | 0.039  | 0.050 | 0.436   |
| rs2396766                                        | G  | A   | 1,481       | 0.527 | -0.024 | 0.051 | 0.639   |
| rs2613505                                        | C  | T   | 1,481       | 0.188 | 0.013  | 0.066 | 0.846   |
| rs2734839                                        | C  | T   | 1,481       | 0.381 | -0.039 | 0.052 | 0.451   |
| rs2744961                                        | C  | T   | 1,481       | 0.610 | 0.050  | 0.053 | 0.347   |
| rs2834005                                        | T  | C   | 1,481       | 0.699 | -0.031 | 0.056 | 0.575   |
| rs2838771                                        | G  | C   | 1,481       | 0.374 | -0.009 | 0.054 | 0.864   |
| rs3766823                                        | G  | A   | 1,481       | 0.799 | -0.057 | 0.065 | 0.384   |
| rs3828917                                        | G  | T   | 1,481       | 0.965 | -0.342 | 0.124 | 0.006   |
| rs3863241                                        | C  | T   | 1,481       | 0.479 | 0.055  | 0.051 | 0.287   |
| rs4713692                                        | C  | T   | 1,481       | 0.622 | 0.032  | 0.054 | 0.556   |
| rs569356                                         | A  | G   | 1,481       | 0.869 | 0.043  | 0.072 | 0.555   |
| rs6711584                                        | G  | A   | 1,481       | 0.522 | -0.077 | 0.052 | 0.139   |
| rs6722661                                        | G  | A   | 1,481       | 0.658 | -0.015 | 0.053 | 0.783   |

| SNPs                                                        | EA | NEA | Sample size | EAF   | Beta   | SE    | P-value |
|-------------------------------------------------------------|----|-----|-------------|-------|--------|-------|---------|
| rs6780459                                                   | A  | T   | 1,481       | 0.216 | -0.064 | 0.058 | 0.275   |
| rs7206608                                                   | C  | G   | 1,481       | 0.673 | -0.011 | 0.055 | 0.847   |
| rs7241572                                                   | G  | A   | 1,481       | 0.793 | 0.046  | 0.065 | 0.478   |
| rs7527682                                                   | A  | G   | 1,481       | 0.440 | -0.006 | 0.051 | 0.901   |
| rs7541875                                                   | A  | G   | 1,481       | 0.577 | 0.035  | 0.051 | 0.495   |
| rs7600261                                                   | C  | T   | 1,481       | 0.690 | 0.067  | 0.055 | 0.226   |
| rs7612999                                                   | G  | A   | 1,481       | 0.738 | 0.021  | 0.058 | 0.717   |
| rs761777                                                    | A  | G   | 1,481       | 0.748 | -0.096 | 0.061 | 0.116   |
| rs7675588                                                   | C  | A   | 1,481       | 0.209 | -0.048 | 0.061 | 0.429   |
| rs7685686                                                   | A  | G   | 1,481       | 0.565 | -0.016 | 0.051 | 0.753   |
| rs7942368                                                   | C  | T   | 1,481       | 0.805 | 0.023  | 0.061 | 0.711   |
| rs903678                                                    | G  | A   | 1,481       | 0.643 | 0.047  | 0.055 | 0.396   |
| rs9373363                                                   | A  | G   | 1,481       | 0.735 | -0.050 | 0.059 | 0.390   |
| rs9396740                                                   | G  | A   | 1,481       | 0.774 | -0.066 | 0.060 | 0.273   |
| rs942065                                                    | G  | A   | 1,481       | 0.355 | 0.048  | 0.054 | 0.368   |
| rs9517313                                                   | G  | C   | 1,481       | 0.633 | 0.024  | 0.053 | 0.650   |
| rs9529055                                                   | G  | A   | 1,481       | 0.532 | 0.018  | 0.052 | 0.723   |
| rs9542729                                                   | C  | G   | 1,481       | 0.822 | 0.062  | 0.063 | 0.325   |
| rs9615905                                                   | C  | T   | 1,481       | 0.551 | 0.080  | 0.054 | 0.140   |
| rs9636202                                                   | G  | A   | 1,481       | 0.715 | -0.081 | 0.060 | 0.176   |
| rs9940128                                                   | G  | A   | 1,481       | 0.580 | 0.006  | 0.052 | 0.908   |
| <b>75 SNPs for GRED on susceptibility, discovery cohort</b> |    |     |             |       |        |       |         |
| rs10010963                                                  | C  | T   | 24,589      | 0.385 | 0.020  | 0.028 | 0.470   |
| rs1011407                                                   | A  | G   | 24,589      | 0.881 | 0.145  | 0.043 | 0.001   |
| rs10133111                                                  | G  | A   | 24,589      | 0.169 | -0.080 | 0.035 | 0.024   |
| rs1021363                                                   | A  | G   | 22,051      | 0.643 | 0.016  | 0.031 | 0.605   |
| rs10837002                                                  | C  | G   | 24,589      | 0.647 | -0.006 | 0.029 | 0.847   |
| rs11762636                                                  | C  | A   | 24,589      | 0.188 | 0.004  | 0.034 | 0.912   |
| rs12204714                                                  | C  | T   | 22,051      | 0.360 | 0.002  | 0.031 | 0.959   |
| rs12357321                                                  | G  | A   | 24,589      | 0.322 | 0.009  | 0.029 | 0.759   |
| rs12453010                                                  | C  | T   | 22,051      | 0.397 | -0.048 | 0.030 | 0.116   |
| rs12598916                                                  | C  | G   | 24,589      | 0.723 | 0.000  | 0.030 | 0.990   |
| rs12967855                                                  | A  | G   | 24,589      | 0.671 | 0.042  | 0.029 | 0.146   |
| rs12997558                                                  | G  | A   | 24,589      | 0.355 | 0.014  | 0.028 | 0.621   |
| rs13107325                                                  | C  | T   | 24,589      | 0.075 | -0.011 | 0.051 | 0.838   |
| rs1334297                                                   | G  | A   | 24,589      | 0.262 | 0.020  | 0.031 | 0.517   |
| rs13409451                                                  | A  | G   | 22,051      | 0.613 | -0.022 | 0.030 | 0.475   |
| rs1431196                                                   | A  | G   | 24,589      | 0.569 | 0.002  | 0.027 | 0.930   |
| rs1479405                                                   | C  | T   | 24,589      | 0.323 | -0.047 | 0.029 | 0.106   |
| rs1510719                                                   | T  | C   | 24,589      | 0.621 | -0.008 | 0.028 | 0.776   |
| rs1592757                                                   | G  | C   | 24,589      | 0.642 | 0.036  | 0.028 | 0.205   |
| rs1596747                                                   | A  | G   | 24,589      | 0.509 | 0.000  | 0.027 | 0.988   |



| <b>SNPs</b> | <b>EA</b> | <b>NEA</b> | <b>Sample size</b> | <b>EAF</b> | <b>Beta</b> | <b>SE</b> | <b>P-value</b> |
|-------------|-----------|------------|--------------------|------------|-------------|-----------|----------------|
| rs1716171   | C         | T          | 24,589             | 0.210      | -0.071      | 0.033     | 0.032          |
| rs17379561  | A         | T          | 24,589             | 0.857      | -0.091      | 0.038     | 0.019          |
| rs1883842   | T         | G          | 24,589             | 0.726      | -0.012      | 0.030     | 0.686          |
| rs1937450   | T         | G          | 24,589             | 0.534      | -0.060      | 0.027     | 0.030          |
| rs2016933   | C         | G          | 24,589             | 0.277      | -0.049      | 0.030     | 0.101          |
| rs2023878   | C         | T          | 24,589             | 0.190      | 0.023       | 0.035     | 0.502          |
| rs2043539   | G         | A          | 24,589             | 0.418      | 0.012       | 0.028     | 0.669          |
| rs215614    | G         | A          | 24,589             | 0.373      | 0.017       | 0.028     | 0.549          |
| rs2164300   | C         | T          | 24,589             | 0.484      | -0.052      | 0.027     | 0.058          |
| rs2240326   | G         | A          | 24,589             | 0.483      | 0.022       | 0.027     | 0.425          |
| rs2396133   | A         | G          | 24,589             | 0.527      | -0.041      | 0.027     | 0.131          |
| rs2396766   | G         | A          | 24,589             | 0.462      | 0.012       | 0.027     | 0.672          |
| rs2613505   | C         | T          | 24,589             | 0.187      | -0.029      | 0.035     | 0.413          |
| rs2734839   | C         | T          | 24,589             | 0.389      | -0.003      | 0.028     | 0.917          |
| rs2744961   | C         | T          | 24,589             | 0.368      | -0.068      | 0.028     | 0.015          |
| rs2782641   | G         | A          | 24,589             | 0.385      | -0.045      | 0.028     | 0.108          |
| rs2834005   | T         | C          | 22,051             | 0.686      | 0.006       | 0.032     | 0.847          |
| rs2838771   | G         | C          | 24,589             | 0.349      | -0.019      | 0.029     | 0.511          |
| rs324769    | C         | T          | 24,589             | 0.446      | -0.001      | 0.028     | 0.965          |
| rs329122    | G         | A          | 24,589             | 0.418      | 0.004       | 0.028     | 0.896          |
| rs3766823   | G         | A          | 24,589             | 0.176      | 0.028       | 0.036     | 0.437          |
| rs3793577   | A         | G          | 24,589             | 0.535      | 0.010       | 0.027     | 0.726          |
| rs3828917   | G         | T          | 22,051             | 0.040      | 0.046       | 0.077     | 0.550          |
| rs3863241   | C         | T          | 24,589             | 0.462      | -0.037      | 0.027     | 0.173          |
| rs4300861   | C         | T          | 24,589             | 0.379      | -0.041      | 0.028     | 0.141          |
| rs4382592   | T         | G          | 24,589             | 0.694      | -0.030      | 0.029     | 0.299          |
| rs4713692   | C         | T          | 24,589             | 0.358      | -0.029      | 0.028     | 0.300          |
| rs569356    | A         | G          | 24,589             | 0.859      | 0.034       | 0.039     | 0.385          |
| rs6711584   | G         | A          | 24,589             | 0.457      | 0.030       | 0.028     | 0.271          |
| rs6722661   | G         | A          | 24,589             | 0.358      | 0.048       | 0.028     | 0.088          |
| rs6780459   | A         | T          | 24,589             | 0.255      | 0.043       | 0.031     | 0.164          |
| rs7032155   | C         | A          | 24,589             | 0.401      | -0.009      | 0.028     | 0.741          |
| rs7206608   | C         | G          | 24,589             | 0.679      | -0.028      | 0.029     | 0.332          |
| rs7241572   | G         | A          | 24,589             | 0.202      | 0.004       | 0.034     | 0.916          |
| rs7527682   | A         | G          | 24,589             | 0.538      | -0.030      | 0.027     | 0.273          |
| rs7541875   | A         | G          | 24,589             | 0.579      | -0.024      | 0.028     | 0.393          |
| rs7600261   | C         | T          | 24,589             | 0.302      | 0.023       | 0.030     | 0.437          |
| rs7612999   | G         | A          | 24,589             | 0.249      | -0.023      | 0.031     | 0.468          |
| rs761777    | A         | G          | 24,589             | 0.740      | -0.008      | 0.031     | 0.788          |
| rs7675588   | C         | A          | 24,589             | 0.207      | 0.022       | 0.033     | 0.517          |
| rs7685686   | A         | G          | 24,589             | 0.577      | -0.057      | 0.028     | 0.037          |
| rs773109    | G         | A          | 24,589             | 0.329      | 0.015       | 0.029     | 0.615          |

| SNPs                                                                                       | EA | NEA | Sample size | EAF   | Beta   | SE    | P-value |
|--------------------------------------------------------------------------------------------|----|-----|-------------|-------|--------|-------|---------|
| rs7942368                                                                                  | C  | T   | 24,589      | 0.219 | -0.020 | 0.033 | 0.548   |
| rs903678                                                                                   | G  | A   | 24,589      | 0.335 | -0.010 | 0.029 | 0.737   |
| rs903959                                                                                   | T  | A   | 24,589      | 0.604 | 0.003  | 0.028 | 0.923   |
| rs9372625                                                                                  | G  | A   | 24,589      | 0.381 | -0.023 | 0.028 | 0.404   |
| rs9373363                                                                                  | A  | G   | 24,589      | 0.754 | -0.044 | 0.032 | 0.161   |
| rs9396740                                                                                  | G  | A   | 24,589      | 0.252 | -0.032 | 0.031 | 0.297   |
| rs942065                                                                                   | G  | A   | 22,051      | 0.364 | -0.057 | 0.031 | 0.064   |
| rs9517313                                                                                  | G  | C   | 22,051      | 0.620 | -0.026 | 0.030 | 0.401   |
| rs9529055                                                                                  | G  | A   | 24,589      | 0.482 | 0.008  | 0.027 | 0.780   |
| rs9542729                                                                                  | C  | G   | 22,051      | 0.800 | 0.079  | 0.037 | 0.034   |
| rs9615905                                                                                  | C  | T   | 24,589      | 0.452 | 0.008  | 0.027 | 0.780   |
| rs9636202                                                                                  | G  | A   | 24,589      | 0.262 | -0.005 | 0.031 | 0.875   |
| rs9940128                                                                                  | G  | A   | 24,589      | 0.428 | 0.019  | 0.027 | 0.495   |
| <b>63 SNPs for GRED on susceptibility (excluded confounding factors), discovery cohort</b> |    |     |             |       |        |       |         |
| rs10133111                                                                                 | G  | A   | 24,589      | 0.169 | -0.080 | 0.035 | 0.024   |
| rs1021363                                                                                  | A  | G   | 22,051      | 0.643 | 0.016  | 0.031 | 0.605   |
| rs10837002                                                                                 | C  | G   | 24,589      | 0.647 | -0.006 | 0.029 | 0.847   |
| rs11762636                                                                                 | C  | A   | 24,589      | 0.188 | 0.004  | 0.034 | 0.912   |
| rs12204714                                                                                 | C  | T   | 22,051      | 0.360 | 0.002  | 0.031 | 0.959   |
| rs12453010                                                                                 | C  | T   | 22,051      | 0.397 | -0.048 | 0.030 | 0.116   |
| rs12598916                                                                                 | C  | G   | 24,589      | 0.723 | 0.000  | 0.030 | 0.990   |
| rs12997558                                                                                 | G  | A   | 24,589      | 0.355 | 0.014  | 0.028 | 0.621   |
| rs13107325                                                                                 | C  | T   | 24,589      | 0.075 | -0.011 | 0.051 | 0.838   |
| rs1334297                                                                                  | G  | A   | 24,589      | 0.262 | 0.020  | 0.031 | 0.517   |
| rs13409451                                                                                 | A  | G   | 22,051      | 0.613 | -0.022 | 0.030 | 0.475   |
| rs1431196                                                                                  | A  | G   | 24,589      | 0.569 | 0.002  | 0.027 | 0.930   |
| rs1479405                                                                                  | C  | T   | 24,589      | 0.323 | -0.047 | 0.029 | 0.106   |
| rs1510719                                                                                  | T  | C   | 24,589      | 0.621 | -0.008 | 0.028 | 0.776   |
| rs1596747                                                                                  | A  | G   | 24,589      | 0.509 | 0.000  | 0.027 | 0.988   |
| rs1716171                                                                                  | C  | T   | 24,589      | 0.210 | -0.071 | 0.033 | 0.032   |
| rs17379561                                                                                 | A  | T   | 24,589      | 0.857 | -0.091 | 0.038 | 0.019   |
| rs1883842                                                                                  | T  | G   | 24,589      | 0.726 | -0.012 | 0.030 | 0.686   |
| rs1937450                                                                                  | T  | G   | 24,589      | 0.534 | -0.060 | 0.027 | 0.030   |
| rs2016933                                                                                  | C  | G   | 24,589      | 0.277 | -0.049 | 0.030 | 0.101   |
| rs2023878                                                                                  | C  | T   | 24,589      | 0.190 | 0.023  | 0.035 | 0.502   |
| rs2043539                                                                                  | G  | A   | 24,589      | 0.418 | 0.012  | 0.028 | 0.669   |
| rs2164300                                                                                  | C  | T   | 24,589      | 0.484 | -0.052 | 0.027 | 0.058   |
| rs2240326                                                                                  | G  | A   | 24,589      | 0.483 | 0.022  | 0.027 | 0.425   |
| rs2396133                                                                                  | A  | G   | 24,589      | 0.527 | -0.041 | 0.027 | 0.131   |
| rs2396766                                                                                  | G  | A   | 24,589      | 0.462 | 0.012  | 0.027 | 0.672   |

| SNPs                                              | EA | NEA | Sample size | EAF   | Beta   | SE    | P-value |
|---------------------------------------------------|----|-----|-------------|-------|--------|-------|---------|
| rs2734839                                         | C  | T   | 24,589      | 0.389 | -0.003 | 0.028 | 0.917   |
| rs2744961                                         | C  | T   | 24,589      | 0.368 | -0.068 | 0.028 | 0.015   |
| rs2834005                                         | T  | C   | 22,051      | 0.686 | 0.006  | 0.032 | 0.847   |
| rs2838771                                         | G  | C   | 24,589      | 0.349 | -0.019 | 0.029 | 0.511   |
| rs3766823                                         | G  | A   | 24,589      | 0.176 | 0.028  | 0.036 | 0.437   |
| rs3793577                                         | A  | G   | 24,589      | 0.535 | 0.010  | 0.027 | 0.726   |
| rs3828917                                         | G  | T   | 22,051      | 0.040 | 0.046  | 0.077 | 0.550   |
| rs3863241                                         | C  | T   | 24,589      | 0.462 | -0.037 | 0.027 | 0.173   |
| rs4382592                                         | T  | G   | 24,589      | 0.694 | -0.030 | 0.029 | 0.299   |
| rs4713692                                         | C  | T   | 24,589      | 0.358 | -0.029 | 0.028 | 0.300   |
| rs569356                                          | A  | G   | 24,589      | 0.859 | 0.034  | 0.039 | 0.385   |
| rs6722661                                         | G  | A   | 24,589      | 0.358 | 0.048  | 0.028 | 0.088   |
| rs6780459                                         | A  | T   | 24,589      | 0.255 | 0.043  | 0.031 | 0.164   |
| rs7032155                                         | C  | A   | 24,589      | 0.401 | -0.009 | 0.028 | 0.741   |
| rs7206608                                         | C  | G   | 24,589      | 0.679 | -0.028 | 0.029 | 0.332   |
| rs7241572                                         | G  | A   | 24,589      | 0.202 | 0.004  | 0.034 | 0.916   |
| rs7527682                                         | A  | G   | 24,589      | 0.538 | -0.030 | 0.027 | 0.273   |
| rs7541875                                         | A  | G   | 24,589      | 0.579 | -0.024 | 0.028 | 0.393   |
| rs7600261                                         | C  | T   | 24,589      | 0.302 | 0.023  | 0.030 | 0.437   |
| rs7612999                                         | G  | A   | 24,589      | 0.249 | -0.023 | 0.031 | 0.468   |
| rs761777                                          | A  | G   | 24,589      | 0.740 | -0.008 | 0.031 | 0.788   |
| rs7675588                                         | C  | A   | 24,589      | 0.207 | 0.022  | 0.033 | 0.517   |
| rs7685686                                         | A  | G   | 24,589      | 0.577 | -0.057 | 0.028 | 0.037   |
| rs773109                                          | G  | A   | 24,589      | 0.329 | 0.015  | 0.029 | 0.615   |
| rs7942368                                         | C  | T   | 24,589      | 0.219 | -0.020 | 0.033 | 0.548   |
| rs903678                                          | G  | A   | 24,589      | 0.335 | -0.010 | 0.029 | 0.737   |
| rs903959                                          | T  | A   | 24,589      | 0.604 | 0.003  | 0.028 | 0.923   |
| rs9372625                                         | G  | A   | 24,589      | 0.381 | -0.023 | 0.028 | 0.404   |
| rs9373363                                         | A  | G   | 24,589      | 0.754 | -0.044 | 0.032 | 0.161   |
| rs9396740                                         | G  | A   | 24,589      | 0.252 | -0.032 | 0.031 | 0.297   |
| rs942065                                          | G  | A   | 22,051      | 0.364 | -0.057 | 0.031 | 0.064   |
| rs9517313                                         | G  | C   | 22,051      | 0.620 | -0.026 | 0.030 | 0.401   |
| rs9529055                                         | G  | A   | 24,589      | 0.482 | 0.008  | 0.027 | 0.780   |
| rs9542729                                         | C  | G   | 22,051      | 0.800 | 0.079  | 0.037 | 0.034   |
| rs9615905                                         | C  | T   | 24,589      | 0.452 | 0.008  | 0.027 | 0.780   |
| rs9636202                                         | G  | A   | 24,589      | 0.262 | -0.005 | 0.031 | 0.875   |
| rs9940128                                         | G  | A   | 24,589      | 0.428 | 0.019  | 0.027 | 0.495   |
| <b>7 SNPs for GRED on FVC, replication cohort</b> |    |     |             |       |        |       |         |
| rs12238219                                        | A  | G   | 1,048       | 0.245 | -2.4   | 13.31 | 0.846   |
| rs13140558                                        | A  | C   | 1,048       | 0.229 | -7.2   | 13.31 | 0.579   |
| rs1549726                                         | G  | A   | 1,048       | 0.373 | 2.4    | 12.1  | 0.827   |
| rs4269485                                         | G  | A   | 1,048       | 0.692 | -3.6   | 12.1  | 0.722   |

| SNPs                                                         | EA | NEA | Sample size | EAF   | Beta   | SE    | P-value |
|--------------------------------------------------------------|----|-----|-------------|-------|--------|-------|---------|
| rs4725102                                                    | C  | T   | 906         | 0.979 | -2.4   | 47.19 | 0.962   |
| rs79348626                                                   | A  | G   | 1,048       | 0.023 | -22.8  | 37.51 | 0.554   |
| rs7946110                                                    | G  | A   | 1,048       | 0.836 | -18    | 15.73 | 0.250   |
| <b>7 SNPs for GRED on DLco, replication cohort</b>           |    |     |             |       |        |       |         |
| rs12238219                                                   | A  | G   | 729         | 0.249 | 0.043  | 0.032 | 0.178   |
| rs13140558                                                   | A  | C   | 729         | 0.232 | 0.037  | 0.032 | 0.250   |
| rs1549726                                                    | G  | A   | 729         | 0.378 | 0.006  | 0.028 | 0.837   |
| rs4269485                                                    | G  | A   | 729         | 0.704 | -0.041 | 0.028 | 0.147   |
| rs4725102                                                    | C  | T   | 654         | 0.977 | -0.078 | 0.104 | 0.453   |
| rs79348626                                                   | A  | G   | 654         | 0.025 | 0.101  | 0.100 | 0.313   |
| rs7946110                                                    | G  | A   | 729         | 0.840 | -0.036 | 0.037 | 0.328   |
| <b>7 SNPs for GRED on TFS, replication cohort</b>            |    |     |             |       |        |       |         |
| rs13140558                                                   | A  | C   | 1,481       | 0.245 | 0.007  | 0.063 | 0.915   |
| rs1549726                                                    | G  | A   | 1,481       | 0.391 | -0.014 | 0.052 | 0.790   |
| rs36110110                                                   | C  | A   | 1,481       | 0.012 | -0.141 | 0.278 | 0.612   |
| rs4269485                                                    | G  | A   | 1,481       | 0.711 | 0.037  | 0.054 | 0.495   |
| rs4725102                                                    | C  | T   | 1,481       | 0.982 | 0.034  | 0.238 | 0.887   |
| rs79348626                                                   | A  | G   | 1,481       | 0.019 | 0.070  | 0.171 | 0.683   |
| rs7946110                                                    | G  | A   | 1,481       | 0.839 | 0.039  | 0.071 | 0.584   |
| <b>9 SNPs for GRED on susceptibility, replication cohort</b> |    |     |             |       |        |       |         |
| rs10887132                                                   | C  | T   | 346,571     | 0.200 | 0.073  | 0.040 | 0.068   |
| rs12238219                                                   | A  | G   | 346,571     | 0.312 | -0.053 | 0.034 | 0.126   |
| rs13140558                                                   | A  | C   | 346,571     | 0.178 | -0.006 | 0.042 | 0.894   |
| rs1549726                                                    | G  | A   | 346,571     | 0.372 | 0.002  | 0.033 | 0.960   |
| rs36110110                                                   | C  | A   | 346,571     | 0.003 | -0.395 | 0.309 | 0.201   |
| rs4269485                                                    | G  | A   | 346,571     | 0.540 | -0.038 | 0.032 | 0.236   |
| rs4725102                                                    | C  | T   | 346,571     | 0.980 | -0.080 | 0.114 | 0.485   |
| rs79348626                                                   | A  | G   | 346,571     | 0.017 | -0.091 | 0.124 | 0.462   |
| rs7946110                                                    | G  | A   | 346,571     | 0.810 | -0.058 | 0.041 | 0.150   |

A  $P$ -value  $< 5 \times 10^{-6}$  was considered genome-wide significant and should be excluded to meet the assumption that requires instruments to be associated with the outcome only through exposure. Abbreviations: SNP: single nucleotide polymorphism; MR: Mendelian randomization; EA: effect allele; NEA: baseline allele; EAF: effect allele frequency; SE: standard error; GERD: gastroesophageal reflux disease; FVC: forced vital capacity; DLco: diffuse lung capacity for carbon monoxide; TFS: transplantation-free survival.

**Table S4 The heterogeneity and pleiotropy analysis based on three different statistical methods**

| Exposure                        | Outcomes                                         | Cochran's Q statistic |         |        |         | MR-PRESSO | MR-Egger intercept analysis |
|---------------------------------|--------------------------------------------------|-----------------------|---------|--------|---------|-----------|-----------------------------|
|                                 |                                                  | MR-Egger              |         | IVW    |         |           |                             |
|                                 |                                                  | Q                     | P-value | Q      | P-value | P-value   | P-value                     |
| GERD<br>(discovery<br>cohort)   | FVC                                              | 56.033                | 0.621   | 56.262 | 0.648   | 0.645     | 0.634                       |
|                                 | DLCO                                             | 68.084                | 0.196   | 68.145 | 0.220   | 0.228     | 0.818                       |
|                                 | TFS                                              | 50.860                | 0.736   | 52.876 | 0.699   | 0.710     | 0.161                       |
|                                 | Susceptibility                                   | 89.195                | 0.096   | 93.889 | 0.0592  | 0.054     | 0.054                       |
|                                 | Susceptibility (excluded<br>confounding factors) | 70.084                | 0.199   | 73.762 | 0.146   | 0.123     | 0.079                       |
| GERD<br>(replication<br>cohort) | FVC                                              | 1.412                 | 0.923   | 1.521  | 0.958   | 0.963     | 0.755                       |
|                                 | DLCO                                             | 5.386                 | 0.371   | 5.953  | 0.428   | 0.470     | 0.501                       |
|                                 | TFS                                              | 1.251                 | 0.940   | 1.259  | 0.974   | 0.972     | 0.931                       |
|                                 | Susceptibility                                   | 6.877                 | 0.442   | 7.533  | 0.480   | 0.503     | 0.444                       |

Abbreviations: MR: Mendelian randomization; IVW: inverse variance weighted; GERD: gastroesophageal reflux disease; FVC: forced vital capacity; DLco: diffuse lung capacity for carbon monoxide; TFS: transplantation-free survival.

**Table S5 Index instrumental SNPs for exposures and outcomes in the multivariable Mendelian randomization analysis**

| SNPs                                          | GERD                   |                       |                        | Smoking Initiation     |                       |                        | IPF                    |                       |                       |
|-----------------------------------------------|------------------------|-----------------------|------------------------|------------------------|-----------------------|------------------------|------------------------|-----------------------|-----------------------|
|                                               | Beta                   | SE                    | P-value                | Beta                   | SE                    | P-value                | Beta                   | SE                    | P-value               |
| <b>Discovery Cohort (number of SNPs: 105)</b> |                        |                       |                        |                        |                       |                        |                        |                       |                       |
| rs10010963                                    | $2.70 \times 10^{-2}$  | $4.95 \times 10^{-3}$ | $4.92 \times 10^{-8}$  | $-2.45 \times 10^{-3}$ | $3.66 \times 10^{-3}$ | $5.04 \times 10^{-1}$  | $2.02 \times 10^{-2}$  | $2.79 \times 10^{-2}$ | $4.70 \times 10^{-1}$ |
| rs10036561                                    | $-1.65 \times 10^{-2}$ | $5.51 \times 10^{-3}$ | $2.72 \times 10^{-3}$  | $2.35 \times 10^{-2}$  | $4.08 \times 10^{-3}$ | $9.36 \times 10^{-9}$  | $2.75 \times 10^{-2}$  | $3.13 \times 10^{-2}$ | $3.80 \times 10^{-1}$ |
| rs10119773                                    | $-2.69 \times 10^{-2}$ | $4.86 \times 10^{-3}$ | $3.26 \times 10^{-8}$  | $1.19 \times 10^{-2}$  | $3.56 \times 10^{-3}$ | $8.30 \times 10^{-4}$  | $-1.10 \times 10^{-2}$ | $2.71 \times 10^{-2}$ | $6.85 \times 10^{-1}$ |
| rs1013030                                     | $-2.96 \times 10^{-2}$ | $5.33 \times 10^{-3}$ | $2.83 \times 10^{-8}$  | $8.56 \times 10^{-4}$  | $3.97 \times 10^{-3}$ | $8.29 \times 10^{-1}$  | $-6.00 \times 10^{-3}$ | $3.02 \times 10^{-2}$ | $8.43 \times 10^{-1}$ |
| rs10228350                                    | $-2.89 \times 10^{-2}$ | $4.89 \times 10^{-3}$ | $3.48 \times 10^{-9}$  | $9.80 \times 10^{-3}$  | $3.60 \times 10^{-3}$ | $6.53 \times 10^{-3}$  | $2.38 \times 10^{-2}$  | $2.77 \times 10^{-2}$ | $3.91 \times 10^{-1}$ |
| rs10490159                                    | $-8.91 \times 10^{-3}$ | $4.91 \times 10^{-3}$ | $6.95 \times 10^{-2}$  | $2.16 \times 10^{-2}$  | $3.63 \times 10^{-3}$ | $2.59 \times 10^{-9}$  | $-2.31 \times 10^{-2}$ | $2.80 \times 10^{-2}$ | $4.10 \times 10^{-1}$ |
| rs10492861                                    | $-2.98 \times 10^{-2}$ | $5.33 \times 10^{-3}$ | $2.37 \times 10^{-8}$  | $-4.58 \times 10^{-3}$ | $3.91 \times 10^{-3}$ | $2.41 \times 10^{-1}$  | $-2.83 \times 10^{-2}$ | $3.02 \times 10^{-2}$ | $3.49 \times 10^{-1}$ |
| rs1050863                                     | $9.02 \times 10^{-3}$  | $4.88 \times 10^{-3}$ | $6.45 \times 10^{-2}$  | $-2.01 \times 10^{-2}$ | $3.58 \times 10^{-3}$ | $2.15 \times 10^{-8}$  | $-2.54 \times 10^{-2}$ | $2.74 \times 10^{-2}$ | $3.54 \times 10^{-1}$ |
| rs10747488                                    | $4.20 \times 10^{-2}$  | $5.72 \times 10^{-3}$ | $2.27 \times 10^{-13}$ | $-7.91 \times 10^{-5}$ | $4.16 \times 10^{-3}$ | $9.85 \times 10^{-1}$  | $8.81 \times 10^{-2}$  | $3.21 \times 10^{-2}$ | $6.13 \times 10^{-3}$ |
| rs10818398                                    | $-2.71 \times 10^{-2}$ | $4.91 \times 10^{-3}$ | $3.49 \times 10^{-8}$  | $-1.36 \times 10^{-3}$ | $3.63 \times 10^{-3}$ | $7.08 \times 10^{-1}$  | $-1.60 \times 10^{-3}$ | $2.77 \times 10^{-2}$ | $9.54 \times 10^{-1}$ |
| rs10837002                                    | $-2.76 \times 10^{-2}$ | $5.04 \times 10^{-3}$ | $4.03 \times 10^{-8}$  | $5.19 \times 10^{-3}$  | $3.73 \times 10^{-3}$ | $1.64 \times 10^{-1}$  | $5.50 \times 10^{-3}$  | $2.86 \times 10^{-2}$ | $8.47 \times 10^{-1}$ |
| rs11030380                                    | $-1.83 \times 10^{-2}$ | $4.92 \times 10^{-3}$ | $1.98 \times 10^{-4}$  | $2.01 \times 10^{-2}$  | $3.63 \times 10^{-3}$ | $2.97 \times 10^{-8}$  | $-8.20 \times 10^{-3}$ | $2.79 \times 10^{-2}$ | $7.69 \times 10^{-1}$ |
| rs11057005                                    | $1.67 \times 10^{-2}$  | $4.87 \times 10^{-3}$ | $6.11 \times 10^{-4}$  | $-2.09 \times 10^{-2}$ | $3.58 \times 10^{-3}$ | $4.85 \times 10^{-9}$  | $4.63 \times 10^{-2}$  | $2.73 \times 10^{-2}$ | $8.98 \times 10^{-2}$ |
| rs11645288                                    | $-3.39 \times 10^{-2}$ | $6.11 \times 10^{-3}$ | $2.78 \times 10^{-8}$  | $6.08 \times 10^{-3}$  | $4.50 \times 10^{-3}$ | $1.77 \times 10^{-1}$  | $-2.36 \times 10^{-2}$ | $3.38 \times 10^{-2}$ | $4.85 \times 10^{-1}$ |
| rs11716779                                    | $-2.00 \times 10^{-2}$ | $5.42 \times 10^{-3}$ | $2.18 \times 10^{-4}$  | $2.20 \times 10^{-2}$  | $4.03 \times 10^{-3}$ | $4.88 \times 10^{-8}$  | $-3.48 \times 10^{-2}$ | $3.10 \times 10^{-2}$ | $2.61 \times 10^{-1}$ |
| rs11780471                                    | $1.27 \times 10^{-2}$  | $9.91 \times 10^{-3}$ | $2.00 \times 10^{-1}$  | $-5.05 \times 10^{-2}$ | $7.33 \times 10^{-3}$ | $5.69 \times 10^{-12}$ | $1.68 \times 10^{-2}$  | $5.58 \times 10^{-2}$ | $7.63 \times 10^{-1}$ |
| rs11992983                                    | $-3.10 \times 10^{-2}$ | $4.85 \times 10^{-3}$ | $1.64 \times 10^{-10}$ | $1.14 \times 10^{-2}$  | $3.57 \times 10^{-3}$ | $1.44 \times 10^{-3}$  | $-4.17 \times 10^{-2}$ | $2.74 \times 10^{-2}$ | $1.28 \times 10^{-1}$ |
| rs12442894                                    | $-1.09 \times 10^{-2}$ | $5.82 \times 10^{-3}$ | $6.20 \times 10^{-2}$  | $-2.44 \times 10^{-2}$ | $4.29 \times 10^{-3}$ | $1.28 \times 10^{-8}$  | $9.00 \times 10^{-3}$  | $3.30 \times 10^{-2}$ | $7.85 \times 10^{-1}$ |
| rs1261097                                     | $-3.12 \times 10^{-2}$ | $5.26 \times 10^{-3}$ | $2.96 \times 10^{-9}$  | $-5.88 \times 10^{-3}$ | $3.89 \times 10^{-3}$ | $1.31 \times 10^{-1}$  | $5.00 \times 10^{-4}$  | $2.98 \times 10^{-2}$ | $9.87 \times 10^{-1}$ |
| rs12617870                                    | $-2.67 \times 10^{-2}$ | $4.84 \times 10^{-3}$ | $3.67 \times 10^{-8}$  | $8.15 \times 10^{-4}$  | $3.57 \times 10^{-3}$ | $8.19 \times 10^{-1}$  | $-7.10 \times 10^{-3}$ | $2.71 \times 10^{-2}$ | $7.93 \times 10^{-1}$ |
| rs12662100                                    | $3.24 \times 10^{-2}$  | $5.55 \times 10^{-3}$ | $5.22 \times 10^{-9}$  | $-1.50 \times 10^{-3}$ | $4.12 \times 10^{-3}$ | $7.15 \times 10^{-1}$  | $1.07 \times 10^{-2}$  | $3.07 \times 10^{-2}$ | $7.27 \times 10^{-1}$ |

| SNPs       | GERD                   |                       |                        | Smoking Initiation     |                       |                       | IPF                    |                       |                       |
|------------|------------------------|-----------------------|------------------------|------------------------|-----------------------|-----------------------|------------------------|-----------------------|-----------------------|
|            | Beta                   | SE                    | P-value                | Beta                   | SE                    | P-value               | Beta                   | SE                    | P-value               |
| rs12662631 | $-1.17 \times 10^{-2}$ | $5.18 \times 10^{-3}$ | $2.39 \times 10^{-2}$  | $2.10 \times 10^{-2}$  | $3.83 \times 10^{-3}$ | $4.26 \times 10^{-8}$ | $8.54 \times 10^{-2}$  | $2.92 \times 10^{-2}$ | $3.44 \times 10^{-3}$ |
| rs12888955 | $2.85 \times 10^{-2}$  | $5.07 \times 10^{-3}$ | $1.75 \times 10^{-8}$  | $-9.27 \times 10^{-3}$ | $3.74 \times 10^{-3}$ | $1.32 \times 10^{-2}$ | $4.26 \times 10^{-2}$  | $2.83 \times 10^{-2}$ | $1.33 \times 10^{-1}$ |
| rs12939066 | $-3.02 \times 10^{-2}$ | $5.11 \times 10^{-3}$ | $3.13 \times 10^{-9}$  | $1.64 \times 10^{-2}$  | $3.80 \times 10^{-3}$ | $1.59 \times 10^{-5}$ | $-6.49 \times 10^{-2}$ | $2.89 \times 10^{-2}$ | $2.46 \times 10^{-2}$ |
| rs12966968 | $-2.95 \times 10^{-2}$ | $4.90 \times 10^{-3}$ | $1.62 \times 10^{-9}$  | $7.74 \times 10^{-3}$  | $3.61 \times 10^{-3}$ | $3.22 \times 10^{-2}$ | $1.43 \times 10^{-2}$  | $2.74 \times 10^{-2}$ | $6.02 \times 10^{-1}$ |
| rs12985909 | $3.05 \times 10^{-2}$  | $4.84 \times 10^{-3}$ | $2.81 \times 10^{-10}$ | $-1.13 \times 10^{-2}$ | $3.58 \times 10^{-3}$ | $1.57 \times 10^{-3}$ | $4.50 \times 10^{-3}$  | $2.73 \times 10^{-2}$ | $8.69 \times 10^{-1}$ |
| rs12997558 | $-2.78 \times 10^{-2}$ | $5.02 \times 10^{-3}$ | $3.04 \times 10^{-8}$  | $2.38 \times 10^{-3}$  | $3.70 \times 10^{-3}$ | $5.20 \times 10^{-1}$ | $1.39 \times 10^{-2}$  | $2.81 \times 10^{-2}$ | $6.21 \times 10^{-1}$ |
| rs13019618 | $3.09 \times 10^{-2}$  | $5.67 \times 10^{-3}$ | $4.86 \times 10^{-8}$  | $4.64 \times 10^{-3}$  | $4.21 \times 10^{-3}$ | $2.70 \times 10^{-1}$ | $7.59 \times 10^{-2}$  | $3.18 \times 10^{-2}$ | $1.71 \times 10^{-2}$ |
| rs13227117 | $2.67 \times 10^{-2}$  | $4.89 \times 10^{-3}$ | $4.86 \times 10^{-8}$  | $-8.97 \times 10^{-3}$ | $3.59 \times 10^{-3}$ | $1.25 \times 10^{-2}$ | $1.00 \times 10^{-3}$  | $2.75 \times 10^{-2}$ | $9.71 \times 10^{-1}$ |
| rs13409451 | $2.77 \times 10^{-2}$  | $4.93 \times 10^{-3}$ | $1.93 \times 10^{-8}$  | $-5.55 \times 10^{-3}$ | $3.65 \times 10^{-3}$ | $1.28 \times 10^{-1}$ | $2.17 \times 10^{-2}$  | $3.04 \times 10^{-2}$ | $4.75 \times 10^{-1}$ |
| rs1343424  | $-1.98 \times 10^{-2}$ | $5.54 \times 10^{-3}$ | $3.49 \times 10^{-4}$  | $2.28 \times 10^{-2}$  | $4.17 \times 10^{-3}$ | $4.67 \times 10^{-8}$ | $2.04 \times 10^{-2}$  | $3.17 \times 10^{-2}$ | $5.20 \times 10^{-1}$ |
| rs134529   | $4.70 \times 10^{-3}$  | $4.95 \times 10^{-3}$ | $3.42 \times 10^{-1}$  | $-2.00 \times 10^{-2}$ | $3.66 \times 10^{-3}$ | $4.85 \times 10^{-8}$ | $4.92 \times 10^{-2}$  | $2.81 \times 10^{-2}$ | $8.04 \times 10^{-2}$ |
| rs1346622  | $2.89 \times 10^{-2}$  | $4.88 \times 10^{-3}$ | $2.94 \times 10^{-9}$  | $3.30 \times 10^{-3}$  | $3.77 \times 10^{-3}$ | $3.82 \times 10^{-1}$ | $1.19 \times 10^{-2}$  | $2.74 \times 10^{-2}$ | $6.64 \times 10^{-1}$ |
| rs1427499  | $5.51 \times 10^{-3}$  | $5.31 \times 10^{-3}$ | $2.99 \times 10^{-1}$  | $-2.24 \times 10^{-2}$ | $3.92 \times 10^{-3}$ | $1.08 \times 10^{-8}$ | $5.16 \times 10^{-2}$  | $3.01 \times 10^{-2}$ | $8.69 \times 10^{-2}$ |
| rs1436351  | $-3.05 \times 10^{-2}$ | $5.52 \times 10^{-3}$ | $3.14 \times 10^{-8}$  | $3.51 \times 10^{-3}$  | $4.11 \times 10^{-3}$ | $3.93 \times 10^{-1}$ | $-4.50 \times 10^{-2}$ | $3.12 \times 10^{-2}$ | $1.49 \times 10^{-1}$ |
| rs1466802  | $-1.39 \times 10^{-2}$ | $5.77 \times 10^{-3}$ | $1.60 \times 10^{-2}$  | $2.35 \times 10^{-2}$  | $4.21 \times 10^{-3}$ | $2.21 \times 10^{-8}$ | $3.45 \times 10^{-2}$  | $3.24 \times 10^{-2}$ | $2.86 \times 10^{-1}$ |
| rs1486465  | $-1.31 \times 10^{-2}$ | $5.57 \times 10^{-3}$ | $1.86 \times 10^{-2}$  | $2.25 \times 10^{-2}$  | $4.10 \times 10^{-3}$ | $3.94 \times 10^{-8}$ | $-2.10 \times 10^{-3}$ | $3.12 \times 10^{-2}$ | $9.46 \times 10^{-1}$ |
| rs1570059  | $-3.33 \times 10^{-2}$ | $4.82 \times 10^{-3}$ | $4.79 \times 10^{-12}$ | $1.25 \times 10^{-2}$  | $3.57 \times 10^{-3}$ | $4.56 \times 10^{-4}$ | $4.46 \times 10^{-2}$  | $2.73 \times 10^{-2}$ | $1.02 \times 10^{-1}$ |
| rs17613129 | $-9.92 \times 10^{-3}$ | $5.25 \times 10^{-3}$ | $5.89 \times 10^{-2}$  | $2.19 \times 10^{-2}$  | $3.90 \times 10^{-3}$ | $1.89 \times 10^{-8}$ | $2.50 \times 10^{-3}$  | $2.96 \times 10^{-2}$ | $9.33 \times 10^{-1}$ |
| rs17701934 | $2.65 \times 10^{-2}$  | $4.85 \times 10^{-3}$ | $4.60 \times 10^{-8}$  | $2.22 \times 10^{-3}$  | $3.60 \times 10^{-3}$ | $5.38 \times 10^{-1}$ | $-8.00 \times 10^{-4}$ | $2.75 \times 10^{-2}$ | $9.77 \times 10^{-1}$ |
| rs17822102 | $2.95 \times 10^{-2}$  | $5.06 \times 10^{-3}$ | $5.24 \times 10^{-9}$  | $-8.26 \times 10^{-3}$ | $3.74 \times 10^{-3}$ | $2.74 \times 10^{-2}$ | $-3.50 \times 10^{-3}$ | $2.88 \times 10^{-2}$ | $9.03 \times 10^{-1}$ |
| rs1860224  | $2.94 \times 10^{-2}$  | $5.35 \times 10^{-3}$ | $3.70 \times 10^{-8}$  | $-6.15 \times 10^{-3}$ | $3.92 \times 10^{-3}$ | $1.16 \times 10^{-1}$ | $-6.80 \times 10^{-3}$ | $3.01 \times 10^{-2}$ | $8.22 \times 10^{-1}$ |
| rs199752   | $3.04 \times 10^{-2}$  | $5.31 \times 10^{-3}$ | $1.01 \times 10^{-8}$  | $-7.80 \times 10^{-3}$ | $3.90 \times 10^{-3}$ | $4.58 \times 10^{-2}$ | $2.08 \times 10^{-2}$  | $2.95 \times 10^{-2}$ | $4.81 \times 10^{-1}$ |

| SNPs      | GERD                   |                       |                        | Smoking Initiation     |                       |                        | IPF                    |                       |                       |
|-----------|------------------------|-----------------------|------------------------|------------------------|-----------------------|------------------------|------------------------|-----------------------|-----------------------|
|           | Beta                   | SE                    | P-value                | Beta                   | SE                    | P-value                | Beta                   | SE                    | P-value               |
| rs2046850 | $1.29 \times 10^{-2}$  | $6.08 \times 10^{-3}$ | $3.41 \times 10^{-2}$  | $-2.48 \times 10^{-2}$ | $4.48 \times 10^{-3}$ | $3.03 \times 10^{-8}$  | $3.62 \times 10^{-2}$  | $3.49 \times 10^{-2}$ | $2.99 \times 10^{-1}$ |
| rs205319  | $-2.75 \times 10^{-2}$ | $4.87 \times 10^{-3}$ | $1.73 \times 10^{-8}$  | $8.65 \times 10^{-3}$  | $3.60 \times 10^{-3}$ | $1.63 \times 10^{-2}$  | $5.88 \times 10^{-2}$  | $3.00 \times 10^{-2}$ | $5.03 \times 10^{-2}$ |
| rs2069408 | $3.03 \times 10^{-2}$  | $5.08 \times 10^{-3}$ | $2.28 \times 10^{-9}$  | $-1.01 \times 10^{-2}$ | $3.78 \times 10^{-3}$ | $7.26 \times 10^{-3}$  | $6.10 \times 10^{-3}$  | $2.88 \times 10^{-2}$ | $8.32 \times 10^{-1}$ |
| rs2107300 | $2.71 \times 10^{-2}$  | $6.63 \times 10^{-3}$ | $4.45 \times 10^{-5}$  | $-2.72 \times 10^{-2}$ | $4.93 \times 10^{-3}$ | $3.27 \times 10^{-8}$  | $-1.10 \times 10^{-2}$ | $3.75 \times 10^{-2}$ | $7.69 \times 10^{-1}$ |
| rs2111705 | $-2.77 \times 10^{-2}$ | $4.83 \times 10^{-3}$ | $9.02 \times 10^{-9}$  | $4.70 \times 10^{-3}$  | $3.57 \times 10^{-3}$ | $1.88 \times 10^{-1}$  | $-3.17 \times 10^{-2}$ | $2.72 \times 10^{-2}$ | $2.44 \times 10^{-1}$ |
| rs2240294 | $1.11 \times 10^{-2}$  | $4.85 \times 10^{-3}$ | $2.18 \times 10^{-2}$  | $-2.09 \times 10^{-2}$ | $3.57 \times 10^{-3}$ | $4.82 \times 10^{-9}$  | $-4.00 \times 10^{-3}$ | $2.98 \times 10^{-2}$ | $8.93 \times 10^{-1}$ |
| rs2281767 | $-2.66 \times 10^{-2}$ | $4.83 \times 10^{-3}$ | $3.81 \times 10^{-8}$  | $2.71 \times 10^{-3}$  | $3.56 \times 10^{-3}$ | $4.45 \times 10^{-1}$  | $1.03 \times 10^{-2}$  | $2.72 \times 10^{-2}$ | $7.05 \times 10^{-1}$ |
| rs2285086 | $2.67 \times 10^{-2}$  | $4.89 \times 10^{-3}$ | $4.86 \times 10^{-8}$  | $-8.95 \times 10^{-4}$ | $3.59 \times 10^{-3}$ | $8.03 \times 10^{-1}$  | $4.07 \times 10^{-2}$  | $2.75 \times 10^{-2}$ | $1.39 \times 10^{-1}$ |
| rs2397135 | $-5.65 \times 10^{-3}$ | $5.47 \times 10^{-3}$ | $3.01 \times 10^{-1}$  | $2.24 \times 10^{-2}$  | $4.02 \times 10^{-3}$ | $2.63 \times 10^{-8}$  | $-2.65 \times 10^{-2}$ | $3.07 \times 10^{-2}$ | $3.88 \times 10^{-1}$ |
| rs2652447 | $7.39 \times 10^{-4}$  | $4.90 \times 10^{-3}$ | $8.80 \times 10^{-1}$  | $2.01 \times 10^{-2}$  | $3.60 \times 10^{-3}$ | $2.46 \times 10^{-8}$  | $5.70 \times 10^{-2}$  | $2.76 \times 10^{-2}$ | $3.90 \times 10^{-2}$ |
| rs2678908 | $-2.22 \times 10^{-3}$ | $4.91 \times 10^{-3}$ | $6.50 \times 10^{-1}$  | $1.99 \times 10^{-2}$  | $3.64 \times 10^{-3}$ | $4.48 \times 10^{-8}$  | $-3.61 \times 10^{-2}$ | $2.77 \times 10^{-2}$ | $1.93 \times 10^{-1}$ |
| rs2867105 | $-2.91 \times 10^{-2}$ | $6.32 \times 10^{-3}$ | $4.10 \times 10^{-6}$  | $3.17 \times 10^{-2}$  | $4.65 \times 10^{-3}$ | $9.21 \times 10^{-12}$ | $9.80 \times 10^{-2}$  | $3.57 \times 10^{-2}$ | $6.09 \times 10^{-3}$ |
| rs324769  | $2.68 \times 10^{-2}$  | $4.83 \times 10^{-3}$ | $3.05 \times 10^{-8}$  | $-1.44 \times 10^{-2}$ | $3.57 \times 10^{-3}$ | $5.09 \times 10^{-5}$  | $-1.20 \times 10^{-3}$ | $2.75 \times 10^{-2}$ | $9.65 \times 10^{-1}$ |
| rs357512  | $1.04 \times 10^{-2}$  | $5.54 \times 10^{-3}$ | $6.03 \times 10^{-2}$  | $2.23 \times 10^{-2}$  | $4.07 \times 10^{-3}$ | $4.07 \times 10^{-8}$  | $-3.88 \times 10^{-2}$ | $3.11 \times 10^{-2}$ | $2.12 \times 10^{-1}$ |
| rs3766823 | $-3.94 \times 10^{-2}$ | $6.39 \times 10^{-3}$ | $7.09 \times 10^{-10}$ | $2.14 \times 10^{-2}$  | $4.70 \times 10^{-3}$ | $5.22 \times 10^{-6}$  | $2.82 \times 10^{-2}$  | $3.63 \times 10^{-2}$ | $4.37 \times 10^{-1}$ |
| rs3795310 | $-9.69 \times 10^{-3}$ | $4.83 \times 10^{-3}$ | $4.50 \times 10^{-2}$  | $-2.03 \times 10^{-2}$ | $3.58 \times 10^{-3}$ | $1.45 \times 10^{-8}$  | $-2.80 \times 10^{-3}$ | $2.73 \times 10^{-2}$ | $9.18 \times 10^{-1}$ |
| rs3800227 | $-8.40 \times 10^{-3}$ | $5.52 \times 10^{-3}$ | $1.28 \times 10^{-1}$  | $2.28 \times 10^{-2}$  | $4.06 \times 10^{-3}$ | $1.93 \times 10^{-8}$  | $6.18 \times 10^{-2}$  | $3.09 \times 10^{-2}$ | $4.54 \times 10^{-2}$ |
| rs3828917 | $-6.71 \times 10^{-2}$ | $1.20 \times 10^{-2}$ | $2.27 \times 10^{-8}$  | $3.82 \times 10^{-3}$  | $9.70 \times 10^{-3}$ | $6.93 \times 10^{-1}$  | $4.60 \times 10^{-2}$  | $7.70 \times 10^{-2}$ | $5.50 \times 10^{-1}$ |
| rs3857914 | $-8.59 \times 10^{-3}$ | $5.26 \times 10^{-3}$ | $1.02 \times 10^{-1}$  | $2.54 \times 10^{-2}$  | $3.86 \times 10^{-3}$ | $4.46 \times 10^{-11}$ | $-1.54 \times 10^{-2}$ | $2.93 \times 10^{-2}$ | $5.99 \times 10^{-1}$ |
| rs3897990 | $-1.73 \times 10^{-2}$ | $5.59 \times 10^{-3}$ | $1.98 \times 10^{-3}$  | $2.33 \times 10^{-2}$  | $4.19 \times 10^{-3}$ | $2.60 \times 10^{-8}$  | $4.42 \times 10^{-2}$  | $3.15 \times 10^{-2}$ | $1.61 \times 10^{-1}$ |
| rs4634524 | $3.48 \times 10^{-2}$  | $5.87 \times 10^{-3}$ | $2.92 \times 10^{-9}$  | $-1.58 \times 10^{-2}$ | $4.36 \times 10^{-3}$ | $2.81 \times 10^{-4}$  | $6.90 \times 10^{-3}$  | $3.27 \times 10^{-2}$ | $8.33 \times 10^{-1}$ |
| rs4713692 | $2.76 \times 10^{-2}$  | $4.99 \times 10^{-3}$ | $3.07 \times 10^{-8}$  | $1.56 \times 10^{-3}$  | $3.71 \times 10^{-3}$ | $6.73 \times 10^{-1}$  | $-2.94 \times 10^{-2}$ | $2.83 \times 10^{-2}$ | $3.00 \times 10^{-1}$ |



| SNPs      | GERD                   |                       |                        | Smoking Initiation     |                       |                        | IPF                    |                       |                       |
|-----------|------------------------|-----------------------|------------------------|------------------------|-----------------------|------------------------|------------------------|-----------------------|-----------------------|
|           | Beta                   | SE                    | P-value                | Beta                   | SE                    | P-value                | Beta                   | SE                    | P-value               |
| rs4731315 | $3.20 \times 10^{-2}$  | $5.73 \times 10^{-3}$ | $2.39 \times 10^{-8}$  | $-9.29 \times 10^{-3}$ | $4.26 \times 10^{-3}$ | $2.93 \times 10^{-2}$  | $6.01 \times 10^{-2}$  | $3.28 \times 10^{-2}$ | $6.67 \times 10^{-2}$ |
| rs4781977 | $3.84 \times 10^{-3}$  | $5.79 \times 10^{-3}$ | $5.07 \times 10^{-1}$  | $-2.39 \times 10^{-2}$ | $4.36 \times 10^{-3}$ | $4.54 \times 10^{-8}$  | $-2.69 \times 10^{-2}$ | $3.32 \times 10^{-2}$ | $4.18 \times 10^{-1}$ |
| rs4869748 | $2.88 \times 10^{-2}$  | $5.00 \times 10^{-3}$ | $8.79 \times 10^{-9}$  | $-8.17 \times 10^{-3}$ | $3.70 \times 10^{-3}$ | $2.75 \times 10^{-2}$  | $1.70 \times 10^{-3}$  | $2.83 \times 10^{-2}$ | $9.52 \times 10^{-1}$ |
| rs569356  | $3.79 \times 10^{-2}$  | $6.91 \times 10^{-3}$ | $4.07 \times 10^{-8}$  | $4.44 \times 10^{-3}$  | $5.20 \times 10^{-3}$ | $3.93 \times 10^{-1}$  | $-3.39 \times 10^{-2}$ | $3.90 \times 10^{-2}$ | $3.85 \times 10^{-1}$ |
| rs6050446 | $-4.86 \times 10^{-2}$ | $1.35 \times 10^{-2}$ | $3.21 \times 10^{-4}$  | $5.83 \times 10^{-2}$  | $1.03 \times 10^{-2}$ | $1.56 \times 10^{-8}$  | $6.96 \times 10^{-2}$  | $8.05 \times 10^{-2}$ | $3.87 \times 10^{-1}$ |
| rs6415872 | $3.58 \times 10^{-3}$  | $4.82 \times 10^{-3}$ | $4.58 \times 10^{-1}$  | $-2.37 \times 10^{-2}$ | $3.56 \times 10^{-3}$ | $2.49 \times 10^{-11}$ | $-1.81 \times 10^{-2}$ | $2.71 \times 10^{-2}$ | $5.04 \times 10^{-1}$ |
| rs6476180 | $-7.33 \times 10^{-3}$ | $4.81 \times 10^{-3}$ | $1.28 \times 10^{-1}$  | $1.97 \times 10^{-2}$  | $3.56 \times 10^{-3}$ | $2.95 \times 10^{-8}$  | $-1.78 \times 10^{-2}$ | $2.72 \times 10^{-2}$ | $5.13 \times 10^{-1}$ |
| rs6597540 | $2.83 \times 10^{-2}$  | $5.16 \times 10^{-3}$ | $4.04 \times 10^{-8}$  | $-1.85 \times 10^{-2}$ | $3.81 \times 10^{-3}$ | $1.21 \times 10^{-6}$  | $2.29 \times 10^{-2}$  | $2.90 \times 10^{-2}$ | $4.29 \times 10^{-1}$ |
| rs6656687 | $-7.82 \times 10^{-3}$ | $4.83 \times 10^{-3}$ | $1.05 \times 10^{-1}$  | $1.99 \times 10^{-2}$  | $3.56 \times 10^{-3}$ | $2.36 \times 10^{-8}$  | $-3.00 \times 10^{-2}$ | $2.72 \times 10^{-2}$ | $2.70 \times 10^{-1}$ |
| rs6717424 | $-5.82 \times 10^{-3}$ | $4.85 \times 10^{-3}$ | $2.30 \times 10^{-1}$  | $2.74 \times 10^{-2}$  | $3.60 \times 10^{-3}$ | $2.63 \times 10^{-14}$ | $3.62 \times 10^{-2}$  | $2.76 \times 10^{-2}$ | $1.90 \times 10^{-1}$ |
| rs6748263 | $-2.63 \times 10^{-2}$ | $4.83 \times 10^{-3}$ | $4.95 \times 10^{-8}$  | $1.36 \times 10^{-2}$  | $3.56 \times 10^{-3}$ | $1.40 \times 10^{-4}$  | $-4.88 \times 10^{-2}$ | $2.96 \times 10^{-2}$ | $9.94 \times 10^{-2}$ |
| rs6750529 | $-1.35 \times 10^{-2}$ | $5.46 \times 10^{-3}$ | $1.36 \times 10^{-2}$  | $2.24 \times 10^{-2}$  | $4.06 \times 10^{-3}$ | $3.54 \times 10^{-8}$  | $-1.05 \times 10^{-2}$ | $3.12 \times 10^{-2}$ | $7.36 \times 10^{-1}$ |
| rs715693  | $-1.41 \times 10^{-2}$ | $4.97 \times 10^{-3}$ | $4.68 \times 10^{-3}$  | $2.00 \times 10^{-2}$  | $3.65 \times 10^{-3}$ | $4.44 \times 10^{-8}$  | $-1.47 \times 10^{-2}$ | $2.79 \times 10^{-2}$ | $5.99 \times 10^{-1}$ |
| rs7238242 | $1.12 \times 10^{-3}$  | $4.86 \times 10^{-3}$ | $8.18 \times 10^{-1}$  | $-2.04 \times 10^{-2}$ | $3.59 \times 10^{-3}$ | $1.27 \times 10^{-8}$  | $-3.75 \times 10^{-2}$ | $2.73 \times 10^{-2}$ | $1.69 \times 10^{-1}$ |
| rs7258722 | $2.77 \times 10^{-2}$  | $4.92 \times 10^{-3}$ | $1.81 \times 10^{-8}$  | $8.44 \times 10^{-4}$  | $3.63 \times 10^{-3}$ | $8.16 \times 10^{-1}$  | $5.50 \times 10^{-3}$  | $2.77 \times 10^{-2}$ | $8.43 \times 10^{-1}$ |
| rs7283473 | $-2.94 \times 10^{-2}$ | $5.18 \times 10^{-3}$ | $1.44 \times 10^{-8}$  | $-5.44 \times 10^{-3}$ | $3.86 \times 10^{-3}$ | $1.59 \times 10^{-1}$  | $4.00 \times 10^{-3}$  | $2.95 \times 10^{-2}$ | $8.92 \times 10^{-1}$ |
| rs7303854 | $-3.02 \times 10^{-2}$ | $5.15 \times 10^{-3}$ | $4.41 \times 10^{-9}$  | $3.22 \times 10^{-3}$  | $3.78 \times 10^{-3}$ | $3.94 \times 10^{-1}$  | $-5.25 \times 10^{-2}$ | $2.89 \times 10^{-2}$ | $6.91 \times 10^{-2}$ |
| rs7319102 | $3.89 \times 10^{-2}$  | $5.75 \times 10^{-3}$ | $1.33 \times 10^{-11}$ | $-7.78 \times 10^{-3}$ | $4.24 \times 10^{-3}$ | $6.65 \times 10^{-2}$  | $6.80 \times 10^{-3}$  | $3.55 \times 10^{-2}$ | $8.48 \times 10^{-1}$ |
| rs7357604 | $-2.88 \times 10^{-2}$ | $4.92 \times 10^{-3}$ | $4.57 \times 10^{-9}$  | $-6.52 \times 10^{-3}$ | $3.63 \times 10^{-3}$ | $7.28 \times 10^{-2}$  | $3.90 \times 10^{-3}$  | $2.78 \times 10^{-2}$ | $8.89 \times 10^{-1}$ |
| rs7556896 | $-3.33 \times 10^{-2}$ | $5.18 \times 10^{-3}$ | $1.27 \times 10^{-10}$ | $6.28 \times 10^{-3}$  | $3.84 \times 10^{-3}$ | $1.02 \times 10^{-1}$  | $2.39 \times 10^{-2}$  | $2.95 \times 10^{-2}$ | $4.18 \times 10^{-1}$ |
| rs7612999 | $-3.05 \times 10^{-2}$ | $5.60 \times 10^{-3}$ | $4.90 \times 10^{-8}$  | $4.27 \times 10^{-3}$  | $4.11 \times 10^{-3}$ | $2.99 \times 10^{-1}$  | $-2.27 \times 10^{-2}$ | $3.13 \times 10^{-2}$ | $4.68 \times 10^{-1}$ |
| rs761777  | $-3.45 \times 10^{-2}$ | $5.54 \times 10^{-3}$ | $4.71 \times 10^{-10}$ | $1.05 \times 10^{-2}$  | $4.12 \times 10^{-3}$ | $1.11 \times 10^{-2}$  | $8.30 \times 10^{-3}$  | $3.09 \times 10^{-2}$ | $7.88 \times 10^{-1}$ |

| SNPs                                            | GERD                   |                       |                       | Smoking Initiation     |                       |                        | IPF                    |                       |                       |
|-------------------------------------------------|------------------------|-----------------------|-----------------------|------------------------|-----------------------|------------------------|------------------------|-----------------------|-----------------------|
|                                                 | Beta                   | SE                    | P-value               | Beta                   | SE                    | P-value                | Beta                   | SE                    | P-value               |
| rs7628120                                       | $3.04 \times 10^{-2}$  | $5.37 \times 10^{-3}$ | $1.53 \times 10^{-8}$ | $3.00 \times 10^{-3}$  | $3.93 \times 10^{-3}$ | $4.45 \times 10^{-1}$  | $4.62 \times 10^{-2}$  | $2.97 \times 10^{-2}$ | $1.20 \times 10^{-1}$ |
| rs7659565                                       | $-3.27 \times 10^{-2}$ | $5.96 \times 10^{-3}$ | $4.30 \times 10^{-8}$ | $4.92 \times 10^{-3}$  | $4.40 \times 10^{-3}$ | $2.64 \times 10^{-1}$  | $-2.50 \times 10^{-2}$ | $3.32 \times 10^{-2}$ | $4.51 \times 10^{-1}$ |
| rs7701346                                       | $2.72 \times 10^{-2}$  | $4.89 \times 10^{-3}$ | $2.74 \times 10^{-8}$ | $-5.80 \times 10^{-3}$ | $3.60 \times 10^{-3}$ | $1.07 \times 10^{-1}$  | $-1.00 \times 10^{-4}$ | $2.74 \times 10^{-2}$ | $9.97 \times 10^{-1}$ |
| rs772030                                        | $1.95 \times 10^{-2}$  | $4.93 \times 10^{-3}$ | $7.81 \times 10^{-5}$ | $-2.15 \times 10^{-2}$ | $3.62 \times 10^{-3}$ | $3.03 \times 10^{-9}$  | $-1.80 \times 10^{-2}$ | $2.78 \times 10^{-2}$ | $5.18 \times 10^{-1}$ |
| rs7844990                                       | $4.44 \times 10^{-3}$  | $4.92 \times 10^{-3}$ | $3.67 \times 10^{-1}$ | $2.01 \times 10^{-2}$  | $3.63 \times 10^{-3}$ | $3.23 \times 10^{-8}$  | $3.85 \times 10^{-2}$  | $2.76 \times 10^{-2}$ | $1.63 \times 10^{-1}$ |
| rs7901883                                       | $6.96 \times 10^{-3}$  | $5.73 \times 10^{-3}$ | $2.25 \times 10^{-1}$ | $-2.45 \times 10^{-2}$ | $4.25 \times 10^{-3}$ | $7.98 \times 10^{-9}$  | $2.16 \times 10^{-2}$  | $3.21 \times 10^{-2}$ | $5.02 \times 10^{-1}$ |
| rs7942368                                       | $3.40 \times 10^{-2}$  | $5.92 \times 10^{-3}$ | $9.54 \times 10^{-9}$ | $-7.26 \times 10^{-3}$ | $4.31 \times 10^{-3}$ | $9.17 \times 10^{-2}$  | $-1.97 \times 10^{-2}$ | $3.28 \times 10^{-2}$ | $5.48 \times 10^{-1}$ |
| rs808719                                        | $-2.78 \times 10^{-2}$ | $4.82 \times 10^{-3}$ | $8.48 \times 10^{-9}$ | $1.52 \times 10^{-2}$  | $3.56 \times 10^{-3}$ | $1.92 \times 10^{-5}$  | $-1.48 \times 10^{-2}$ | $2.71 \times 10^{-2}$ | $5.85 \times 10^{-1}$ |
| rs861575                                        | $-2.76 \times 10^{-2}$ | $4.89 \times 10^{-3}$ | $1.63 \times 10^{-8}$ | $4.70 \times 10^{-3}$  | $3.60 \times 10^{-3}$ | $1.91 \times 10^{-1}$  | $2.91 \times 10^{-2}$  | $2.75 \times 10^{-2}$ | $2.90 \times 10^{-1}$ |
| rs903678                                        | $-2.77 \times 10^{-2}$ | $5.08 \times 10^{-3}$ | $4.89 \times 10^{-8}$ | $7.06 \times 10^{-3}$  | $3.76 \times 10^{-3}$ | $6.05 \times 10^{-2}$  | $-9.70 \times 10^{-2}$ | $2.89 \times 10^{-2}$ | $7.37 \times 10^{-1}$ |
| rs917154                                        | $2.56 \times 10^{-2}$  | $6.66 \times 10^{-3}$ | $1.24 \times 10^{-4}$ | $-2.91 \times 10^{-2}$ | $4.90 \times 10^{-3}$ | $2.77 \times 10^{-9}$  | $3.35 \times 10^{-2}$  | $3.72 \times 10^{-2}$ | $3.68 \times 10^{-1}$ |
| rs9322173                                       | $1.90 \times 10^{-2}$  | $4.81 \times 10^{-3}$ | $8.26 \times 10^{-5}$ | $-1.96 \times 10^{-2}$ | $3.56 \times 10^{-3}$ | $3.74 \times 10^{-8}$  | $2.66 \times 10^{-2}$  | $2.94 \times 10^{-2}$ | $3.66 \times 10^{-1}$ |
| rs9373363                                       | $3.27 \times 10^{-2}$  | $5.56 \times 10^{-3}$ | $4.13 \times 10^{-9}$ | $-1.40 \times 10^{-2}$ | $4.07 \times 10^{-3}$ | $5.95 \times 10^{-4}$  | $4.43 \times 10^{-2}$  | $3.16 \times 10^{-2}$ | $1.61 \times 10^{-1}$ |
| rs948536                                        | $-3.29 \times 10^{-2}$ | $5.76 \times 10^{-3}$ | $1.12 \times 10^{-8}$ | $5.32 \times 10^{-3}$  | $4.24 \times 10^{-3}$ | $2.10 \times 10^{-1}$  | $8.12 \times 10^{-2}$  | $3.20 \times 10^{-2}$ | $1.13 \times 10^{-1}$ |
| rs9529119                                       | $-3.22 \times 10^{-2}$ | $5.79 \times 10^{-3}$ | $2.61 \times 10^{-8}$ | $4.59 \times 10^{-3}$  | $4.26 \times 10^{-3}$ | $2.81 \times 10^{-1}$  | $5.26 \times 10^{-2}$  | $3.28 \times 10^{-2}$ | $1.09 \times 10^{-1}$ |
| rs9540718                                       | $-2.67 \times 10^{-2}$ | $4.82 \times 10^{-3}$ | $3.04 \times 10^{-8}$ | $1.86 \times 10^{-2}$  | $3.56 \times 10^{-3}$ | $1.64 \times 10^{-7}$  | $1.49 \times 10^{-2}$  | $2.72 \times 10^{-2}$ | $5.84 \times 10^{-1}$ |
| rs9615905                                       | $-2.76 \times 10^{-2}$ | $4.84 \times 10^{-3}$ | $1.21 \times 10^{-8}$ | $6.04 \times 10^{-3}$  | $3.58 \times 10^{-3}$ | $9.13 \times 10^{-2}$  | $7.60 \times 10^{-3}$  | $2.72 \times 10^{-2}$ | $7.80 \times 10^{-1}$ |
| rs9930501                                       | $-2.93 \times 10^{-2}$ | $4.85 \times 10^{-3}$ | $1.41 \times 10^{-9}$ | $4.75 \times 10^{-3}$  | $3.58 \times 10^{-3}$ | $1.84 \times 10^{-1}$  | $-2.46 \times 10^{-2}$ | $2.73 \times 10^{-2}$ | $3.67 \times 10^{-1}$ |
| <b>Replication Cohort (number of SNPs: 195)</b> |                        |                       |                       |                        |                       |                        |                        |                       |                       |
| rs10036561                                      | $1.38 \times 10^{-2}$  | $1.00 \times 10^{-2}$ | $1.67 \times 10^{-1}$ | $2.35 \times 10^{-2}$  | $4.08 \times 10^{-3}$ | $9.36 \times 10^{-9}$  | $-2.40 \times 10^{-2}$ | $3.45 \times 10^{-2}$ | $4.87 \times 10^{-1}$ |
| rs10075489                                      | $1.41 \times 10^{-2}$  | $9.82 \times 10^{-3}$ | $1.51 \times 10^{-1}$ | $1.88 \times 10^{-2}$  | $3.80 \times 10^{-3}$ | $8.19 \times 10^{-7}$  | $1.74 \times 10^{-2}$  | $3.39 \times 10^{-2}$ | $6.09 \times 10^{-1}$ |
| rs1008078                                       | $-7.42 \times 10^{-3}$ | $9.29 \times 10^{-2}$ | $4.25 \times 10^{-1}$ | $2.22 \times 10^{-2}$  | $3.63 \times 10^{-3}$ | $8.61 \times 10^{-10}$ | $1.35 \times 10^{-2}$  | $3.21 \times 10^{-2}$ | $6.74 \times 10^{-1}$ |

| SNPs        | GERD                   |                       |                       | Smoking Initiation     |                       |                        | IPF                    |                       |                       |
|-------------|------------------------|-----------------------|-----------------------|------------------------|-----------------------|------------------------|------------------------|-----------------------|-----------------------|
|             | Beta                   | SE                    | <i>P</i> -value       | Beta                   | SE                    | <i>P</i> -value        | Beta                   | SE                    | <i>P</i> -value       |
| rs10105293  | $-1.41 \times 10^{-2}$ | $9.23 \times 10^{-3}$ | $1.27 \times 10^{-1}$ | $-2.47 \times 10^{-2}$ | $3.64 \times 10^{-3}$ | $1.09 \times 10^{-11}$ | $-6.42 \times 10^{-2}$ | $3.19 \times 10^{-2}$ | $4.42 \times 10^{-2}$ |
| rs10201987  | $5.81 \times 10^{-3}$  | $9.19 \times 10^{-3}$ | $5.28 \times 10^{-1}$ | $1.83 \times 10^{-2}$  | $3.75 \times 10^{-3}$ | $9.72 \times 10^{-7}$  | $-2.90 \times 10^{-2}$ | $3.19 \times 10^{-2}$ | $3.63 \times 10^{-1}$ |
| rs10249981  | $-2.88 \times 10^{-2}$ | $1.00 \times 10^{-2}$ | $4.13 \times 10^{-3}$ | $-1.81 \times 10^{-2}$ | $3.70 \times 10^{-3}$ | $9.68 \times 10^{-7}$  | $-3.20 \times 10^{-3}$ | $3.50 \times 10^{-2}$ | $9.27 \times 10^{-1}$ |
| rs10490159  | $1.13 \times 10^{-2}$  | $9.52 \times 10^{-3}$ | $2.35 \times 10^{-1}$ | $2.16 \times 10^{-2}$  | $3.63 \times 10^{-3}$ | $2.59 \times 10^{-9}$  | $-1.38 \times 10^{-2}$ | $3.30 \times 10^{-2}$ | $6.76 \times 10^{-1}$ |
| rs10498846  | $1.13 \times 10^{-2}$  | $9.21 \times 10^{-3}$ | $2.18 \times 10^{-1}$ | $2.06 \times 10^{-2}$  | $3.56 \times 10^{-3}$ | $6.62 \times 10^{-9}$  | $1.04 \times 10^{-2}$  | $3.19 \times 10^{-2}$ | $7.45 \times 10^{-1}$ |
| rs10830924  | $-2.44 \times 10^{-3}$ | $9.29 \times 10^{-3}$ | $7.93 \times 10^{-1}$ | $1.81 \times 10^{-2}$  | $3.58 \times 10^{-3}$ | $4.17 \times 10^{-7}$  | $4.55 \times 10^{-2}$  | $3.22 \times 10^{-2}$ | $1.57 \times 10^{-1}$ |
| rs10907322  | $-7.55 \times 10^{-3}$ | $9.21 \times 10^{-3}$ | $4.13 \times 10^{-1}$ | $-1.76 \times 10^{-2}$ | $3.56 \times 10^{-3}$ | $7.52 \times 10^{-7}$  | $5.94 \times 10^{-3}$  | $3.19 \times 10^{-2}$ | $8.52 \times 10^{-1}$ |
| rs10953957  | $2.04 \times 10^{-2}$  | $9.38 \times 10^{-3}$ | $2.94 \times 10^{-2}$ | $1.85 \times 10^{-2}$  | $3.66 \times 10^{-3}$ | $4.72 \times 10^{-7}$  | $3.51 \times 10^{-3}$  | $3.25 \times 10^{-2}$ | $9.14 \times 10^{-1}$ |
| rs10959411  | $-1.99 \times 10^{-2}$ | $1.13 \times 10^{-2}$ | $7.82 \times 10^{-2}$ | $-2.43 \times 10^{-2}$ | $4.90 \times 10^{-3}$ | $7.41 \times 10^{-7}$  | $1.16 \times 10^{-2}$  | $3.88 \times 10^{-2}$ | $7.65 \times 10^{-1}$ |
| rs11030380  | $-8.95 \times 10^{-3}$ | $9.43 \times 10^{-3}$ | $3.42 \times 10^{-1}$ | $2.01 \times 10^{-2}$  | $3.63 \times 10^{-3}$ | $2.97 \times 10^{-8}$  | $-1.51 \times 10^{-3}$ | $3.26 \times 10^{-2}$ | $9.63 \times 10^{-1}$ |
| rs11073474  | $-3.32 \times 10^{-2}$ | $9.83 \times 10^{-3}$ | $7.22 \times 10^{-4}$ | $-1.98 \times 10^{-2}$ | $4.01 \times 10^{-3}$ | $7.45 \times 10^{-7}$  | $2.87 \times 10^{-2}$  | $3.39 \times 10^{-2}$ | $3.97 \times 10^{-1}$ |
| rs11076967  | $-1.87 \times 10^{-2}$ | $1.05 \times 10^{-2}$ | $7.58 \times 10^{-2}$ | $2.05 \times 10^{-2}$  | $4.14 \times 10^{-3}$ | $7.34 \times 10^{-7}$  | $-3.25 \times 10^{-2}$ | $3.67 \times 10^{-2}$ | $3.76 \times 10^{-1}$ |
| rs1109480   | $-9.37 \times 10^{-4}$ | $9.69 \times 10^{-3}$ | $9.23 \times 10^{-1}$ | $-1.88 \times 10^{-2}$ | $3.65 \times 10^{-3}$ | $2.64 \times 10^{-7}$  | $-2.21 \times 10^{-3}$ | $3.34 \times 10^{-2}$ | $9.47 \times 10^{-1}$ |
| rs1126757   | $-1.57 \times 10^{-2}$ | $9.26 \times 10^{-3}$ | $8.95 \times 10^{-2}$ | $1.87 \times 10^{-2}$  | $3.56 \times 10^{-3}$ | $1.53 \times 10^{-7}$  | $2.53 \times 10^{-3}$  | $3.21 \times 10^{-2}$ | $9.37 \times 10^{-1}$ |
| rs113230003 | $-1.77 \times 10^{-2}$ | $1.12 \times 10^{-2}$ | $1.14 \times 10^{-1}$ | $-2.06 \times 10^{-2}$ | $4.09 \times 10^{-3}$ | $5.19 \times 10^{-7}$  | $1.26 \times 10^{-1}$  | $3.78 \times 10^{-2}$ | $8.74 \times 10^{-4}$ |
| rs11675462  | $1.18 \times 10^{-2}$  | $1.08 \times 10^{-2}$ | $2.75 \times 10^{-1}$ | $2.01 \times 10^{-2}$  | $4.07 \times 10^{-3}$ | $7.69 \times 10^{-7}$  | $3.60 \times 10^{-3}$  | $3.75 \times 10^{-2}$ | $9.23 \times 10^{-1}$ |
| rs11692435  | $-1.82 \times 10^{-2}$ | $1.10 \times 10^{-2}$ | $9.81 \times 10^{-2}$ | $3.04 \times 10^{-2}$  | $6.18 \times 10^{-3}$ | $8.71 \times 10^{-7}$  | $1.54 \times 10^{-3}$  | $3.76 \times 10^{-2}$ | $9.67 \times 10^{-1}$ |
| rs117143374 | $2.09 \times 10^{-2}$  | $1.50 \times 10^{-2}$ | $1.63 \times 10^{-1}$ | $2.93 \times 10^{-2}$  | $5.27 \times 10^{-3}$ | $2.76 \times 10^{-8}$  | $-9.06 \times 10^{-3}$ | $5.25 \times 10^{-2}$ | $8.63 \times 10^{-1}$ |
| rs11716779  | $-4.94 \times 10^{-3}$ | $1.18 \times 10^{-2}$ | $6.76 \times 10^{-1}$ | $2.20 \times 10^{-2}$  | $4.03 \times 10^{-3}$ | $4.88 \times 10^{-8}$  | $4.24 \times 10^{-2}$  | $4.13 \times 10^{-2}$ | $3.05 \times 10^{-1}$ |
| rs117582306 | $5.49 \times 10^{-3}$  | $4.17 \times 10^{-2}$ | $8.95 \times 10^{-1}$ | $6.44 \times 10^{-2}$  | $1.23 \times 10^{-2}$ | $1.72 \times 10^{-7}$  | $3.17 \times 10^{-1}$  | $1.48 \times 10^{-1}$ | $3.20 \times 10^{-2}$ |
| rs11771695  | $9.62 \times 10^{-4}$  | $9.65 \times 10^{-3}$ | $9.21 \times 10^{-1}$ | $-1.86 \times 10^{-2}$ | $3.74 \times 10^{-3}$ | $7.23 \times 10^{-7}$  | $2.87 \times 10^{-2}$  | $3.34 \times 10^{-2}$ | $3.91 \times 10^{-1}$ |
| rs12036473  | $2.47 \times 10^{-3}$  | $9.29 \times 10^{-3}$ | $7.90 \times 10^{-1}$ | $1.90 \times 10^{-2}$  | $3.66 \times 10^{-3}$ | $2.31 \times 10^{-7}$  | $4.92 \times 10^{-2}$  | $3.21 \times 10^{-2}$ | $1.26 \times 10^{-1}$ |

| SNPs       | GERD                   |                       |                       | Smoking Initiation     |                       |                       | IPF                    |                       |                       |
|------------|------------------------|-----------------------|-----------------------|------------------------|-----------------------|-----------------------|------------------------|-----------------------|-----------------------|
|            | Beta                   | SE                    | P-value               | Beta                   | SE                    | P-value               | Beta                   | SE                    | P-value               |
| rs12047884 | $1.05 \times 10^{-2}$  | $9.22 \times 10^{-3}$ | $2.53 \times 10^{-1}$ | $-1.76 \times 10^{-2}$ | $3.56 \times 10^{-3}$ | $7.53 \times 10^{-7}$ | $7.43 \times 10^{-3}$  | $3.19 \times 10^{-2}$ | $8.16 \times 10^{-1}$ |
| rs12143162 | $2.49 \times 10^{-3}$  | $1.16 \times 10^{-2}$ | $8.30 \times 10^{-1}$ | $2.27 \times 10^{-2}$  | $4.50 \times 10^{-3}$ | $4.27 \times 10^{-7}$ | $2.75 \times 10^{-2}$  | $3.99 \times 10^{-2}$ | $4.90 \times 10^{-1}$ |
| rs12208141 | $-1.73 \times 10^{-2}$ | $9.35 \times 10^{-3}$ | $6.45 \times 10^{-2}$ | $-1.79 \times 10^{-2}$ | $3.63 \times 10^{-3}$ | $7.79 \times 10^{-7}$ | $3.27 \times 10^{-2}$  | $3.23 \times 10^{-2}$ | $3.12 \times 10^{-1}$ |
| rs12212878 | $-4.03 \times 10^{-2}$ | $2.95 \times 10^{-2}$ | $1.71 \times 10^{-1}$ | $-3.54 \times 10^{-2}$ | $7.20 \times 10^{-3}$ | $8.61 \times 10^{-7}$ | $1.68 \times 10^{-1}$  | $1.03 \times 10^{-1}$ | $1.02 \times 10^{-1}$ |
| rs12238219 | $5.02 \times 10^{-2}$  | $9.93 \times 10^{-3}$ | $4.25 \times 10^{-7}$ | $-3.95 \times 10^{-3}$ | $4.13 \times 10^{-3}$ | $3.39 \times 10^{-1}$ | $-5.27 \times 10^{-2}$ | $3.45 \times 10^{-2}$ | $1.26 \times 10^{-1}$ |
| rs12346687 | $-1.81 \times 10^{-3}$ | $9.40 \times 10^{-3}$ | $8.47 \times 10^{-1}$ | $1.83 \times 10^{-2}$  | $3.70 \times 10^{-3}$ | $7.43 \times 10^{-7}$ | $-1.43 \times 10^{-2}$ | $3.26 \times 10^{-2}$ | $6.60 \times 10^{-1}$ |
| rs12442894 | $8.94 \times 10^{-3}$  | $1.16 \times 10^{-2}$ | $4.39 \times 10^{-1}$ | $-2.44 \times 10^{-2}$ | $4.29 \times 10^{-3}$ | $1.28 \times 10^{-8}$ | $-4.70 \times 10^{-2}$ | $4.01 \times 10^{-2}$ | $2.41 \times 10^{-1}$ |
| rs12450454 | $7.76 \times 10^{-3}$  | $9.26 \times 10^{-3}$ | $4.02 \times 10^{-1}$ | $-2.00 \times 10^{-2}$ | $3.61 \times 10^{-3}$ | $3.04 \times 10^{-8}$ | $-5.62 \times 10^{-2}$ | $3.21 \times 10^{-2}$ | $7.97 \times 10^{-2}$ |
| rs12450454 | $1.18 \times 10^{-1}$  | $1.33 \times 10^{-1}$ | $3.76 \times 10^{-1}$ | $-2.00 \times 10^{-2}$ | $3.61 \times 10^{-3}$ | $3.04 \times 10^{-8}$ | $1.28 \times 10^{-2}$  | $4.38 \times 10^{-1}$ | $9.77 \times 10^{-1}$ |
| rs1248860  | $-1.47 \times 10^{-2}$ | $9.27 \times 10^{-3}$ | $1.12 \times 10^{-1}$ | $1.75 \times 10^{-2}$  | $3.57 \times 10^{-3}$ | $9.73 \times 10^{-7}$ | $-1.58 \times 10^{-2}$ | $3.21 \times 10^{-2}$ | $6.24 \times 10^{-1}$ |
| rs12539177 | $2.34 \times 10^{-3}$  | $9.43 \times 10^{-3}$ | $8.04 \times 10^{-1}$ | $1.84 \times 10^{-2}$  | $3.70 \times 10^{-3}$ | $6.09 \times 10^{-7}$ | $4.16 \times 10^{-2}$  | $3.27 \times 10^{-2}$ | $2.03 \times 10^{-1}$ |
| rs12612538 | $4.90 \times 10^{-2}$  | $9.45 \times 10^{-3}$ | $2.23 \times 10^{-7}$ | $-4.96 \times 10^{-3}$ | $3.65 \times 10^{-3}$ | $1.74 \times 10^{-1}$ | $2.23 \times 10^{-4}$  | $3.29 \times 10^{-2}$ | $9.95 \times 10^{-1}$ |
| rs12770588 | $2.17 \times 10^{-2}$  | $1.23 \times 10^{-2}$ | $7.71 \times 10^{-2}$ | $2.33 \times 10^{-2}$  | $4.61 \times 10^{-3}$ | $4.44 \times 10^{-7}$ | $-6.93 \times 10^{-4}$ | $4.25 \times 10^{-2}$ | $9.87 \times 10^{-1}$ |
| rs12783374 | $1.04 \times 10^{-2}$  | $1.04 \times 10^{-2}$ | $3.16 \times 10^{-1}$ | $2.06 \times 10^{-2}$  | $4.04 \times 10^{-3}$ | $3.65 \times 10^{-7}$ | $4.37 \times 10^{-3}$  | $3.59 \times 10^{-2}$ | $9.03 \times 10^{-1}$ |
| rs12786130 | $7.56 \times 10^{-3}$  | $1.11 \times 10^{-2}$ | $4.94 \times 10^{-1}$ | $-2.22 \times 10^{-2}$ | $4.15 \times 10^{-3}$ | $9.46 \times 10^{-8}$ | $-1.31 \times 10^{-2}$ | $3.85 \times 10^{-2}$ | $7.33 \times 10^{-1}$ |
| rs12874552 | $1.45 \times 10^{-2}$  | $9.71 \times 10^{-3}$ | $1.36 \times 10^{-1}$ | $-1.97 \times 10^{-2}$ | $3.60 \times 10^{-3}$ | $4.24 \times 10^{-8}$ | $4.15 \times 10^{-2}$  | $3.37 \times 10^{-2}$ | $2.18 \times 10^{-1}$ |
| rs12880545 | $-6.48 \times 10^{-3}$ | $9.84 \times 10^{-3}$ | $5.10 \times 10^{-1}$ | $1.85 \times 10^{-2}$  | $3.70 \times 10^{-3}$ | $6.19 \times 10^{-7}$ | $-2.51 \times 10^{-2}$ | $3.40 \times 10^{-2}$ | $4.61 \times 10^{-1}$ |
| rs12894851 | $-2.28 \times 10^{-2}$ | $1.44 \times 10^{-2}$ | $1.14 \times 10^{-1}$ | $-2.37 \times 10^{-2}$ | $4.78 \times 10^{-3}$ | $7.29 \times 10^{-7}$ | $-4.57 \times 10^{-2}$ | $5.02 \times 10^{-2}$ | $3.62 \times 10^{-1}$ |
| rs13025009 | $-7.04 \times 10^{-3}$ | $1.52 \times 10^{-2}$ | $6.43 \times 10^{-1}$ | $2.18 \times 10^{-2}$  | $4.45 \times 10^{-3}$ | $9.61 \times 10^{-7}$ | $1.00 \times 10^{-1}$  | $5.39 \times 10^{-2}$ | $6.33 \times 10^{-2}$ |
| rs13025213 | $1.24 \times 10^{-2}$  | $1.08 \times 10^{-2}$ | $2.51 \times 10^{-1}$ | $2.04 \times 10^{-2}$  | $4.02 \times 10^{-3}$ | $3.98 \times 10^{-7}$ | $3.12 \times 10^{-2}$  | $3.74 \times 10^{-2}$ | $4.04 \times 10^{-1}$ |
| rs13136052 | $-9.14 \times 10^{-3}$ | $9.38 \times 10^{-3}$ | $3.30 \times 10^{-1}$ | $-1.98 \times 10^{-2}$ | $3.59 \times 10^{-3}$ | $3.35 \times 10^{-8}$ | $-2.27 \times 10^{-2}$ | $3.26 \times 10^{-2}$ | $4.86 \times 10^{-1}$ |
| rs13140558 | $5.95 \times 10^{-2}$  | $1.20 \times 10^{-2}$ | $7.84 \times 10^{-7}$ | $3.29 \times 10^{-3}$  | $4.22 \times 10^{-3}$ | $4.36 \times 10^{-1}$ | $-5.63 \times 10^{-3}$ | $4.22 \times 10^{-2}$ | $8.94 \times 10^{-1}$ |

| SNPs        | GERD                   |                       |                       | Smoking Initiation     |                       |                       | IPF                    |                       |                       |
|-------------|------------------------|-----------------------|-----------------------|------------------------|-----------------------|-----------------------|------------------------|-----------------------|-----------------------|
|             | Beta                   | SE                    | <i>P</i> -value       | Beta                   | SE                    | <i>P</i> -value       | Beta                   | SE                    | <i>P</i> -value       |
| rs13391128  | $1.96 \times 10^{-2}$  | $1.44 \times 10^{-2}$ | $1.75 \times 10^{-1}$ | $2.79 \times 10^{-2}$  | $5.34 \times 10^{-3}$ | $1.70 \times 10^{-7}$ | $-4.85 \times 10^{-2}$ | $5.02 \times 10^{-2}$ | $3.34 \times 10^{-1}$ |
| rs1343424   | $-1.87 \times 10^{-3}$ | $1.15 \times 10^{-2}$ | $8.71 \times 10^{-1}$ | $2.28 \times 10^{-2}$  | $4.17 \times 10^{-3}$ | $4.67 \times 10^{-8}$ | $1.76 \times 10^{-2}$  | $4.00 \times 10^{-2}$ | $6.60 \times 10^{-1}$ |
| rs134529    | $-5.28 \times 10^{-3}$ | $9.79 \times 10^{-3}$ | $5.90 \times 10^{-1}$ | $-2.00 \times 10^{-2}$ | $3.66 \times 10^{-3}$ | $4.85 \times 10^{-8}$ | $1.91 \times 10^{-2}$  | $3.38 \times 10^{-2}$ | $5.72 \times 10^{-1}$ |
| rs1350035   | $-2.61 \times 10^{-2}$ | $9.23 \times 10^{-3}$ | $4.70 \times 10^{-3}$ | $-1.80 \times 10^{-2}$ | $3.65 \times 10^{-3}$ | $8.16 \times 10^{-7}$ | $-1.03 \times 10^{-1}$ | $3.18 \times 10^{-2}$ | $1.14 \times 10^{-3}$ |
| rs1392510   | $-1.04 \times 10^{-2}$ | $1.25 \times 10^{-2}$ | $4.05 \times 10^{-1}$ | $2.76 \times 10^{-2}$  | $5.11 \times 10^{-3}$ | $6.84 \times 10^{-8}$ | $-1.96 \times 10^{-2}$ | $4.27 \times 10^{-2}$ | $6.46 \times 10^{-1}$ |
| rs1427499   | $-1.56 \times 10^{-3}$ | $9.95 \times 10^{-3}$ | $8.75 \times 10^{-1}$ | $-2.24 \times 10^{-2}$ | $3.92 \times 10^{-3}$ | $1.08 \times 10^{-8}$ | $-2.58 \times 10^{-2}$ | $3.45 \times 10^{-2}$ | $4.54 \times 10^{-1}$ |
| rs1466802   | $3.09 \times 10^{-2}$  | $1.11 \times 10^{-2}$ | $5.26 \times 10^{-3}$ | $2.35 \times 10^{-2}$  | $4.21 \times 10^{-3}$ | $2.21 \times 10^{-8}$ | $3.14 \times 10^{-2}$  | $3.82 \times 10^{-2}$ | $4.10 \times 10^{-1}$ |
| rs147662818 | $4.04 \times 10^{-2}$  | $2.19 \times 10^{-2}$ | $6.58 \times 10^{-2}$ | $1.02 \times 10^{-1}$  | $1.90 \times 10^{-2}$ | $7.25 \times 10^{-8}$ | $-1.81 \times 10^{-2}$ | $7.47 \times 10^{-2}$ | $8.08 \times 10^{-1}$ |
| rs1505800   | $-1.65 \times 10^{-3}$ | $1.10 \times 10^{-2}$ | $8.81 \times 10^{-1}$ | $-2.01 \times 10^{-2}$ | $4.02 \times 10^{-3}$ | $6.15 \times 10^{-7}$ | $2.86 \times 10^{-2}$  | $3.85 \times 10^{-2}$ | $4.57 \times 10^{-1}$ |
| rs152567    | $2.03 \times 10^{-2}$  | $9.95 \times 10^{-3}$ | $4.14 \times 10^{-2}$ | $-2.01 \times 10^{-2}$ | $3.70 \times 10^{-3}$ | $5.93 \times 10^{-8}$ | $-3.94 \times 10^{-3}$ | $3.46 \times 10^{-2}$ | $9.09 \times 10^{-1}$ |
| rs1545506   | $1.52 \times 10^{-2}$  | $9.24 \times 10^{-3}$ | $1.00 \times 10^{-1}$ | $1.80 \times 10^{-2}$  | $3.56 \times 10^{-3}$ | $4.41 \times 10^{-7}$ | $5.52 \times 10^{-2}$  | $3.19 \times 10^{-2}$ | $8.36 \times 10^{-2}$ |
| rs17144411  | $1.59 \times 10^{-2}$  | $1.33 \times 10^{-2}$ | $2.34 \times 10^{-1}$ | $2.32 \times 10^{-2}$  | $4.64 \times 10^{-3}$ | $5.52 \times 10^{-7}$ | $3.53 \times 10^{-2}$  | $4.63 \times 10^{-2}$ | $4.46 \times 10^{-1}$ |
| rs17403088  | $7.36 \times 10^{-3}$  | $1.25 \times 10^{-2}$ | $5.55 \times 10^{-1}$ | $-2.27 \times 10^{-2}$ | $4.64 \times 10^{-3}$ | $9.48 \times 10^{-7}$ | $5.17 \times 10^{-2}$  | $4.34 \times 10^{-2}$ | $2.34 \times 10^{-1}$ |
| rs17613129  | $2.78 \times 10^{-2}$  | $1.01 \times 10^{-2}$ | $6.20 \times 10^{-3}$ | $2.19 \times 10^{-2}$  | $3.90 \times 10^{-3}$ | $1.89 \times 10^{-8}$ | $8.88 \times 10^{-3}$  | $3.53 \times 10^{-2}$ | $8.01 \times 10^{-1}$ |
| rs1805871   | $1.49 \times 10^{-2}$  | $9.35 \times 10^{-3}$ | $1.12 \times 10^{-1}$ | $1.85 \times 10^{-2}$  | $3.76 \times 10^{-3}$ | $8.10 \times 10^{-7}$ | $3.80 \times 10^{-2}$  | $3.23 \times 10^{-2}$ | $2.39 \times 10^{-1}$ |
| rs1841252   | $-2.74 \times 10^{-2}$ | $9.43 \times 10^{-3}$ | $3.68 \times 10^{-3}$ | $-1.88 \times 10^{-2}$ | $3.56 \times 10^{-3}$ | $1.23 \times 10^{-7}$ | $-4.90 \times 10^{-2}$ | $3.26 \times 10^{-2}$ | $1.33 \times 10^{-1}$ |
| rs1853599   | $-8.97 \times 10^{-3}$ | $9.76 \times 10^{-3}$ | $3.58 \times 10^{-1}$ | $2.03 \times 10^{-2}$  | $3.77 \times 10^{-3}$ | $7.39 \times 10^{-8}$ | $5.74 \times 10^{-2}$  | $3.38 \times 10^{-2}$ | $8.91 \times 10^{-2}$ |
| rs1856047   | $2.00 \times 10^{-3}$  | $9.45 \times 10^{-3}$ | $8.33 \times 10^{-1}$ | $-1.87 \times 10^{-2}$ | $3.58 \times 10^{-3}$ | $1.97 \times 10^{-7}$ | $5.33 \times 10^{-2}$  | $3.28 \times 10^{-2}$ | $1.04 \times 10^{-1}$ |
| rs1895947   | $3.87 \times 10^{-3}$  | $1.06 \times 10^{-2}$ | $7.15 \times 10^{-1}$ | $2.06 \times 10^{-2}$  | $4.17 \times 10^{-3}$ | $8.46 \times 10^{-7}$ | $5.88 \times 10^{-3}$  | $3.65 \times 10^{-2}$ | $8.72 \times 10^{-1}$ |
| rs1898428   | $9.72 \times 10^{-4}$  | $9.25 \times 10^{-3}$ | $9.16 \times 10^{-1}$ | $1.78 \times 10^{-2}$  | $3.56 \times 10^{-3}$ | $5.31 \times 10^{-7}$ | $4.14 \times 10^{-2}$  | $3.21 \times 10^{-2}$ | $1.97 \times 10^{-1}$ |
| rs1899492   | $1.09 \times 10^{-2}$  | $9.23 \times 10^{-3}$ | $2.38 \times 10^{-1}$ | $1.86 \times 10^{-2}$  | $3.56 \times 10^{-3}$ | $1.87 \times 10^{-7}$ | $-8.19 \times 10^{-2}$ | $3.19 \times 10^{-2}$ | $1.04 \times 10^{-2}$ |
| rs1910236   | $1.24 \times 10^{-3}$  | $9.23 \times 10^{-3}$ | $8.93 \times 10^{-1}$ | $1.92 \times 10^{-2}$  | $3.56 \times 10^{-3}$ | $6.44 \times 10^{-8}$ | $-3.88 \times 10^{-2}$ | $3.19 \times 10^{-2}$ | $2.24 \times 10^{-1}$ |

| SNPs       | GERD                   |                       |                       | Smoking Initiation     |                       |                        | IPF                    |                       |                       |
|------------|------------------------|-----------------------|-----------------------|------------------------|-----------------------|------------------------|------------------------|-----------------------|-----------------------|
|            | Beta                   | SE                    | <i>P</i> -value       | Beta                   | SE                    | <i>P</i> -value        | Beta                   | SE                    | <i>P</i> -value       |
| rs1935958  | $-1.42 \times 10^{-2}$ | $1.40 \times 10^{-2}$ | $3.12 \times 10^{-1}$ | $-2.47 \times 10^{-2}$ | $4.95 \times 10^{-3}$ | $6.45 \times 10^{-7}$  | $-3.49 \times 10^{-2}$ | $4.89 \times 10^{-2}$ | $4.76 \times 10^{-1}$ |
| rs2017500  | $1.02 \times 10^{-3}$  | $9.23 \times 10^{-3}$ | $9.12 \times 10^{-1}$ | $1.79 \times 10^{-2}$  | $3.56 \times 10^{-3}$ | $4.96 \times 10^{-7}$  | $-2.29 \times 10^{-2}$ | $3.20 \times 10^{-2}$ | $4.74 \times 10^{-1}$ |
| rs2035284  | $1.10 \times 10^{-2}$  | $1.04 \times 10^{-2}$ | $2.90 \times 10^{-1}$ | $-1.89 \times 10^{-2}$ | $3.86 \times 10^{-3}$ | $9.77 \times 10^{-7}$  | $3.50 \times 10^{-2}$  | $3.61 \times 10^{-2}$ | $3.31 \times 10^{-1}$ |
| rs2058799  | $3.15 \times 10^{-3}$  | $9.21 \times 10^{-3}$ | $7.32 \times 10^{-1}$ | $1.92 \times 10^{-2}$  | $3.60 \times 10^{-3}$ | $9.32 \times 10^{-8}$  | $-6.65 \times 10^{-2}$ | $3.19 \times 10^{-2}$ | $8.35 \times 10^{-1}$ |
| rs2074640  | $-7.90 \times 10^{-3}$ | $1.11 \times 10^{-2}$ | $4.76 \times 10^{-1}$ | $1.94 \times 10^{-2}$  | $3.89 \times 10^{-3}$ | $5.88 \times 10^{-7}$  | $-6.34 \times 10^{-3}$ | $3.85 \times 10^{-2}$ | $8.69 \times 10^{-1}$ |
| rs2120459  | $8.11 \times 10^{-3}$  | $1.09 \times 10^{-2}$ | $4.55 \times 10^{-1}$ | $1.94 \times 10^{-2}$  | $3.91 \times 10^{-3}$ | $7.36 \times 10^{-7}$  | $-4.08 \times 10^{-2}$ | $3.77 \times 10^{-2}$ | $2.80 \times 10^{-1}$ |
| rs2173019  | $3.58 \times 10^{-3}$  | $1.35 \times 10^{-2}$ | $7.90 \times 10^{-1}$ | $2.40 \times 10^{-2}$  | $4.68 \times 10^{-3}$ | $2.76 \times 10^{-7}$  | $2.39 \times 10^{-2}$  | $4.68 \times 10^{-2}$ | $6.09 \times 10^{-1}$ |
| rs2256027  | $6.29 \times 10^{-2}$  | $3.50 \times 10^{-2}$ | $7.21 \times 10^{-2}$ | $5.42 \times 10^{-2}$  | $1.06 \times 10^{-3}$ | $3.61 \times 10^{-7}$  | $1.11 \times 10^{-1}$  | $1.19 \times 10^{-1}$ | $3.50 \times 10^{-1}$ |
| rs2281756  | $-4.59 \times 10^{-3}$ | $9.32 \times 10^{-3}$ | $6.22 \times 10^{-1}$ | $-2.01 \times 10^{-2}$ | $3.61 \times 10^{-3}$ | $2.71 \times 10^{-7}$  | $-1.08 \times 10^{-2}$ | $3.22 \times 10^{-2}$ | $7.37 \times 10^{-1}$ |
| rs2435207  | $6.98 \times 10^{-3}$  | $9.37 \times 10^{-3}$ | $4.56 \times 10^{-1}$ | $1.88 \times 10^{-2}$  | $3.80 \times 10^{-3}$ | $7.36 \times 10^{-7}$  | $4.12 \times 10^{-2}$  | $3.24 \times 10^{-2}$ | $2.04 \times 10^{-1}$ |
| rs2551456  | $1.97 \times 10^{-3}$  | $9.32 \times 10^{-3}$ | $8.32 \times 10^{-1}$ | $1.79 \times 10^{-2}$  | $3.58 \times 10^{-3}$ | $5.50 \times 10^{-7}$  | $-4.27 \times 10^{-2}$ | $3.23 \times 10^{-2}$ | $1.86 \times 10^{-1}$ |
| rs2591152  | $2.65 \times 10^{-3}$  | $9.29 \times 10^{-3}$ | $7.76 \times 10^{-1}$ | $1.89 \times 10^{-2}$  | $3.59 \times 10^{-3}$ | $1.50 \times 10^{-7}$  | $6.29 \times 10^{-2}$  | $3.21 \times 10^{-2}$ | $5.05 \times 10^{-2}$ |
| rs2675609  | $9.29 \times 10^{-3}$  | $9.46 \times 10^{-3}$ | $3.26 \times 10^{-1}$ | $-1.91 \times 10^{-2}$ | $3.67 \times 10^{-3}$ | $1.95 \times 10^{-7}$  | $3.06 \times 10^{-2}$  | $3.27 \times 10^{-2}$ | $3.49 \times 10^{-1}$ |
| rs2710634  | $-2.31 \times 10^{-2}$ | $9.24 \times 10^{-3}$ | $1.22 \times 10^{-2}$ | $-1.82 \times 10^{-2}$ | $3.56 \times 10^{-3}$ | $3.07 \times 10^{-7}$  | $2.09 \times 10^{-2}$  | $3.20 \times 10^{-2}$ | $5.13 \times 10^{-1}$ |
| rs2717068  | $1.25 \times 10^{-2}$  | $9.50 \times 10^{-3}$ | $1.89 \times 10^{-1}$ | $1.81 \times 10^{-2}$  | $3.65 \times 10^{-3}$ | $7.57 \times 10^{-7}$  | $8.29 \times 10^{-3}$  | $3.29 \times 10^{-2}$ | $8.01 \times 10^{-1}$ |
| rs2730850  | $1.40 \times 10^{-3}$  | $1.33 \times 10^{-2}$ | $9.16 \times 10^{-1}$ | $2.63 \times 10^{-2}$  | $5.38 \times 10^{-3}$ | $9.95 \times 10^{-7}$  | $8.42 \times 10^{-4}$  | $4.59 \times 10^{-2}$ | $9.85 \times 10^{-1}$ |
| rs284843   | $1.02 \times 10^{-3}$  | $9.61 \times 10^{-3}$ | $9.16 \times 10^{-1}$ | $-2.00 \times 10^{-2}$ | $4.08 \times 10^{-3}$ | $9.42 \times 10^{-7}$  | $-2.57 \times 10^{-2}$ | $3.32 \times 10^{-2}$ | $4.38 \times 10^{-1}$ |
| rs28585984 | $-1.03 \times 10^{-2}$ | $1.02 \times 10^{-2}$ | $3.13 \times 10^{-1}$ | $-1.92 \times 10^{-2}$ | $3.86 \times 10^{-3}$ | $6.66 \times 10^{-7}$  | $-5.57 \times 10^{-2}$ | $3.53 \times 10^{-2}$ | $1.15 \times 10^{-1}$ |
| rs2867105  | $-1.28 \times 10^{-2}$ | $1.22 \times 10^{-2}$ | $2.95 \times 10^{-1}$ | $3.17 \times 10^{-2}$  | $4.65 \times 10^{-3}$ | $9.21 \times 10^{-12}$ | $2.87 \times 10^{-2}$  | $4.26 \times 10^{-2}$ | $5.01 \times 10^{-1}$ |
| rs293055   | $1.28 \times 10^{-2}$  | $9.26 \times 10^{-3}$ | $1.67 \times 10^{-1}$ | $2.17 \times 10^{-2}$  | $3.56 \times 10^{-3}$ | $1.17 \times 10^{-9}$  | $3.84 \times 10^{-2}$  | $3.21 \times 10^{-2}$ | $2.31 \times 10^{-1}$ |
| rs2952251  | $1.29 \times 10^{-2}$  | $1.10 \times 10^{-2}$ | $2.38 \times 10^{-1}$ | $2.21 \times 10^{-2}$  | $4.29 \times 10^{-3}$ | $2.51 \times 10^{-7}$  | $4.32 \times 10^{-2}$  | $3.81 \times 10^{-2}$ | $2.56 \times 10^{-1}$ |
| rs2958853  | $-4.13 \times 10^{-3}$ | $9.20 \times 10^{-3}$ | $6.53 \times 10^{-1}$ | $-1.77 \times 10^{-2}$ | $3.56 \times 10^{-3}$ | $6.40 \times 10^{-7}$  | $3.71 \times 10^{-2}$  | $3.18 \times 10^{-2}$ | $2.44 \times 10^{-1}$ |

| SNPs       | GERD                   |                       |                       | Smoking Initiation     |                       |                       | IPF                    |                       |                       |
|------------|------------------------|-----------------------|-----------------------|------------------------|-----------------------|-----------------------|------------------------|-----------------------|-----------------------|
|            | Beta                   | SE                    | P-value               | Beta                   | SE                    | P-value               | Beta                   | SE                    | P-value               |
| rs2959100  | $8.52 \times 10^{-3}$  | $9.22 \times 10^{-3}$ | $3.55 \times 10^{-1}$ | $-1.87 \times 10^{-2}$ | $3.58 \times 10^{-3}$ | $1.75 \times 10^{-7}$ | $2.44 \times 10^{-2}$  | $3.19 \times 10^{-2}$ | $4.45 \times 10^{-1}$ |
| rs310333   | $4.87 \times 10^{-4}$  | $9.89 \times 10^{-3}$ | $9.61 \times 10^{-1}$ | $1.96 \times 10^{-2}$  | $3.95 \times 10^{-3}$ | $6.65 \times 10^{-7}$ | $5.46 \times 10^{-2}$  | $3.42 \times 10^{-2}$ | $1.11 \times 10^{-1}$ |
| rs317630   | $-3.50 \times 10^{-3}$ | $9.61 \times 10^{-3}$ | $7.16 \times 10^{-1}$ | $-2.25 \times 10^{-2}$ | $3.97 \times 10^{-3}$ | $1.49 \times 10^{-8}$ | $6.15 \times 10^{-2}$  | $3.33 \times 10^{-2}$ | $6.48 \times 10^{-2}$ |
| rs3213876  | $-2.51 \times 10^{-2}$ | $1.00 \times 10^{-2}$ | $1.21 \times 10^{-2}$ | $1.93 \times 10^{-2}$  | $3.73 \times 10^{-3}$ | $2.24 \times 10^{-7}$ | $-3.82 \times 10^{-2}$ | $3.48 \times 10^{-2}$ | $2.73 \times 10^{-1}$ |
| rs324768   | $-2.67 \times 10^{-2}$ | $9.27 \times 10^{-3}$ | $4.05 \times 10^{-3}$ | $-1.81 \times 10^{-2}$ | $3.65 \times 10^{-3}$ | $6.92 \times 10^{-7}$ | $3.25 \times 10^{-2}$  | $3.21 \times 10^{-2}$ | $3.12 \times 10^{-1}$ |
| rs34724099 | $7.20 \times 10^{-3}$  | $1.02 \times 10^{-2}$ | $4.82 \times 10^{-1}$ | $2.05 \times 10^{-2}$  | $3.95 \times 10^{-3}$ | $2.01 \times 10^{-7}$ | $8.38 \times 10^{-3}$  | $3.55 \times 10^{-2}$ | $8.13 \times 10^{-1}$ |
| rs35733856 | $2.29 \times 10^{-2}$  | $9.22 \times 10^{-3}$ | $1.31 \times 10^{-2}$ | $1.91 \times 10^{-2}$  | $3.63 \times 10^{-3}$ | $1.32 \times 10^{-7}$ | $4.87 \times 10^{-2}$  | $3.19 \times 10^{-2}$ | $1.27 \times 10^{-1}$ |
| rs35887108 | $-1.75 \times 10^{-2}$ | $1.02 \times 10^{-2}$ | $8.60 \times 10^{-2}$ | $-2.09 \times 10^{-2}$ | $4.27 \times 10^{-3}$ | $9.74 \times 10^{-7}$ | $-3.22 \times 10^{-2}$ | $3.52 \times 10^{-2}$ | $3.60 \times 10^{-1}$ |
| rs36110110 | $3.84 \times 10^{-1}$  | $7.57 \times 10^{-2}$ | $3.86 \times 10^{-7}$ | $1.09 \times 10^{-2}$  | $1.81 \times 10^{-2}$ | $5.47 \times 10^{-1}$ | $-3.95 \times 10^{-1}$ | $3.09 \times 10^{-1}$ | $2.01 \times 10^{-1}$ |
| rs3815195  | $6.07 \times 10^{-3}$  | $9.30 \times 10^{-3}$ | $5.14 \times 10^{-1}$ | $-1.77 \times 10^{-2}$ | $3.56 \times 10^{-3}$ | $6.81 \times 10^{-7}$ | $2.51 \times 10^{-2}$  | $3.22 \times 10^{-2}$ | $4.35 \times 10^{-1}$ |
| rs41264285 | $3.18 \times 10^{-3}$  | $1.21 \times 10^{-2}$ | $7.92 \times 10^{-1}$ | $2.31 \times 10^{-2}$  | $4.28 \times 10^{-3}$ | $6.76 \times 10^{-8}$ | $-9.91 \times 10^{-2}$ | $4.19 \times 10^{-2}$ | $1.81 \times 10^{-2}$ |
| rs41274959 | $-3.04 \times 10^{-2}$ | $5.27 \times 10^{-2}$ | $5.65 \times 10^{-1}$ | $-4.80 \times 10^{-2}$ | $9.22 \times 10^{-3}$ | $1.93 \times 10^{-7}$ | $6.62 \times 10^{-2}$  | $1.89 \times 10^{-1}$ | $7.26 \times 10^{-1}$ |
| rs4269485  | $-4.88 \times 10^{-2}$ | $9.20 \times 10^{-3}$ | $1.10 \times 10^{-7}$ | $1.64 \times 10^{-3}$  | $3.83 \times 10^{-3}$ | $6.69 \times 10^{-1}$ | $-3.79 \times 10^{-2}$ | $3.20 \times 10^{-2}$ | $2.36 \times 10^{-1}$ |
| rs4290831  | $1.53 \times 10^{-2}$  | $1.29 \times 10^{-2}$ | $2.38 \times 10^{-1}$ | $3.19 \times 10^{-2}$  | $6.31 \times 10^{-3}$ | $4.14 \times 10^{-7}$ | $-1.95 \times 10^{-2}$ | $4.42 \times 10^{-2}$ | $6.59 \times 10^{-1}$ |
| rs430943   | $2.14 \times 10^{-3}$  | $1.06 \times 10^{-2}$ | $8.40 \times 10^{-1}$ | $2.46 \times 10^{-2}$  | $4.11 \times 10^{-3}$ | $2.13 \times 10^{-9}$ | $7.53 \times 10^{-2}$  | $3.67 \times 10^{-2}$ | $3.98 \times 10^{-2}$ |
| rs4310854  | $-4.30 \times 10^{-3}$ | $9.27 \times 10^{-3}$ | $6.43 \times 10^{-1}$ | $-1.81 \times 10^{-2}$ | $3.63 \times 10^{-3}$ | $6.23 \times 10^{-7}$ | $3.48 \times 10^{-2}$  | $3.20 \times 10^{-2}$ | $2.77 \times 10^{-1}$ |
| rs4471123  | $9.57 \times 10^{-3}$  | $9.18 \times 10^{-3}$ | $2.97 \times 10^{-1}$ | $1.99 \times 10^{-2}$  | $3.56 \times 10^{-3}$ | $2.23 \times 10^{-8}$ | $-2.80 \times 10^{-2}$ | $3.19 \times 10^{-2}$ | $3.80 \times 10^{-1}$ |
| rs4480845  | $1.09 \times 10^{-2}$  | $9.54 \times 10^{-3}$ | $2.55 \times 10^{-1}$ | $1.82 \times 10^{-2}$  | $3.69 \times 10^{-3}$ | $8.65 \times 10^{-7}$ | $3.81 \times 10^{-2}$  | $3.31 \times 10^{-2}$ | $2.49 \times 10^{-1}$ |
| rs4543050  | $-6.49 \times 10^{-3}$ | $1.33 \times 10^{-2}$ | $6.25 \times 10^{-1}$ | $2.60 \times 10^{-2}$  | $4.58 \times 10^{-3}$ | $1.39 \times 10^{-8}$ | $4.04 \times 10^{-3}$  | $4.61 \times 10^{-2}$ | $9.30 \times 10^{-1}$ |
| rs4667082  | $5.83 \times 10^{-3}$  | $1.05 \times 10^{-2}$ | $5.78 \times 10^{-1}$ | $2.11 \times 10^{-2}$  | $4.08 \times 10^{-3}$ | $2.55 \times 10^{-7}$ | $-2.63 \times 10^{-2}$ | $3.63 \times 10^{-2}$ | $4.68 \times 10^{-1}$ |
| rs4714070  | $9.35 \times 10^{-3}$  | $9.21 \times 10^{-3}$ | $3.10 \times 10^{-1}$ | $-1.76 \times 10^{-2}$ | $3.56 \times 10^{-3}$ | $7.58 \times 10^{-7}$ | $3.53 \times 10^{-2}$  | $3.19 \times 10^{-2}$ | $2.69 \times 10^{-1}$ |
| rs4725102  | $1.71 \times 10^{-1}$  | $3.47 \times 10^{-2}$ | $8.36 \times 10^{-7}$ | $-7.58 \times 10^{-3}$ | $1.21 \times 10^{-2}$ | $5.32 \times 10^{-1}$ | $-7.99 \times 10^{-2}$ | $1.14 \times 10^{-1}$ | $4.85 \times 10^{-1}$ |

| SNPs       | GERD                   |                       |                       | Smoking Initiation     |                       |                        | IPF                    |                       |                       |
|------------|------------------------|-----------------------|-----------------------|------------------------|-----------------------|------------------------|------------------------|-----------------------|-----------------------|
|            | Beta                   | SE                    | P-value               | Beta                   | SE                    | P-value                | Beta                   | SE                    | P-value               |
| rs4730345  | $2.44 \times 10^{-2}$  | $9.24 \times 10^{-3}$ | $8.41 \times 10^{-3}$ | $1.83 \times 10^{-2}$  | $3.59 \times 10^{-3}$ | $3.38 \times 10^{-7}$  | $8.61 \times 10^{-3}$  | $3.19 \times 10^{-2}$ | $7.87 \times 10^{-1}$ |
| rs4731959  | $-1.47 \times 10^{-2}$ | $1.27 \times 10^{-2}$ | $2.46 \times 10^{-1}$ | $-2.20 \times 10^{-2}$ | $4.47 \times 10^{-3}$ | $8.72 \times 10^{-7}$  | $-9.94 \times 10^{-3}$ | $4.41 \times 10^{-2}$ | $8.22 \times 10^{-1}$ |
| rs4752018  | $2.65 \times 10^{-2}$  | $1.16 \times 10^{-2}$ | $2.23 \times 10^{-2}$ | $2.08 \times 10^{-2}$  | $4.23 \times 10^{-3}$ | $9.34 \times 10^{-7}$  | $7.61 \times 10^{-2}$  | $4.04 \times 10^{-2}$ | $5.93 \times 10^{-2}$ |
| rs4811626  | $2.48 \times 10^{-2}$  | $9.25 \times 10^{-3}$ | $7.38 \times 10^{-3}$ | $-1.91 \times 10^{-2}$ | $3.60 \times 10^{-3}$ | $1.14 \times 10^{-7}$  | $1.63 \times 10^{-2}$  | $3.19 \times 10^{-2}$ | $6.10 \times 10^{-1}$ |
| rs4911252  | $5.99 \times 10^{-3}$  | $9.23 \times 10^{-3}$ | $5.16 \times 10^{-1}$ | $1.90 \times 10^{-2}$  | $3.60 \times 10^{-3}$ | $1.32 \times 10^{-7}$  | $5.29 \times 10^{-2}$  | $3.19 \times 10^{-2}$ | $9.74 \times 10^{-2}$ |
| rs508544   | $-1.65 \times 10^{-2}$ | $9.29 \times 10^{-3}$ | $7.49 \times 10^{-2}$ | $1.86 \times 10^{-2}$  | $3.56 \times 10^{-3}$ | $1.88 \times 10^{-7}$  | $-6.02 \times 10^{-3}$ | $3.21 \times 10^{-2}$ | $8.51 \times 10^{-1}$ |
| rs530647   | $-4.59 \times 10^{-4}$ | $9.26 \times 10^{-3}$ | $9.60 \times 10^{-1}$ | $1.75 \times 10^{-2}$  | $3.57 \times 10^{-3}$ | $9.51 \times 10^{-7}$  | $-9.42 \times 10^{-3}$ | $3.21 \times 10^{-2}$ | $7.69 \times 10^{-1}$ |
| rs55968130 | $3.70 \times 10^{-3}$  | $1.34 \times 10^{-2}$ | $7.83 \times 10^{-1}$ | $3.00 \times 10^{-2}$  | $5.90 \times 10^{-3}$ | $3.88 \times 10^{-7}$  | $4.16 \times 10^{-2}$  | $4.66 \times 10^{-2}$ | $3.72 \times 10^{-1}$ |
| rs55974445 | $-8.21 \times 10^{-4}$ | $1.00 \times 10^{-2}$ | $9.35 \times 10^{-1}$ | $-2.49 \times 10^{-2}$ | $3.90 \times 10^{-3}$ | $1.59 \times 10^{-10}$ | $-4.73 \times 10^{-2}$ | $3.48 \times 10^{-2}$ | $1.74 \times 10^{-1}$ |
| rs597041   | $1.35 \times 10^{-2}$  | $9.22 \times 10^{-3}$ | $1.42 \times 10^{-1}$ | $-1.78 \times 10^{-2}$ | $3.56 \times 10^{-3}$ | $6.17 \times 10^{-7}$  | $-7.13 \times 10^{-2}$ | $3.19 \times 10^{-2}$ | $8.23 \times 10^{-1}$ |
| rs5995826  | $8.87 \times 10^{-3}$  | $9.41 \times 10^{-3}$ | $3.46 \times 10^{-1}$ | $1.84 \times 10^{-2}$  | $3.63 \times 10^{-3}$ | $4.27 \times 10^{-7}$  | $4.29 \times 10^{-2}$  | $3.26 \times 10^{-2}$ | $1.88 \times 10^{-1}$ |
| rs6087600  | $-4.24 \times 10^{-3}$ | $9.26 \times 10^{-3}$ | $6.47 \times 10^{-1}$ | $-1.85 \times 10^{-2}$ | $3.76 \times 10^{-3}$ | $8.47 \times 10^{-7}$  | $-1.73 \times 10^{-2}$ | $3.21 \times 10^{-2}$ | $5.90 \times 10^{-1}$ |
| rs61246633 | $-1.16 \times 10^{-2}$ | $1.95 \times 10^{-3}$ | $5.53 \times 10^{-1}$ | $-3.11 \times 10^{-2}$ | $6.07 \times 10^{-3}$ | $3.05 \times 10^{-7}$  | $1.02 \times 10^{-2}$  | $6.92 \times 10^{-2}$ | $8.83 \times 10^{-1}$ |
| rs61805526 | $-1.99 \times 10^{-2}$ | $1.23 \times 10^{-2}$ | $1.05 \times 10^{-1}$ | $-2.73 \times 10^{-2}$ | $5.52 \times 10^{-3}$ | $7.74 \times 10^{-7}$  | $5.31 \times 10^{-2}$  | $4.21 \times 10^{-2}$ | $2.07 \times 10^{-1}$ |
| rs62250723 | $1.17 \times 10^{-2}$  | $1.14 \times 10^{-2}$ | $3.04 \times 10^{-1}$ | $-2.13 \times 10^{-2}$ | $4.28 \times 10^{-3}$ | $6.75 \times 10^{-7}$  | $4.13 \times 10^{-3}$  | $3.96 \times 10^{-2}$ | $9.17 \times 10^{-1}$ |
| rs6497753  | $-6.39 \times 10^{-3}$ | $1.02 \times 10^{-2}$ | $5.32 \times 10^{-1}$ | $1.89 \times 10^{-2}$  | $3.85 \times 10^{-3}$ | $8.87 \times 10^{-7}$  | $1.71 \times 10^{-2}$  | $3.53 \times 10^{-2}$ | $6.29 \times 10^{-1}$ |
| rs6549362  | $1.21 \times 10^{-2}$  | $1.10 \times 10^{-2}$ | $2.69 \times 10^{-1}$ | $-1.93 \times 10^{-2}$ | $3.93 \times 10^{-3}$ | $9.42 \times 10^{-7}$  | $6.57 \times 10^{-2}$  | $3.80 \times 10^{-2}$ | $8.43 \times 10^{-2}$ |
| rs6600376  | $-2.31 \times 10^{-2}$ | $1.00 \times 10^{-2}$ | $2.12 \times 10^{-2}$ | $1.88 \times 10^{-2}$  | $3.83 \times 10^{-3}$ | $9.73 \times 10^{-7}$  | $1.13 \times 10^{-2}$  | $3.47 \times 10^{-2}$ | $7.44 \times 10^{-1}$ |
| rs6665145  | $-1.08 \times 10^{-2}$ | $1.00 \times 10^{-2}$ | $2.79 \times 10^{-1}$ | $-1.86 \times 10^{-2}$ | $3.69 \times 10^{-3}$ | $4.76 \times 10^{-7}$  | $-2.86 \times 10^{-2}$ | $3.48 \times 10^{-2}$ | $4.11 \times 10^{-1}$ |
| rs6668412  | $-1.83 \times 10^{-2}$ | $9.27 \times 10^{-3}$ | $4.87 \times 10^{-2}$ | $1.83 \times 10^{-2}$  | $3.56 \times 10^{-3}$ | $2.63 \times 10^{-7}$  | $-1.14 \times 10^{-2}$ | $3.21 \times 10^{-2}$ | $7.22 \times 10^{-1}$ |
| rs6691053  | $-8.99 \times 10^{-3}$ | $1.19 \times 10^{-2}$ | $4.49 \times 10^{-1}$ | $-2.20 \times 10^{-2}$ | $4.40 \times 10^{-3}$ | $5.38 \times 10^{-7}$  | $2.25 \times 10^{-2}$  | $4.10 \times 10^{-2}$ | $5.83 \times 10^{-1}$ |
| rs66994942 | $3.68 \times 10^{-3}$  | $9.28 \times 10^{-3}$ | $6.92 \times 10^{-1}$ | $1.87 \times 10^{-2}$  | $3.70 \times 10^{-3}$ | $4.20 \times 10^{-7}$  | $8.61 \times 10^{-3}$  | $3.19 \times 10^{-2}$ | $7.87 \times 10^{-1}$ |



| SNPs       | GERD                   |                       |                       | Smoking Initiation     |                       |                        | IPF                    |                       |                       |
|------------|------------------------|-----------------------|-----------------------|------------------------|-----------------------|------------------------|------------------------|-----------------------|-----------------------|
|            | Beta                   | SE                    | P-value               | Beta                   | SE                    | P-value                | Beta                   | SE                    | P-value               |
| rs6717424  | $-2.41 \times 10^{-2}$ | $9.67 \times 10^{-3}$ | $1.27 \times 10^{-2}$ | $2.74 \times 10^{-2}$  | $3.60 \times 10^{-3}$ | $2.63 \times 10^{-14}$ | $-3.52 \times 10^{-2}$ | $3.21 \times 10^{-2}$ | $2.73 \times 10^{-1}$ |
| rs6752675  | $6.27 \times 10^{-3}$  | $9.24 \times 10^{-3}$ | $4.98 \times 10^{-1}$ | $-2.55 \times 10^{-2}$ | $3.56 \times 10^{-3}$ | $7.18 \times 10^{-13}$ | $-1.14 \times 10^{-2}$ | $3.36 \times 10^{-2}$ | $7.35 \times 10^{-1}$ |
| rs6786418  | $6.14 \times 10^{-3}$  | $9.77 \times 10^{-3}$ | $5.30 \times 10^{-1}$ | $-1.91 \times 10^{-2}$ | $3.88 \times 10^{-3}$ | $8.23 \times 10^{-7}$  | $-3.26 \times 10^{-2}$ | $3.20 \times 10^{-2}$ | $3.08 \times 10^{-1}$ |
| rs6845883  | $-2.13 \times 10^{-2}$ | $1.10 \times 10^{-2}$ | $5.42 \times 10^{-2}$ | $-2.45 \times 10^{-2}$ | $4.32 \times 10^{-3}$ | $1.46 \times 10^{-8}$  | $8.39 \times 10^{-3}$  | $3.37 \times 10^{-2}$ | $8.04 \times 10^{-1}$ |
| rs6911986  | $1.09 \times 10^{-2}$  | $1.03 \times 10^{-2}$ | $2.87 \times 10^{-1}$ | $2.10 \times 10^{-2}$  | $4.04 \times 10^{-3}$ | $1.94 \times 10^{-7}$  | $-5.03 \times 10^{-2}$ | $3.83 \times 10^{-2}$ | $1.89 \times 10^{-1}$ |
| rs6974377  | $4.96 \times 10^{-3}$  | $9.87 \times 10^{-3}$ | $6.15 \times 10^{-1}$ | $2.01 \times 10^{-2}$  | $3.87 \times 10^{-3}$ | $1.91 \times 10^{-7}$  | $9.23 \times 10^{-2}$  | $3.49 \times 10^{-2}$ | $8.12 \times 10^{-3}$ |
| rs6976111  | $-1.01 \times 10^{-2}$ | $9.60 \times 10^{-3}$ | $2.92 \times 10^{-1}$ | $2.67 \times 10^{-2}$  | $4.05 \times 10^{-3}$ | $3.99 \times 10^{-11}$ | $-1.51 \times 10^{-2}$ | $3.41 \times 10^{-2}$ | $6.58 \times 10^{-1}$ |
| rs698050   | $-3.16 \times 10^{-3}$ | $9.20 \times 10^{-3}$ | $7.31 \times 10^{-1}$ | $1.76 \times 10^{-2}$  | $3.57 \times 10^{-3}$ | $7.66 \times 10^{-7}$  | $4.31 \times 10^{-2}$  | $3.32 \times 10^{-2}$ | $1.94 \times 10^{-1}$ |
| rs7102620  | $-7.71 \times 10^{-3}$ | $9.27 \times 10^{-3}$ | $4.06 \times 10^{-1}$ | $-2.00 \times 10^{-2}$ | $3.66 \times 10^{-3}$ | $4.98 \times 10^{-8}$  | $3.56 \times 10^{-2}$  | $3.18 \times 10^{-2}$ | $2.63 \times 10^{-1}$ |
| rs715693   | $5.91 \times 10^{-3}$  | $9.92 \times 10^{-3}$ | $5.51 \times 10^{-1}$ | $2.00 \times 10^{-2}$  | $3.65 \times 10^{-3}$ | $4.44 \times 10^{-8}$  | $4.83 \times 10^{-2}$  | $3.21 \times 10^{-2}$ | $1.33 \times 10^{-1}$ |
| rs71627577 | $-1.33 \times 10^{-2}$ | $1.23 \times 10^{-2}$ | $2.78 \times 10^{-1}$ | $-3.02 \times 10^{-2}$ | $5.64 \times 10^{-3}$ | $8.59 \times 10^{-8}$  | $7.37 \times 10^{-3}$  | $3.43 \times 10^{-2}$ | $8.30 \times 10^{-1}$ |
| rs717915   | $-5.38 \times 10^{-3}$ | $9.42 \times 10^{-3}$ | $5.68 \times 10^{-1}$ | $1.92 \times 10^{-2}$  | $3.70 \times 10^{-3}$ | $2.05 \times 10^{-7}$  | $5.74 \times 10^{-2}$  | $4.22 \times 10^{-2}$ | $1.73 \times 10^{-1}$ |
| rs72678859 | $-9.90 \times 10^{-3}$ | $1.33 \times 10^{-2}$ | $4.57 \times 10^{-1}$ | $-2.40 \times 10^{-2}$ | $4.83 \times 10^{-3}$ | $6.30 \times 10^{-7}$  | $7.65 \times 10^{-2}$  | $3.26 \times 10^{-2}$ | $1.89 \times 10^{-2}$ |
| rs72683129 | $9.28 \times 10^{-3}$  | $1.34 \times 10^{-2}$ | $4.88 \times 10^{-1}$ | $-2.52 \times 10^{-2}$ | $5.06 \times 10^{-3}$ | $6.85 \times 10^{-7}$  | $-4.86 \times 10^{-2}$ | $4.60 \times 10^{-2}$ | $2.91 \times 10^{-1}$ |
| rs72861745 | $2.67 \times 10^{-2}$  | $1.22 \times 10^{-2}$ | $2.88 \times 10^{-2}$ | $-2.90 \times 10^{-2}$ | $4.15 \times 10^{-3}$ | $2.90 \times 10^{-12}$ | $6.07 \times 10^{-2}$  | $4.61 \times 10^{-2}$ | $1.89 \times 10^{-1}$ |
| rs72896886 | $-2.99 \times 10^{-2}$ | $1.24 \times 10^{-2}$ | $1.64 \times 10^{-2}$ | $-2.69 \times 10^{-2}$ | $4.84 \times 10^{-3}$ | $2.75 \times 10^{-8}$  | $-3.01 \times 10^{-2}$ | $4.27 \times 10^{-2}$ | $4.82 \times 10^{-1}$ |
| rs72976162 | $3.65 \times 10^{-3}$  | $1.20 \times 10^{-2}$ | $7.62 \times 10^{-1}$ | $2.22 \times 10^{-2}$  | $4.53 \times 10^{-3}$ | $9.21 \times 10^{-7}$  | $4.62 \times 10^{-3}$  | $4.32 \times 10^{-2}$ | $9.15 \times 10^{-1}$ |
| rs7333724  | $6.94 \times 10^{-3}$  | $1.20 \times 10^{-2}$ | $5.62 \times 10^{-1}$ | $-2.18 \times 10^{-2}$ | $4.34 \times 10^{-3}$ | $5.26 \times 10^{-7}$  | $-1.08 \times 10^{-2}$ | $4.19 \times 10^{-2}$ | $7.96 \times 10^{-1}$ |
| rs74531549 | $-3.81 \times 10^{-2}$ | $1.65 \times 10^{-2}$ | $2.12 \times 10^{-2}$ | $2.69 \times 10^{-2}$  | $5.19 \times 10^{-3}$ | $2.11 \times 10^{-7}$  | $-3.35 \times 10^{-2}$ | $4.16 \times 10^{-2}$ | $4.20 \times 10^{-1}$ |
| rs745571   | $-4.07 \times 10^{-3}$ | $9.19 \times 10^{-3}$ | $6.58 \times 10^{-1}$ | $-1.77 \times 10^{-2}$ | $3.56 \times 10^{-3}$ | $6.55 \times 10^{-7}$  | $-5.90 \times 10^{-2}$ | $5.73 \times 10^{-2}$ | $3.03 \times 10^{-1}$ |
| rs74876138 | $4.03 \times 10^{-3}$  | $9.64 \times 10^{-3}$ | $6.76 \times 10^{-1}$ | $2.00 \times 10^{-2}$  | $4.05 \times 10^{-3}$ | $7.42 \times 10^{-7}$  | $-8.64 \times 10^{-3}$ | $3.18 \times 10^{-2}$ | $7.86 \times 10^{-1}$ |
| rs7505855  | $-1.60 \times 10^{-2}$ | $9.30 \times 10^{-3}$ | $8.48 \times 10^{-2}$ | $-1.90 \times 10^{-2}$ | $3.61 \times 10^{-3}$ | $1.45 \times 10^{-7}$  | $1.67 \times 10^{-2}$  | $3.32 \times 10^{-2}$ | $6.16 \times 10^{-1}$ |

| SNPs       | GERD                   |                       |                       | Smoking Initiation     |                       |                       | IPF                    |                       |                       |
|------------|------------------------|-----------------------|-----------------------|------------------------|-----------------------|-----------------------|------------------------|-----------------------|-----------------------|
|            | Beta                   | SE                    | P-value               | Beta                   | SE                    | P-value               | Beta                   | SE                    | P-value               |
| rs75121303 | $1.26 \times 10^{-3}$  | $1.30 \times 10^{-2}$ | $9.22 \times 10^{-1}$ | $-2.67 \times 10^{-2}$ | $4.91 \times 10^{-3}$ | $5.25 \times 10^{-8}$ | $-8.15 \times 10^{-2}$ | $4.48 \times 10^{-2}$ | $6.88 \times 10^{-2}$ |
| rs75177132 | $-4.93 \times 10^{-3}$ | $1.95 \times 10^{-2}$ | $8.00 \times 10^{-1}$ | $-4.65 \times 10^{-2}$ | $8.38 \times 10^{-3}$ | $2.85 \times 10^{-8}$ | $-6.57 \times 10^{-2}$ | $6.67 \times 10^{-2}$ | $3.25 \times 10^{-1}$ |
| rs7545279  | $1.43 \times 10^{-3}$  | $1.01 \times 10^{-2}$ | $8.88 \times 10^{-1}$ | $-2.31 \times 10^{-2}$ | $4.35 \times 10^{-3}$ | $1.15 \times 10^{-7}$ | $4.40 \times 10^{-2}$  | $3.49 \times 10^{-2}$ | $2.08 \times 10^{-1}$ |
| rs7594223  | $-9.19 \times 10^{-3}$ | $9.72 \times 10^{-3}$ | $3.45 \times 10^{-1}$ | $-1.88 \times 10^{-2}$ | $3.66 \times 10^{-3}$ | $2.89 \times 10^{-7}$ | $3.93 \times 10^{-2}$  | $3.37 \times 10^{-2}$ | $2.43 \times 10^{-1}$ |
| rs7631379  | $3.73 \times 10^{-3}$  | $1.26 \times 10^{-2}$ | $7.68 \times 10^{-1}$ | $2.19 \times 10^{-2}$  | $4.40 \times 10^{-3}$ | $6.58 \times 10^{-7}$ | $5.49 \times 10^{-2}$  | $4.41 \times 10^{-2}$ | $2.13 \times 10^{-1}$ |
| rs766614   | $4.22 \times 10^{-4}$  | $1.04 \times 10^{-2}$ | $9.68 \times 10^{-1}$ | $2.28 \times 10^{-2}$  | $4.34 \times 10^{-3}$ | $1.51 \times 10^{-7}$ | $3.67 \times 10^{-2}$  | $3.59 \times 10^{-2}$ | $3.07 \times 10^{-1}$ |
| rs7707036  | $2.51 \times 10^{-3}$  | $9.21 \times 10^{-3}$ | $7.85 \times 10^{-1}$ | $1.77 \times 10^{-2}$  | $3.57 \times 10^{-3}$ | $7.24 \times 10^{-7}$ | $-3.70 \times 10^{-2}$ | $3.18 \times 10^{-2}$ | $2.45 \times 10^{-1}$ |
| rs77075313 | $-1.62 \times 10^{-2}$ | $2.08 \times 10^{-2}$ | $4.37 \times 10^{-1}$ | $-4.29 \times 10^{-2}$ | $8.70 \times 10^{-3}$ | $8.15 \times 10^{-7}$ | $2.16 \times 10^{-2}$  | $7.22 \times 10^{-2}$ | $7.65 \times 10^{-1}$ |
| rs773107   | $-2.37 \times 10^{-2}$ | $1.03 \times 10^{-2}$ | $2.09 \times 10^{-2}$ | $-1.94 \times 10^{-2}$ | $3.97 \times 10^{-3}$ | $9.58 \times 10^{-7}$ | $-5.92 \times 10^{-2}$ | $3.55 \times 10^{-2}$ | $9.54 \times 10^{-2}$ |
| rs77963899 | $1.72 \times 10^{-2}$  | $2.20 \times 10^{-2}$ | $4.35 \times 10^{-1}$ | $-4.02 \times 10^{-2}$ | $7.71 \times 10^{-3}$ | $1.93 \times 10^{-7}$ | $3.49 \times 10^{-3}$  | $7.56 \times 10^{-2}$ | $9.63 \times 10^{-1}$ |
| rs7835456  | $3.28 \times 10^{-3}$  | $9.18 \times 10^{-3}$ | $7.21 \times 10^{-1}$ | $-2.00 \times 10^{-2}$ | $3.56 \times 10^{-3}$ | $1.96 \times 10^{-8}$ | $-5.75 \times 10^{-2}$ | $3.18 \times 10^{-2}$ | $7.05 \times 10^{-2}$ |
| rs7844990  | $-8.25 \times 10^{-3}$ | $9.30 \times 10^{-3}$ | $3.75 \times 10^{-1}$ | $2.01 \times 10^{-2}$  | $3.63 \times 10^{-3}$ | $3.23 \times 10^{-8}$ | $-1.67 \times 10^{-2}$ | $3.22 \times 10^{-2}$ | $6.05 \times 10^{-1}$ |
| rs7855587  | $9.79 \times 10^{-3}$  | $9.43 \times 10^{-3}$ | $2.99 \times 10^{-1}$ | $1.93 \times 10^{-2}$  | $3.56 \times 10^{-3}$ | $5.57 \times 10^{-8}$ | $8.49 \times 10^{-2}$  | $3.23 \times 10^{-2}$ | $8.60 \times 10^{-3}$ |
| rs78975669 | $-3.05 \times 10^{-2}$ | $1.75 \times 10^{-2}$ | $8.25 \times 10^{-2}$ | $-4.28 \times 10^{-2}$ | $8.67 \times 10^{-3}$ | $7.86 \times 10^{-7}$ | $6.42 \times 10^{-3}$  | $6.00 \times 10^{-2}$ | $9.15 \times 10^{-1}$ |
| rs7901883  | $1.36 \times 10^{-2}$  | $1.09 \times 10^{-2}$ | $2.13 \times 10^{-1}$ | $-2.45 \times 10^{-2}$ | $4.25 \times 10^{-3}$ | $7.98 \times 10^{-9}$ | $-8.78 \times 10^{-2}$ | $3.77 \times 10^{-2}$ | $1.97 \times 10^{-2}$ |
| rs79098346 | $-2.87 \times 10^{-2}$ | $1.65 \times 10^{-2}$ | $8.21 \times 10^{-2}$ | $3.39 \times 10^{-2}$  | $6.87 \times 10^{-3}$ | $7.84 \times 10^{-7}$ | $-5.57 \times 10^{-2}$ | $5.69 \times 10^{-2}$ | $3.28 \times 10^{-1}$ |
| rs7946110  | $5.92 \times 10^{-2}$  | $1.19 \times 10^{-2}$ | $5.92 \times 10^{-7}$ | $4.87 \times 10^{-4}$  | $4.85 \times 10^{-3}$ | $9.20 \times 10^{-1}$ | $-5.83 \times 10^{-2}$ | $4.05 \times 10^{-2}$ | $1.50 \times 10^{-1}$ |
| rs7996220  | $8.20 \times 10^{-3}$  | $9.21 \times 10^{-3}$ | $3.73 \times 10^{-1}$ | $1.83 \times 10^{-2}$  | $3.57 \times 10^{-3}$ | $2.85 \times 10^{-7}$ | $7.49 \times 10^{-4}$  | $3.19 \times 10^{-2}$ | $9.81 \times 10^{-1}$ |
| rs8010469  | $-4.36 \times 10^{-4}$ | $9.21 \times 10^{-3}$ | $9.62 \times 10^{-1}$ | $-1.77 \times 10^{-2}$ | $3.57 \times 10^{-3}$ | $7.56 \times 10^{-7}$ | $3.85 \times 10^{-2}$  | $3.19 \times 10^{-2}$ | $2.28 \times 10^{-1}$ |
| rs8082894  | $1.02 \times 10^{-2}$  | $1.00 \times 10^{-2}$ | $3.08 \times 10^{-1}$ | $-1.89 \times 10^{-2}$ | $3.83 \times 10^{-3}$ | $8.53 \times 10^{-7}$ | $-8.93 \times 10^{-2}$ | $3.48 \times 10^{-2}$ | $1.02 \times 10^{-2}$ |
| rs814518   | $3.86 \times 10^{-3}$  | $9.51 \times 10^{-3}$ | $6.85 \times 10^{-1}$ | $-1.90 \times 10^{-2}$ | $3.84 \times 10^{-3}$ | $7.71 \times 10^{-7}$ | $-1.44 \times 10^{-2}$ | $3.28 \times 10^{-2}$ | $6.61 \times 10^{-1}$ |
| rs827153   | $-1.30 \times 10^{-3}$ | $9.71 \times 10^{-3}$ | $8.94 \times 10^{-1}$ | $1.80 \times 10^{-2}$  | $3.68 \times 10^{-3}$ | $9.49 \times 10^{-7}$ | $-3.51 \times 10^{-2}$ | $3.37 \times 10^{-2}$ | $2.97 \times 10^{-1}$ |

| SNPs      | GERD                   |                       |                       | Smoking Initiation     |                       |                       | IPF                    |                       |                       |
|-----------|------------------------|-----------------------|-----------------------|------------------------|-----------------------|-----------------------|------------------------|-----------------------|-----------------------|
|           | Beta                   | SE                    | P-value               | Beta                   | SE                    | P-value               | Beta                   | SE                    | P-value               |
| rs914647  | $1.77 \times 10^{-3}$  | $9.35 \times 10^{-3}$ | $8.50 \times 10^{-1}$ | $1.79 \times 10^{-2}$  | $3.61 \times 10^{-3}$ | $7.60 \times 10^{-7}$ | $4.07 \times 10^{-3}$  | $3.23 \times 10^{-2}$ | $9.00 \times 10^{-1}$ |
| rs917154  | $-1.43 \times 10^{-4}$ | $1.10 \times 10^{-2}$ | $9.90 \times 10^{-1}$ | $-2.91 \times 10^{-2}$ | $4.90 \times 10^{-3}$ | $2.77 \times 10^{-9}$ | $4.10 \times 10^{-2}$  | $3.80 \times 10^{-2}$ | $2.81 \times 10^{-1}$ |
| rs929623  | $-2.05 \times 10^{-2}$ | $1.04 \times 10^{-2}$ | $4.83 \times 10^{-2}$ | $-1.90 \times 10^{-2}$ | $3.76 \times 10^{-3}$ | $4.60 \times 10^{-7}$ | $-1.20 \times 10^{-2}$ | $3.61 \times 10^{-2}$ | $7.38 \times 10^{-1}$ |
| rs9388686 | $1.28 \times 10^{-3}$  | $1.16 \times 10^{-2}$ | $9.12 \times 10^{-1}$ | $2.35 \times 10^{-2}$  | $4.70 \times 10^{-3}$ | $6.14 \times 10^{-7}$ | $-1.42 \times 10^{-2}$ | $4.02 \times 10^{-2}$ | $7.25 \times 10^{-1}$ |
| rs9399695 | $2.64 \times 10^{-3}$  | $9.37 \times 10^{-3}$ | $7.78 \times 10^{-1}$ | $-1.86 \times 10^{-2}$ | $3.59 \times 10^{-3}$ | $2.37 \times 10^{-7}$ | $-2.27 \times 10^{-2}$ | $3.24 \times 10^{-2}$ | $4.84 \times 10^{-1}$ |
| rs9411424 | $-1.40 \times 10^{-2}$ | $1.02 \times 10^{-2}$ | $1.71 \times 10^{-1}$ | $-1.89 \times 10^{-2}$ | $3.82 \times 10^{-3}$ | $6.95 \times 10^{-7}$ | $-7.68 \times 10^{-3}$ | $3.56 \times 10^{-2}$ | $8.29 \times 10^{-1}$ |
| rs9423279 | $6.43 \times 10^{-3}$  | $9.42 \times 10^{-3}$ | $4.95 \times 10^{-1}$ | $-2.05 \times 10^{-2}$ | $3.71 \times 10^{-3}$ | $3.21 \times 10^{-8}$ | $3.45 \times 10^{-2}$  | $3.26 \times 10^{-2}$ | $2.90 \times 10^{-1}$ |
| rs943725  | $-8.58 \times 10^{-3}$ | $9.77 \times 10^{-3}$ | $3.80 \times 10^{-1}$ | $-1.93 \times 10^{-2}$ | $3.94 \times 10^{-3}$ | $9.96 \times 10^{-7}$ | $3.71 \times 10^{-2}$  | $3.39 \times 10^{-2}$ | $2.74 \times 10^{-1}$ |
| rs9518075 | $-2.01 \times 10^{-2}$ | $1.10 \times 10^{-2}$ | $6.79 \times 10^{-2}$ | $-2.19 \times 10^{-2}$ | $4.28 \times 10^{-3}$ | $3.22 \times 10^{-7}$ | $-6.04 \times 10^{-2}$ | $3.80 \times 10^{-2}$ | $1.12 \times 10^{-1}$ |
| rs954467  | $-1.20 \times 10^{-2}$ | $9.39 \times 10^{-3}$ | $2.00 \times 10^{-1}$ | $1.84 \times 10^{-2}$  | $3.56 \times 10^{-3}$ | $2.20 \times 10^{-7}$ | $-3.51 \times 10^{-2}$ | $3.25 \times 10^{-2}$ | $2.81 \times 10^{-1}$ |
| rs9545502 | $-2.00 \times 10^{-2}$ | $1.06 \times 10^{-2}$ | $5.95 \times 10^{-2}$ | $-2.11 \times 10^{-2}$ | $4.28 \times 10^{-3}$ | $8.23 \times 10^{-7}$ | $-3.79 \times 10^{-2}$ | $3.68 \times 10^{-2}$ | $3.03 \times 10^{-1}$ |
| rs9582795 | $-9.66 \times 10^{-3}$ | $1.10 \times 10^{-2}$ | $3.78 \times 10^{-1}$ | $-1.90 \times 10^{-2}$ | $3.80 \times 10^{-3}$ | $5.78 \times 10^{-7}$ | $-4.41 \times 10^{-2}$ | $3.81 \times 10^{-2}$ | $2.47 \times 10^{-1}$ |
| rs9847024 | $3.23 \times 10^{-3}$  | $1.05 \times 10^{-2}$ | $7.58 \times 10^{-1}$ | $2.21 \times 10^{-2}$  | $4.19 \times 10^{-3}$ | $1.28 \times 10^{-7}$ | $-1.22 \times 10^{-2}$ | $3.65 \times 10^{-2}$ | $7.37 \times 10^{-1}$ |
| rs9881798 | $7.14 \times 10^{-3}$  | $9.47 \times 10^{-3}$ | $4.51 \times 10^{-1}$ | $1.83 \times 10^{-2}$  | $3.62 \times 10^{-3}$ | $4.05 \times 10^{-7}$ | $3.31 \times 10^{-3}$  | $3.28 \times 10^{-2}$ | $9.20 \times 10^{-1}$ |
| rs9933873 | $-6.01 \times 10^{-4}$ | $9.23 \times 10^{-3}$ | $9.48 \times 10^{-1}$ | $1.77 \times 10^{-2}$  | $3.58 \times 10^{-3}$ | $7.09 \times 10^{-7}$ | $-2.30 \times 10^{-2}$ | $3.20 \times 10^{-2}$ | $4.73 \times 10^{-1}$ |
| rs9936337 | $3.45 \times 10^{-2}$  | $9.63 \times 10^{-3}$ | $3.41 \times 10^{-4}$ | $1.91 \times 10^{-2}$  | $3.58 \times 10^{-3}$ | $1.05 \times 10^{-7}$ | $3.62 \times 10^{-2}$  | $3.33 \times 10^{-2}$ | $2.77 \times 10^{-1}$ |

Abbreviations: SNP: single nucleotide polymorphism; SE: standard error; GERD: gastroesophageal reflux disease; IPF: idiopathic pulmonary fibrosis.

**Table S6 Results of MVMR adjusting for smoking initiation**

| <b>Method</b>                        | <b>Cohort</b> | <b>OR (95% CI)</b> | <b>P-value</b> |
|--------------------------------------|---------------|--------------------|----------------|
| <b>GRED on susceptibility of IPF</b> |               | <b>OR (95% CI)</b> |                |
| IVW                                  | Discovery     | 1.30 (0.93 – 1.68) | 0.071          |
| MVMR -Egger                          |               | 0.91 (0.34 – 1.48) | 0.767          |
| <b>GRED on susceptibility of IPF</b> |               | <b>OR (95% CI)</b> |                |
| IVW                                  | Replication   | 1.14 (0.74 – 1.54) | 0.464          |
| MVMR-Egger                           |               | 1.07 (0.55 – 1.59) | 0.788          |

Abbreviations: MVMR: multivariate Mendelian randomization; GERD:

gastroesophageal reflux disease; IPF: idiopathic pulmonary fibrosis; OR: odds ratio; CI:

confidence intervals; IVW: inverse variance weighted.

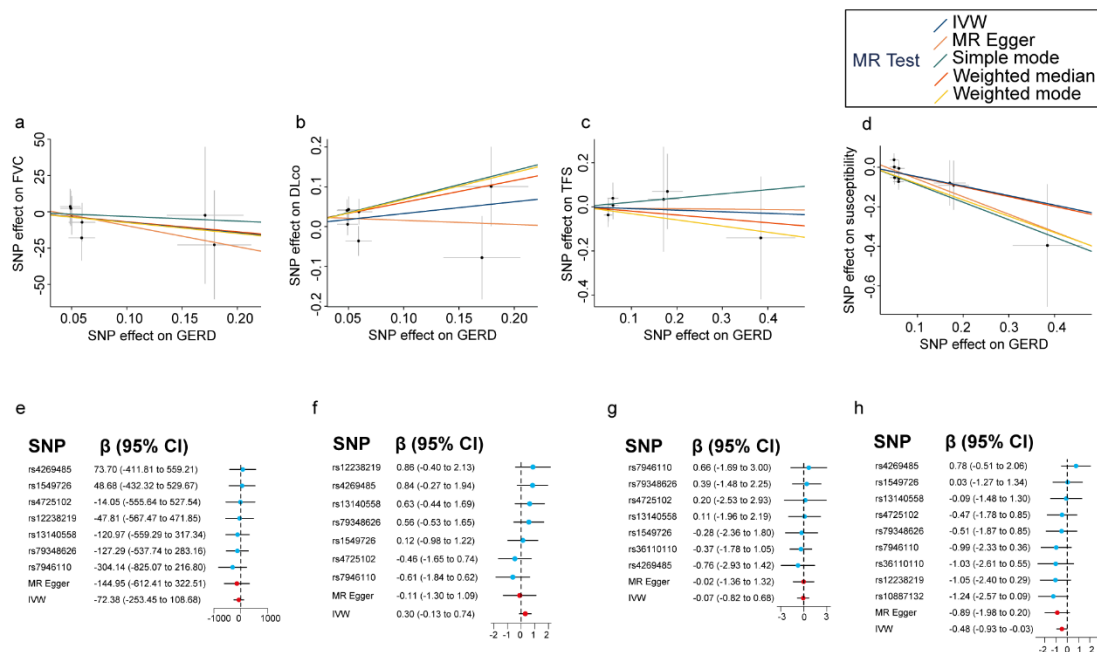

**Fig. S1 Scatterplots and forest plots of associations between GERD-associated SNPs and IPF in replication cohort.** Scatterplots of SNP effects on GERD and FVC (a), DLco (b), TFS (c), and susceptibility (d) in patients with IPF. Forest plots of individual and combined SNP MR-estimated effect size for GERD on FVC (e), DLco (f), TFS (g), and susceptibility (h) in patients with IPF. Abbreviations: MR: Mendelian randomization; IVW: inverse variance weighted; GERD: gastroesophageal reflux disease; FVC: forced vital capacity; DLco: diffuse lung capacity for carbon monoxide; TFS: transplantation-free survival; SNP: single nucleotide polymorphism.

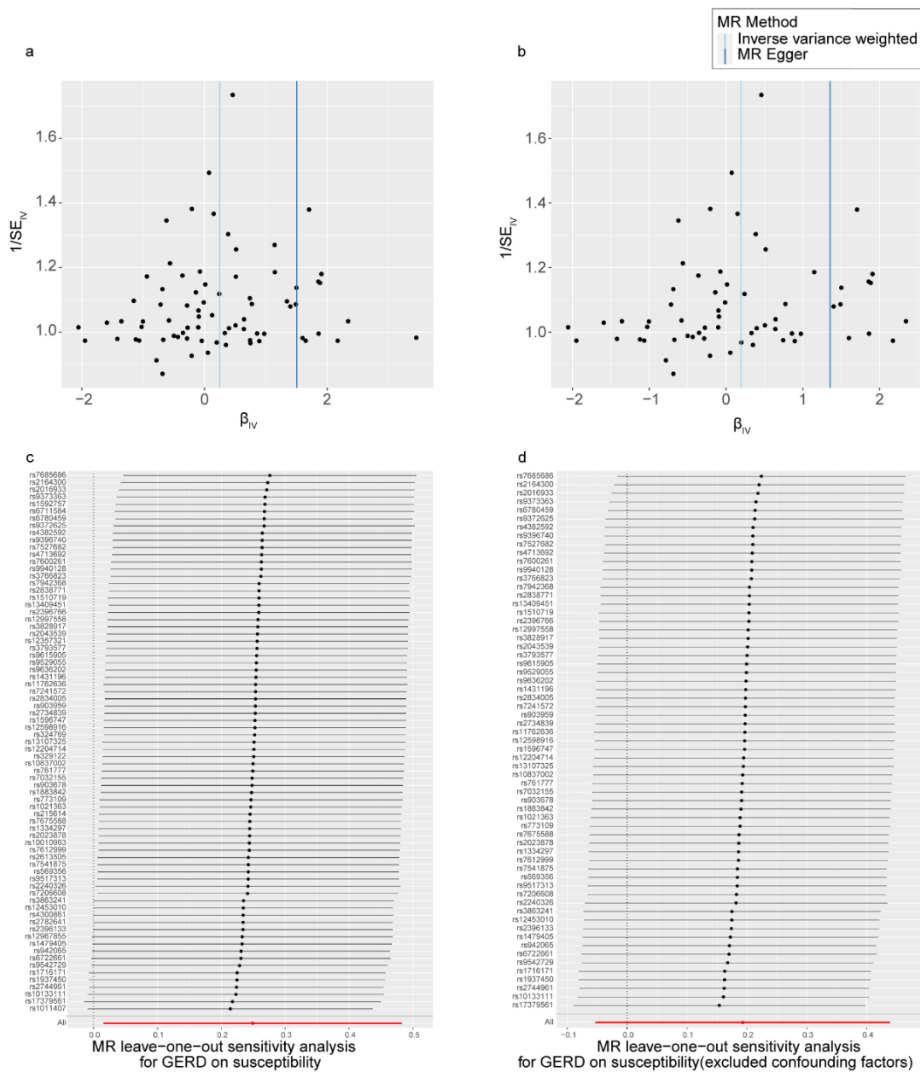

**Fig. S2 Funnel plots and leave-one-out analyses for SNPs associated with GERD on susceptibility to IPF in discovery cohort.** Funnel plots showed the overall heterogeneity effect of GERD on susceptibility to IPF before removing SNPs related to confounding factors and outliers (a), and after removal (b). The leave-one-out analyses were conducted to assess the influence of individual SNP variants of GERD susceptibility to IPF before removing SNPs related to confounding factors and outliers (a), and after removal (b). Abbreviations: MR: Mendelian randomization; GERD: gastroesophageal reflux disease; IPF: idiopathic pulmonary fibrosis; SNP: single nucleotide polymorphism; SE: standard error; IV: instrumental variable.

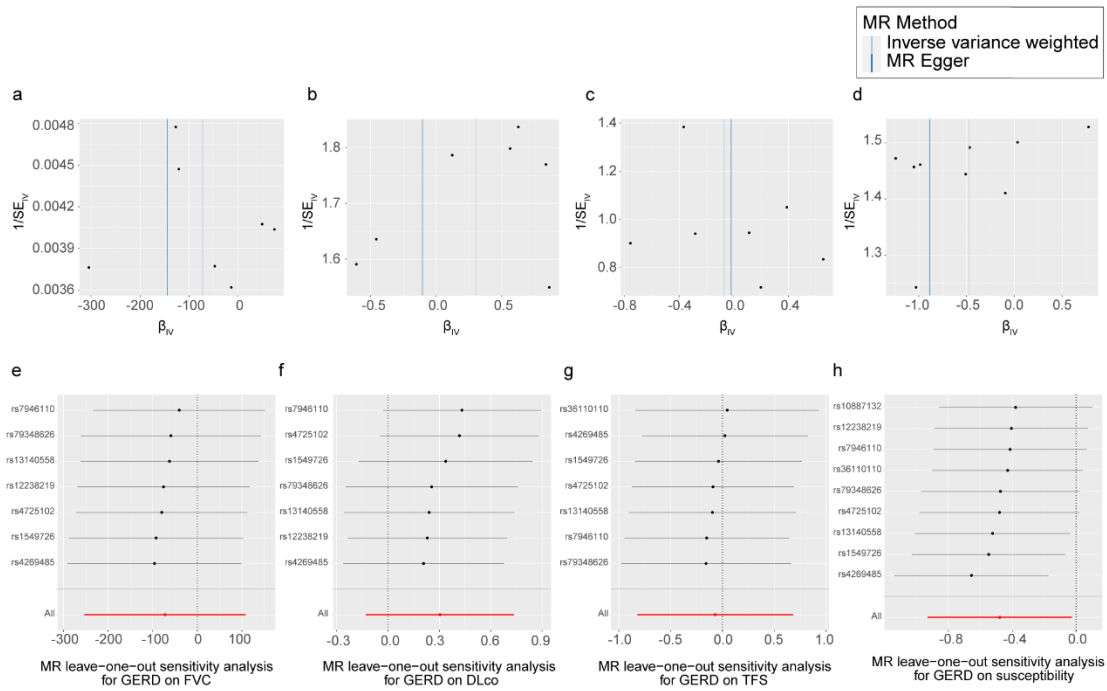

**Fig. S3 Funnel plots and leave-one-out analyses for SNPs associated with GERD**

**on IPF in replication cohort.** Funnel plots showed the overall heterogeneity effect of GERD on FVC (a), DLco (b), TFS (c), and susceptibility (d) in patients with IPF. The leave-one-out analyses were conducted to assess the influence of individual SNP variants of GERD on FVC (e), DLco (f), TFS (g), and susceptibility (h) in patients with IPF. Abbreviations: MR: Mendelian randomization; GERD: gastroesophageal reflux disease; FVC: forced vital capacity; DLco: diffuse lung capacity for carbon monoxide; TFS: transplantation-free survival; SNP: single nucleotide polymorphism; SE: standard error; IV: instrumental variable; IPF: idiopathic pulmonary fibrosis.

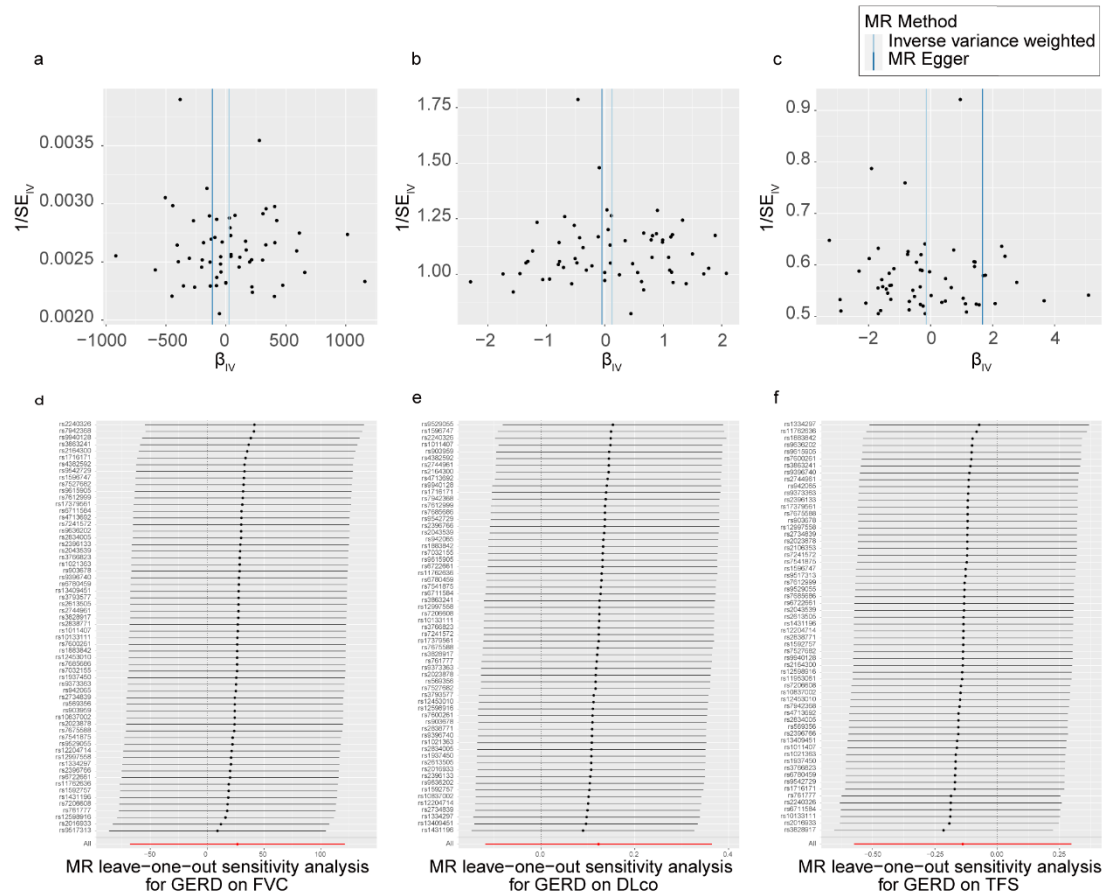

**Fig. S4 Funnel plots and leave-one-out analyses for SNPs associated with GERD on the prognosis of IPF in discovery cohort.** Funnel plots showed the overall heterogeneity effect of GERD on FVC (a), DLco (b), and TFS (c) in patients with IPF. The leave-one-out analyses were conducted to assess the influence of individual SNP variants of GERD on FVC (d), DLco (e), and TFS (f). Abbreviations: MR: Mendelian randomization; GERD: gastroesophageal reflux disease; FVC: forced vital capacity; DLco: diffuse lung capacity for carbon monoxide; TFS: transplantation-free survival; SNP: single nucleotide polymorphism; SE: standard error; IV: instrumental variable; IPF: idiopathic pulmonary fibrosis.
